# Supplementary material
Source: publisher figshare collection journal article supplement (https://gsapubs.figshare.com/ndownloader/files/34981744)
Supplement: Supplementary file 1 [file 34981744]

## Sheet: Zircon Hf
Table S6. Summary of zircon Hf isotopic data of intrusive rocks in the Beishan
No	Rock type	Age(Ma)	Location	Sample	176Yb/177Hf	176Lu/177Hf	176Hf/177Hf
1	granitic porphyry	202	Shibanjing	15	0.0487	0.0015	0.282724
2	granitic porphyry	202	Shibanjing	17	0.0305	0.0009	0.282693
3	granitic porphyry	202	Shibanjing	19	0.0479	0.0014	0.282753
4	granitic porphyry	204	Shibanjing	7	0.0458	0.0013	0.282711
5	granitic porphyry	204	Shibanjing	16	0.0391	0.0013	0.282646
6	granitic porphyry	206	Shibanjing	12	0.0539	0.0018	0.282736
7	granitic porphyry	207	Shibanjing	7	0.0464	0.0015	0.282712
8	granitic porphyry	207	Shibanjing	11	0.0459	0.0013	0.282704
9	granitic porphyry	207	Shibanjing	13	0.0247	0.0007	0.282801
10	granitic porphyry	207	Shibanjing	14	0.0244	0.0008	0.28269
11	granitic porphyry	207	Shibanjing	20	0.028	0.0009	0.282756
12	granitic porphyry	207	Shibanjing	21	0.03	0.0009	0.282699
13	granitic porphyry	207	Shibanjing	22	0.0434	0.0014	0.282773
14	granitic porphyry	208	Shibanjing	18	0.0402	0.0012	0.282736
15	granitic porphyry	208	Shibanjing	23	0.0599	0.0017	0.282754
16	granitic porphyry	208	Shibanjing	24	0.0348	0.001	0.2827
17	granitic porphyry	209	Shibanjing	13	0.1373	0.0043	0.28294
18	granitic porphyry	209	Shibanjing	TW730b-3	0.0274	0.0009	0.282722
19	granitic porphyry	210	Shibanjing	TW730a-2	0.0536	0.0016	0.282695
20	granitic porphyry	211	Shibanjing	9	0.0933	0.0027	0.282701
21	granitic porphyry	212	Shibanjing	22	0.042	0.0014	0.282692
22	granitic porphyry	213	Shibanjing	5	0.1539	0.0041	0.282615
23	granitic porphyry	213	Shibanjing	16	0.0364	0.0011	0.282795
24	granitic porphyry	213	Shibanjing	17	0.0755	0.0023	0.282749
25	granitic porphyry	213	Shibanjing	18	0.0575	0.0016	0.282737
26	granitic porphyry	214	Shibanjing	8	0.0303	0.0009	0.282718
27	granitic porphyry	214	Shibanjing	10	0.1344	0.0045	0.282711
28	granitic porphyry	214	Shibanjing	14	0.0519	0.0017	0.282795
29	granitic porphyry	214	Shibanjing	24	0.1892	0.0057	0.282892
30	granitic porphyry	215	Shibanjing	4	0.0818	0.0023	0.28273
31	granitic porphyry	215	Shibanjing	12	0.0388	0.0013	0.282741
32	granitic porphyry	216	Shibanjing	21	0.0288	0.001	0.282754
33	granite porphyry	217	Huaniushan	HNS09823-2.2-1	0.040815	0.000845	0.282693
34	granite porphyry	217	Huaniushan	HNS09823-2.2-2	0.035006	0.000811	0.282666
35	granite porphyry	217	Huaniushan	HNS09823-2.2-3	0.036993	0.000796	0.28271
36	granite porphyry	217	Huaniushan	HNS09823-2.2-4	0.037824	0.00093	0.282653
37	granite porphyry	217	Huaniushan	HNS09823-2.2-5	0.060713	0.001289	0.282685
38	granite porphyry	217	Huaniushan	HNS09823-2.2-6	0.067908	0.001633	0.28272
39	granite porphyry	217	Huaniushan	HNS09823-2.2-7	0.037133	0.00084	0.282652
40	granite porphyry	217	Huaniushan	HNS09823-2.2-8	0.03405	0.000823	0.282711
41	granite porphyry	217	Huaniushan	HNS09823-2.2-9	0.044193	0.001111	0.28269
42	quartz syenite	221	Daquan	B80625-6-1	0.052331	0.001214	0.282674
43	quartz syenite	221	Daquan	B80625-6-2	0.077187	0.001873	0.282683
44	quartz syenite	221	Daquan	B80625-6-3	0.034239	0.000798	0.282697
45	quartz syenite	221	Daquan	B80625-6-4	0.08508	0.002032	0.282654
46	quartz syenite	221	Daquan	B80625-6-5	0.034226	0.000853	0.282715
47	quartz syenite	221	Daquan	B80625-6-6	0.072993	0.001783	0.282682
48	quartz syenite	221	Daquan	B80625-6-7	0.054168	0.001291	0.282713
49	quartz syenite	221	Daquan	B80625-6-8	0.096562	0.002149	0.282695
50	quartz syenite	221	Daquan	B80625-6-9	0.060462	0.001745	0.282686
51	quartz syenite	221	Daquan	B80625-6-10	0.052851	0.001224	0.282673
52	quartz syenite	221	Daquan	B80625-6-11	0.045557	0.001219	0.282729
53	quartz syenite	221	Daquan	B80625-6-12	0.037042	0.000896	0.282703
54	quartz syenite	221	Daquan	B80625-6-13	0.037083	0.00127	0.282699
55	quartz syenite	221	Daquan	B80625-6-14	0.075932	0.002343	0.282717
56	quartz syenite	221	Daquan	B80625-6-15	0.043467	0.00115	0.282649
57	quartz syenite	221	Daquan	B80625-6-16	0.061433	0.00175	0.28268
58	quartz syenite	221	Daquan	B80625-6-17	0.073522	0.001734	0.28267
59	quartz syenite	221	Daquan	B80625-6-18	0.056502	0.001355	0.282778
60	quartz syenite	221	Daquan	B80625-6-19	0.073897	0.001955	0.282673
61	quartz syenite	221	Daquan	B80625-6-20	0.055594	0.00125	0.282734
62	syenogranite	221	Huaniushan	B070822-4-1	0.02469	0.00093	0.282781
63	syenogranite	221	Huaniushan	B070822-4-2	0.027882	0.001079	0.282736
64	syenogranite	221	Huaniushan	B070822-4-3	0.030472	0.001071	0.282766
65	syenogranite	221	Huaniushan	B070822-4-4	0.032383	0.001257	0.282738
66	syenogranite	221	Huaniushan	B070822-4-5	0.024392	0.000932	0.282797
67	syenogranite	221	Huaniushan	B070822-4-6	0.035597	0.001215	0.282755
68	syenogranite	221	Huaniushan	B070822-4-7	0.026186	0.001058	0.282761
69	syenogranite	221	Huaniushan	B070822-4-8	0.025386	0.000959	0.282744
70	syenogranite	221	Huaniushan	B070822-4-9	0.029035	0.001182	0.282786
71	syenogranite	221	Huaniushan	B070822-4-10	0.02742	0.001051	0.282736
72	syenogranite	221	Huaniushan	B070822-4-11	0.029499	0.001043	0.282774
73	syenogranite	221	Huaniushan	B070822-4-12	0.034381	0.001104	0.282801
74	syenogranite	221	Huaniushan	B070822-4-13	0.033395	0.001164	0.282766
75	syenogranite	221	Huaniushan	B070822-4-14	0.029431	0.000984	0.282724
76	syenogranite	221	Huaniushan	B070822-4-15	0.023449	0.000844	0.282775
77	syenogranite	221	Huaniushan	B070822-4-16	0.027159	0.000979	0.282754
78	syenogranite	221	Huaniushan	B070822-4-17	0.028036	0.001008	0.282751
79	syenogranite	221	Huaniushan	B070822-4-18	0.024426	0.001002	0.282756
80	syenogranite	221	Huaniushan	B070822-4-19	0.022695	0.000774	0.282735
81	syenogranite	221	Huaniushan	B070822-4-20	0.057257	0.001861	0.282759
82	syenogranite	223	Changliushui	B80628-3-1	0.041392	0.001001	0.282667
83	syenogranite	223	Changliushui	B80628-3-2	0.033011	0.000792	0.282695
84	syenogranite	223	Changliushui	B80628-3-3	0.025806	0.000648	0.282685
85	syenogranite	223	Changliushui	B80628-3-4	0.028389	0.000675	0.282727
86	syenogranite	223	Changliushui	B80628-3-5	0.036173	0.000822	0.282705
87	syenogranite	223	Changliushui	B80628-3-6	0.02272	0.000559	0.28271
88	syenogranite	223	Changliushui	B80628-3-7	0.026911	0.000696	0.282691
89	syenogranite	223	Changliushui	B80628-3-8	0.024787	0.000667	0.2827
90	syenogranite	223	Changliushui	B80628-3-9	0.047175	0.001311	0.282713
91	syenogranite	223	Changliushui	B80628-3-10	0.031024	0.000831	0.2827
92	syenogranite	223	Changliushui	B80628-3-11	0.032823	0.000852	0.282703
93	syenogranite	223	Changliushui	B80628-3-12	0.032668	0.000933	0.282736
94	syenogranite	223	Changliushui	B80628-3-13	0.084414	0.002412	0.282676
95	syenogranite	223	Changliushui	B80628-3-14	0.029677	0.000775	0.282682
96	syenogranite	223	Changliushui	B80628-3-15	0.028793	0.000782	0.282686
97	syenogranite	223	Changliushui	B80628-3-16	0.047872	0.001246	0.282603
98	syenogranite	223	Changliushui	B80628-3-17	0.034887	0.000951	0.282708
99	syenogranite	223	Changliushui	B80628-3-18	0.025445	0.000633	0.282661
100	syenogranite	223	Changliushui	B80628-3-19	0.030707	0.000829	0.282689
101	syenogranite	223	Changliushui	B80628-3-20	0.022626	0.000594	0.282694
102	syenogranite	223	Changliushui	B80628-3-21	0.028535	0.000705	0.282714
103	monzogranite	224	Baixianishan	MSD09821-6.1-1	0.065949	0.001761	0.282754
104	monzogranite	224	Baixianishan	MSD09821-6.1-2	0.115162	0.003326	0.282732
105	monzogranite	224	Baixianishan	MSD09821-6.1-3	0.076075	0.001491	0.282812
106	monzogranite	224	Baixianishan	MSD09821-6.1-4	0.096815	0.002256	0.282742
107	monzogranite	224	Baixianishan	MSD09821-6.1-6	0.064254	0.001561	0.282739
108	monzogranite	224	Baixianishan	MSD09821-6.1-7	0.076837	0.001752	0.282717
109	porphyritic quartz syenite	225	Daquan	DQ09819-8-1	0.031754	0.000642	0.282633
110	porphyritic quartz syenite	225	Daquan	DQ09819-8-2	0.034763	0.000797	0.282706
111	porphyritic quartz syenite	225	Daquan	DQ09819-8-3	0.045977	0.000974	0.282627
112	porphyritic quartz syenite	225	Daquan	DQ09819-8-4	0.034275	0.000747	0.28273
113	porphyritic quartz syenite	225	Daquan	DQ09819-8-5	0.028895	0.000642	0.282683
114	porphyritic quartz syenite	225	Daquan	DQ09819-8-6	0.045263	0.000991	0.282686
115	porphyritic quartz syenite	225	Daquan	DQ09819-8-7	0.027259	0.000585	0.282666
116	porphyritic quartz syenite	225	Daquan	DQ09819-8-8	0.027605	0.000581	0.282641
117	porphyritic quartz syenite	225	Daquan	DQ09819-8-9	0.025971	0.00057	0.282689
118	porphyritic quartz syenite	225	Daquan	DQ09819-8-10	0.029055	0.000618	0.282685
119	porphyritic quartz syenite	225	Daquan	DQ09819-8-11	0.025162	0.00054	0.28272
120	porphyritic quartz syenite	225	Daquan	DQ09819-8-12	0.031323	0.000661	0.282685
121	granodiorite	240	Dahuoluo	B70817-2.3-1	0.021526	0.000573	0.28263
122	granodiorite	240	Dahuoluo	B70817-2.3-2	0.030748	0.001029	0.282685
123	granodiorite	240	Dahuoluo	B70817-2.3-3	0.013466	0.000325	0.282782
124	granodiorite	240	Dahuoluo	B70817-2.3-4	0.056393	0.001325	0.282799
125	granodiorite	240	Dahuoluo	B70817-2.3-5	0.045702	0.001067	0.282779
126	granodiorite	240	Dahuoluo	B70817-2.3-6	0.020319	0.000519	0.282733
127	granodiorite	240	Dahuoluo	B70817-2.3-7	0.042685	0.001273	0.282748
128	granodiorite	240	Dahuoluo	B70817-2.3-8	0.022894	0.00059	0.282739
129	granodiorite	240	Dahuoluo	B70817-2.3-9	0.015408	0.000422	0.282744
130	granodiorite	240	Dahuoluo	B70817-2.3-11	0.023551	0.000867	0.282727
131	granodiorite	240	Dahuoluo	B70817-2.3-12	0.023691	0.000835	0.282737
132	granodiorite	255	Dahuoluo	B70817-2.3-14	0.018649	0.000544	0.282767
133	granite	256.5	Xiaoxigang	BS47-2.1	0.017077	0.000650394	0.282801
134	granite	258.286	Qiaowan	16BS092-04	0.0383639	0.00158808	0.282815
135	granite	258.382	Qiaowan	16BS092-07	0.0380346	0.0012281	0.28283
136	granite	259	Xiaoxigang	DJQ11-9-18	0.0425169	0.00169887	0.282752
137	granodiorite	259	Jiujing	16BS070-1-16	0.0339218	0.00119387	0.282744
138	granite	259.89	Qiaowan	16BS092-03	0.0504703	0.00129453	0.282697
139	granodiorite	260	Hazhu	02TW32-3	0.0589	0.0017	0.282898
140	granodiorite	260	Jiujing	16BS070-1-12	0.0195505	0.000729512	0.282729
141	granite	260.1	Xiaoxigang	BS47-6.5	0.0264999	0.0010126	0.282821
142	granite	260.771	Qiaowan	16BS092-05	0.0406735	0.00103466	0.28281
143	granite	261	Xiaoxigang	DJQ11-9-11	0.0458977	0.00177982	0.28274
144	granite	261	Xiaoxigang	DJQ11-9-22	0.0265357	0.00106298	0.282751
145	granodiorite	261	Hazhu	02TW32-1	0.0715	0.002	0.282704
146	granodiorite	261	Hazhu	02TW32-2	0.074	0.0021	0.282858
147	granodiorite	261	Hazhu	02TW32-4	0.0614	0.0018	0.282905
148	granodiorite	261	Hazhu	02TW32-8	0.0284	0.0008	0.282928
149	granodiorite	261	Hazhu	02TW32-16	0.0846	0.0019	0.282916
150	granite	262	Xiaoxigang	DJQ11-9-14	0.0261441	0.00111887	0.282759
151	granodiorite	262	Hazhu	02TW32-6	0.0466	0.0013	0.282907
152	granodiorite	262	Hazhu	02TW32-12	0.0724	0.0018	0.282901
153	granite	262.6	Xiaoxigang	BS47-2.2	0.0311277	0.00111345	0.282856
154	granodiorite	263	Hazhu	02TW32-9	0.0926	0.0023	0.282896
155	granodiorite	263	Hazhu	02TW32-10	0.0599	0.0015	0.282958
156	granodiorite	263	Hazhu	02TW32-14	0.0616	0.0015	0.282981
157	granodiorite	263	Hazhu	02TW32-15	0.0707	0.0017	0.283004
158	granite	263	Qiaowan	BS07-35-01	0.041551	0.001625	0.282676
159	granite	263	Qiaowan	BS07-35-02	0.032579	0.0013	0.282689
160	granite	263	Qiaowan	BS07-35-03	0.047961	0.00188	0.282652
161	granite	263	Qiaowan	BS07-35-04	0.031016	0.001235	0.282664
162	granite	263	Qiaowan	BS07-35-05	0.121574	0.004165	0.282711
163	granite	263	Qiaowan	BS07-35-06	0.051875	0.002045	0.282741
164	granite	263	Qiaowan	BS07-35-07	0.035121	0.001381	0.28269
165	granite	263	Qiaowan	BS07-35-08	0.023572	0.000946	0.282675
166	granite	263	Qiaowan	BS07-35-09	0.208912	0.007764	0.282745
167	granite	263	Qiaowan	BS07-35-10	0.084654	0.003032	0.282701
168	granite	263	Qiaowan	BS07-35-11	0.036926	0.001399	0.282672
169	granite	263	Qiaowan	BS07-35-12	0.056114	0.002094	0.282704
170	granite	263	Qiaowan	BS07-35-13	0.047677	0.001803	0.282701
171	granite	263	Qiaowan	BS07-35-14	0.035607	0.00138	0.28271
172	granite	263	Qiaowan	BS07-35-15	0.112262	0.003461	0.282743
173	granite	263	Qiaowan	BS07-35-16	0.032357	0.001249	0.282685
174	granite	263	Qiaowan	BS07-35-17	0.106319	0.003268	0.282722
175	granite	263	Qiaowan	BS07-35-18	0.068804	0.002441	0.282726
176	granite	263	Qiaowan	BS07-35-19	0.032454	0.001281	0.28271
177	granite	263	Qiaowan	BS07-35-20	0.068628	0.002496	0.282718
178	granite	263.5	Xiaoxigang	BS47-2.3	0.0172001	0.000595498	0.28288
179	granite	264	Xiaoxigang	DJQ11-9-01	0.0199468	0.000851427	0.282777
180	granodiorite	264	Hazhu	02TW32-7	0.142	0.0031	0.282921
181	granodiorite	264	Hazhu	02TW32-13	0.0801	0.0019	0.282896
182	granite	264.2	Xiaoxigang	BS47-2.5	0.0206999	0.000754515	0.282804
183	granite	265	Xiaoxigang	BS47-6.6	0.0277705	0.000983873	0.2828
184	granodiorite	265	Hazhu	02TW32-5	0.0562	0.0017	0.282838
185	granodiorite	265	Hazhu	02TW32-11	0.077	0.0021	0.282898
186	granite	266	Xiaoxigang	DJQ11-9-20	0.0319704	0.00130975	0.282781
187	granite	266	Xiaoxigang	BS47-6.17	0.0410012	0.00140647	0.282828
188	monzogranite	266	Hazhu	02TW19-15	0.0535	0.0015	0.282947
189	granodiorite	266	Dahuoluo	B70817-2.3-13	0.01872	0.000644	0.282717
190	monzogranite	266.1	Xijianquanzi	121-01	0.041551	0.001625	0.282669
191	monzogranite	266.1	Xijianquanzi	121-02	0.032579	0.0013	0.282684
192	monzogranite	266.1	Xijianquanzi	121-03	0.047961	0.00188	0.282643
193	monzogranite	266.1	Xijianquanzi	121-04	0.031016	0.001235	0.282658
194	monzogranite	266.1	Xijianquanzi	121-05	0.121574	0.004165	0.282698
195	monzogranite	266.1	Xijianquanzi	121-06	0.051875	0.002045	0.282731
196	monzogranite	266.1	Xijianquanzi	121-07	0.035121	0.001381	0.282682
197	monzogranite	266.1	Xijianquanzi	121-08	0.023572	0.000946	0.28267
198	monzogranite	266.1	Xijianquanzi	121-09	0.208912	0.007764	0.28272
199	monzogranite	266.1	Xijianquanzi	121-10	0.084654	0.003032	0.282688
200	monzogranite	266.1	Xijianquanzi	121-11	0.036926	0.001399	0.282665
201	monzogranite	266.1	Xijianquanzi	121-12	0.056114	0.002094	0.282695
202	monzogranite	266.1	Xijianquanzi	121-13	0.047677	0.001803	0.282692
203	monzogranite	266.1	Xijianquanzi	121-14	0.035607	0.00138	0.282703
204	monzogranite	266.1	Xijianquanzi	121-15	0.112262	0.003461	0.282724
205	monzogranite	266.1	Xijianquanzi	121-16	0.032357	0.001249	0.282679
206	monzogranite	266.1	Xijianquanzi	121-17	0.106319	0.003268	0.282706
207	monzogranite	266.1	Xijianquanzi	121-18	0.068804	0.002441	0.282715
208	monzogranite	266.1	Xijianquanzi	121-19	0.032454	0.001281	0.282704
209	monzogranite	266.1	Xijianquanzi	121-20	0.068628	0.002496	0.282705
210	granite	267	Xiaoxigang	DJQ11-9-10	0.0266133	0.00110641	0.28277
211	granite	267	Xiaoxigang	DJQ11-9-12	0.0225648	0.000926247	0.282793
212	granite	267	Xiaoxigang	DJQ11-9-13	0.0196343	0.000824436	0.28277
213	monzogranite	267	Hazhu	02TW19-10	0.0988	0.0029	0.28311
214	granite	267.1	Xiaoxigang	BS47-6.10	0.017991	0.000660098	0.282782
215	granite	267.1	Xiaoxigang	BS47-6.23	0.0190835	0.000680009	0.282808
216	granite	267.6	Xiaoxigang	BS47-6.16	0.019932	0.000737483	0.282853
217	granite	267.9	Xiaoxigang	BS47-2.19	0.0183223	0.00067126	0.28284
218	granite	268	Xiaoxigang	DJQ11-9-03	0.0351374	0.00140541	0.282764
219	granite	268	Xiaoxigang	DJQ11-9-07	0.0360248	0.00134044	0.282783
220	granite	268	Xiaoxigang	DJQ11-9-15	0.0555636	0.00202406	0.282751
221	granite	268.6	Xiaoxigang	BS47-2.7	0.0302511	0.00107224	0.282894
222	granite	269	Xiaoxigang	DJQ11-9-04	0.0266062	0.00105619	0.282768
223	granite	269	Xiaoxigang	DJQ11-9-06	0.0243587	0.000983239	0.282778
224	granite	269	Xiaoxigang	DJQ11-9-08	0.0298875	0.00125619	0.282774
225	granite	269	Xiaoxigang	DJQ11-9-09	0.0379587	0.00153736	0.28277
226	granite	269	Xiaoxigang	DJQ11-9-16	0.0266628	0.00106868	0.282776
227	granite	269	Xiaoxigang	DJQ11-9-21	0.0296286	0.00123269	0.282763
228	granite	269	Xiaoxigang	DJQ11-9-26	0.0271322	0.00113645	0.28277
229	granite	269	Xiaoxigang	BS47-6.22	0.0249104	0.000950116	0.282846
230	dioritic dike	269	Yinaoxia	BS03-6.12	0.0606455	0.00225468	0.282815
231	monzogranite	269	Hazhu	02TW19-6	0.0729	0.0021	0.282982
232	monzogranite	269	Hazhu	02TW19-11	0.0613	0.0017	0.282903
233	monzogranite	269	Hazhu	02TW19-12	0.0637	0.0018	0.282968
234	monzogranite	269	Hazhu	02TW19-14	0.0577	0.0016	0.28299
235	granite	269.2	Xiaoxigang	BS47-2.4	0.0261535	0.000994118	0.282882
236	granite	269.4	Xiaoxigang	BS47-6.21	0.0146123	0.000532291	0.28277
237	granite	269.5	Xiaoxigang	BS47-6.20	0.0237022	0.000920609	0.282867
238	granite	270	Xiaoxigang	DJQ11-9-19	0.0374471	0.0014718	0.282753
239	dioritic dike	270	Yinaoxia	BS03-6.4	0.0526555	0.00184425	0.282702
240	dioritic dike	270	Yinaoxia	BS03-6.6	0.0518247	0.00191373	0.282775
241	dioritic dike	270	Yinaoxia	BS03-6.7	0.0479916	0.00180646	0.282801
242	dioritic dike	270	Yinaoxia	BS03-6.9	0.0539707	0.00213227	0.282818
243	dioritic dike	270	Yinaoxia	BS03-6.11	0.0474613	0.00195633	0.282781
244	dioritic dike	270	Yinaoxia	BS03-6.14	0.0412704	0.00156394	0.282817
245	dioritic dike	270	Yinaoxia	BS03-6.15	0.0457968	0.00165831	0.282783
246	monzogranite	270	Hazhu	02TW19-3	0.0561	0.0016	0.282957
247	monzogranite	270	Hazhu	02TW19-5	0.0837	0.0024	0.282997
248	monzogranite	270	Hazhu	02TW19-9	0.0847	0.0026	0.28291
249	granite	270.6	Xiaoxigang	BS47-6.4	0.0205553	0.000753861	0.282812
250	granite	271	Xiaoxigang	BS47-6.3	0.0203473	0.000732692	0.282837
251	dioritic dike	271	Yinaoxia	BS03-5.3	0.0356401	0.0014596	0.282702
252	dioritic dike	271	Yinaoxia	BS03-6.3	0.0300957	0.00114911	0.28274
253	dioritic dike	271	Yinaoxia	BS03-6.5	0.054995	0.00206981	0.28272
254	dioritic dike	271	Yinaoxia	BS03-6.10	0.0684704	0.00243358	0.282773
255	dioritic dike	271	Yinaoxia	BS03-6.16	0.0340815	0.00138897	0.282873
256	monzogranite	271	Hazhu	02TW19-1	0.0587	0.0017	0.282963
257	monzogranite	271	Hazhu	02TW19-4	0.0797	0.0022	0.282935
258	monzogranite	271	Hazhu	02TW19-7	0.1456	0.004	0.282855
259	monzogranite	271	Hazhu	02TW19-13	0.046	0.0014	0.282986
260	monzogranite	271	Hazhu	02TW19-16	0.0495	0.0013	0.283008
261	granite	271.5	Xiaoxigang	BS47-2.6	0.034621	0.00118406	0.282871
262	dioritic dike	272	Yinaoxia	BS03-6.2	0.0376735	0.0014661	0.282761
263	gneiss	272	Baidunzi	X10-37-1-02	0.102541	0.002189	0.282783
264	granite	272.4	Xiaoxigang	BS47-2.13	0.0246894	0.000914022	0.282853
265	granite	272.6	Xiaoxigang	BS47-6.14	0.0362949	0.0013595	0.282791
266	dioritic dike	273	Yinaoxia	BS03-6.8	0.0583993	0.00214631	0.282724
267	orthogneiss	273	Shibandun	14SBD04-2	0.0184187	0.000822092	0.282735
268	gneiss	273	Baidunzi	X10-37-1-12	0.100573	0.001825	0.282757
269	granite	273.3	Xiaoxigang	BS47-6.2	0.0384938	0.00137241	0.282866
270	dioritic dike	274	Yinaoxia	BS03-6.13	0.0498998	0.00194381	0.282764
271	granite	274.7	Xiaoxigang	BS47-2.18	0.0205627	0.000749776	0.282838
272	granite	275	Xiaoxigang	BS47-2.11	0.028783	0.00102528	0.282802
273	monzogranite	275	Hazhu	02TW19-8	0.0612	0.0018	0.282968
274	syenogranite	275	Wufengshan	B80628-8.2-1	0.097862	0.001948	0.282864
275	syenogranite	275	Wufengshan	B80628-8.2-2	0.126804	0.002254	0.282857
276	syenogranite	275	Wufengshan	B80628-8.2-3	0.190195	0.003248	0.282887
277	syenogranite	275	Wufengshan	B80628-8.2-4	0.273269	0.004627	0.282883
278	syenogranite	275	Wufengshan	B80628-8.2-5	0.124319	0.002271	0.282791
279	syenogranite	275	Wufengshan	B80628-8.2-6	0.078688	0.001576	0.282882
280	syenogranite	275	Wufengshan	B80628-8.2-7	0.127519	0.002545	0.282764
281	syenogranite	275	Wufengshan	B80628-8.2-8	0.068281	0.001374	0.282791
282	syenogranite	275	Wufengshan	B80628-8.2-9	0.309064	0.005301	0.2828
283	syenogranite	275	Wufengshan	B80628-8.2-10	0.190534	0.003414	0.282709
284	syenogranite	275	Wufengshan	B80628-8.2-11	0.223864	0.004993	0.282723
285	syenogranite	275	Wufengshan	B80628-8.2-12	0.200581	0.00367	0.282758
286	syenogranite	275	Wufengshan	B80628-8.2-13	0.134539	0.003001	0.282723
287	syenogranite	275	Wufengshan	B80628-8.2-14	0.09064	0.001846	0.282839
288	syenogranite	275	Wufengshan	B80628-8.2-15	0.166352	0.003134	0.282843
289	granite	275.1	Xiaoxigang	BS47-2.10	0.0247579	0.00090582	0.282848
290	granite	275.1	Xiaoxigang	BS47-6.11	0.0365938	0.00129128	0.282877
291	granite	275.2	Xiaoxigang	BS47-2.12	0.0194389	0.00071007	0.282792
292	granite	275.7	Xiaoxigang	BS47-2.9	0.025097	0.000894518	0.282803
293	granite	275.9	Xiaoxigang	BS47-6.15	0.0295731	0.0010638	0.282755
294	monzogranite	276	Hazhu	02TW19-2	0.082	0.0023	0.282996
295	gneiss	276	Baidunzi	X10-37-1-22	0.095207	0.001621	0.282713
296	granite	277	Xiaoxigang	BS47-6.8	0.0474403	0.00172057	0.282796
297	dioritic dike	277	Yinaoxia	BS03-10.18	0.0372265	0.00150343	0.282744
298	gneissic monzogranite	277	Dongdaquan	DDQ09824-3-1	0.0275066	0.0009	0.282453
299	gneissic monzogranite	277	Dongdaquan	DDQ09824-3-2	0.101328	0.003528	0.282714
300	gneissic monzogranite	277	Dongdaquan	DDQ09824-3-3	0.0427331	0.001196	0.282575
301	gneissic monzogranite	277	Dongdaquan	DDQ09824-3-4	0.136135	0.003718	0.282714
302	gneissic monzogranite	277	Dongdaquan	DDQ09824-3-5	0.0623795	0.001724	0.282672
303	gneissic monzogranite	277	Dongdaquan	DDQ09824-3-6	0.0939786	0.002706	0.282679
304	gneissic monzogranite	277	Dongdaquan	DDQ09824-3-7	0.145961	0.004081	0.282675
305	gneissic monzogranite	277	Dongdaquan	DDQ09824-3-8	0.0525567	0.001658	0.282677
306	gneissic monzogranite	277	Dongdaquan	DDQ09824-3-9	0.153603	0.004206	0.282693
307	gneissic monzogranite	277	Dongdaquan	DDQ09824-3-10	0.0789385	0.002584	0.282719
308	gneissic monzogranite	277	Dongdaquan	DDQ09824-3-11	0.109166	0.003638	0.282679
309	gneissic monzogranite	277	Dongdaquan	DDQ09824-3-12	0.0541456	0.001698	0.28256
310	gneissic monzogranite	277	Dongdaquan	DDQ09824-3-13	0.043301	0.001489	0.282594
311	granite	277.6	Xiaoxigang	BS47-2.14	0.0439302	0.00159164	0.282906
312	granite	277.6	Xiaoxigang	BS47-6.12	0.0372096	0.00137853	0.28293
313	dioritic dike	278	Yinaoxia	BS03-5.13	0.0352399	0.00141706	0.282767
314	dioritic dike	278	Yinaoxia	BS03-5.14	0.0363997	0.00140368	0.28274
315	dioritic dike	278	Yinaoxia	BS03-5.24	0.0283008	0.00110925	0.28278
316	granite	278.8	Xiaoxigang	BS47-2.16	0.0344332	0.00124251	0.282757
317	dioritic dike	279	Yinaoxia	BS03-5.1	0.0349289	0.00137929	0.282731
318	dioritic dike	279	Yinaoxia	BS03-5.18	0.0326585	0.00131807	0.282721
319	dioritic dike	279	Yinaoxia	BS03-10.5	0.0434668	0.00168608	0.282817
320	mylonitic granite	279	Dongdaquan	DDQ09824-2.1-1	0.0517725	0.001115	0.28267
321	mylonitic granite	279	Dongdaquan	DDQ09824-2.1-2	0.080346	0.001775	0.282711
322	mylonitic granite	279	Dongdaquan	DDQ09824-2.1-3	0.0610412	0.001732	0.282629
323	mylonitic granite	279	Dongdaquan	DDQ09824-2.1-4	0.0797285	0.001924	0.282638
324	mylonitic granite	279	Dongdaquan	DDQ09824-2.1-5	0.0685642	0.001597	0.282629
325	mylonitic granite	279	Dongdaquan	DDQ09824-2.1-6	0.0491264	0.001263	0.282668
326	mylonitic granite	279	Dongdaquan	DDQ09824-2.1-7	0.0606393	0.001417	0.28264
327	mylonitic granite	279	Dongdaquan	DDQ09824-2.1-8	0.0546775	0.001276	0.282663
328	mylonitic granite	279	Dongdaquan	DDQ09824-2.1-9	0.0905885	0.002207	0.282663
329	mylonitic granite	279	Dongdaquan	DDQ09824-2.1-10	0.0502914	0.001193	0.282623
330	mylonitic granite	279	Dongdaquan	DDQ09824-2.1-11	0.0460462	0.000968	0.282676
331	mylonitic granite	279	Dongdaquan	DDQ09824-2.1-12	0.0542651	0.001105	0.28273
332	mylonitic granite	279	Dongdaquan	DDQ09824-2.1-13	0.0746078	0.001522	0.28263
333	syenogranite	279	Dongdaquan	DDQ09824-1.1-1	0.108966	0.002313	0.282708
334	syenogranite	279	Dongdaquan	DDQ09824-1.1-2	0.087142	0.001911	0.282752
335	syenogranite	279	Dongdaquan	DDQ09824-1.1-4	0.123881	0.003154	0.282571
336	syenogranite	279	Dongdaquan	DDQ09824-1.1-5	0.077471	0.001587	0.282815
337	syenogranite	279	Dongdaquan	DDQ09824-1.1-6	0.088076	0.001998	0.282713
338	syenogranite	279	Dongdaquan	DDQ09824-1.1-7	0.072216	0.001712	0.28274
339	syenogranite	279	Dongdaquan	DDQ09824-1.1-8	0.07338	0.001829	0.282695
340	syenogranite	279	Dongdaquan	DDQ09824-1.1-9	0.111072	0.002748	0.282788
341	syenogranite	279	Dongdaquan	DDQ09824-1.1-10	0.105898	0.002627	0.282639
342	syenogranite	279	Dongdaquan	DDQ09824-1.1-11	0.065235	0.001538	0.282714
343	syenogranite	279	Dongdaquan	DDQ09824-1.1-12	0.099532	0.002267	0.282763
344	syenogranite	279	Dongdaquan	DDQ09824-1.1-13	0.118691	0.00238	0.282777
345	diorite	279.7	Bijiashan	HSS12-1		0.002938	0.282671
346	diorite	279.7	Bijiashan	HSS12-2		0.002061	0.282642
347	diorite	279.7	Bijiashan	HSS12-3		0.005139	0.2828
348	diorite	279.7	Bijiashan	HSS12-4		0.002176	0.282681
349	diorite	279.7	Bijiashan	HSS12-5		0.002542	0.282753
350	diorite	279.7	Bijiashan	HSS12-6		0.002554	0.282815
351	diorite	279.7	Bijiashan	HSS12-7		0.003734	0.282723
352	diorite	279.7	Bijiashan	HSS12-8		0.002469	0.282634
353	diorite	279.7	Bijiashan	HSS12-9		0.001341	0.282733
354	diorite	279.7	Bijiashan	HSS12-10		0.002216	0.282653
355	diorite	279.7	Bijiashan	HSS12-11		0.003175	0.28271
356	diorite	279.7	Bijiashan	HSS12-12		0.002776	0.282668
357	diorite	279.7	Bijiashan	HSS12-13		0.002959	0.282792
358	diorite	279.7	Bijiashan	HSS12-14		0.001588	0.282752
359	diorite	279.7	Bijiashan	HSS12-15		0.002929	0.282782
360	diorite	279.7	Bijiashan	HSS12-16		0.001535	0.282719
361	diorite	279.7	Bijiashan	HSS12-17		0.002502	0.282831
362	diorite	279.7	Bijiashan	HSS12-18		0.002177	0.282685
363	diorite	279.7	Bijiashan	HSS12-19		0.002426	0.282712
364	dioritic dike	280	Yinaoxia	BS03-5.2	0.0353648	0.00135445	0.282659
365	dioritic dike	280	Yinaoxia	BS03-5.6	0.0688765	0.00269963	0.282756
366	dioritic dike	280	Yinaoxia	BS03-5.10	0.0458866	0.00182624	0.282674
367	dioritic dike	280	Yinaoxia	BS03-5.23	0.0406537	0.00152323	0.282738
368	dioritic dike	280	Yinaoxia	BS03-10.2	0.0767562	0.00286031	0.282789
369	dioritic dike	280	Yinaoxia	BS03-10.3	0.0380094	0.00146157	0.282812
370	dioritic dike	280	Yinaoxia	BS03-10.6	0.0615338	0.00229768	0.282793
371	dioritic dike	280	Yinaoxia	BS03-10.8	0.0399524	0.00153375	0.282726
372	dioritic dike	280	Yinaoxia	BS03-10.19	0.0295129	0.00117358	0.282708
373	gneiss	280	Baidunzi	X10-37-1-05	0.146296	0.003055	0.282817
374	granite	280.1	Xiaoxigang	BS47-2.17	0.0234484	0.000861651	0.282738
375	dioritic dike	281	Yinaoxia	BS03-5.4	0.0477268	0.0019284	0.282684
376	dioritic dike	281	Yinaoxia	BS03-5.9	0.0250629	0.00102886	0.282704
377	dioritic dike	281	Yinaoxia	BS03-5.15	0.0291637	0.00118019	0.282791
378	dioritic dike	281	Yinaoxia	BS03-5.19	0.0280718	0.00111776	0.282798
379	dioritic dike	281	Yinaoxia	BS03-10.1	0.044308	0.00174937	0.282784
380	dioritic dike	281	Yinaoxia	BS03-10.10	0.0320715	0.00128674	0.282734
381	dioritic dike	281	Yinaoxia	BS03-10.14	0.0267468	0.00110093	0.282718
382	dioritic dike	281	Yinaoxia	BS03-10.16	0.0497363	0.00193524	0.282702
383	dioritic dike	281	Yinaoxia	BS03-10.20	0.0252826	0.0010636	0.282795
384	dioritic dike	281	Yinaoxia	BS03-10.22	0.0397842	0.00161676	0.282812
385	quartz diorite	281	Shuangjingzi	X10-46-1-01	0.0205422	0.000735431	0.282867
386	quartz diorite	281	Shuangjingzi	X10-46-1-02	0.0208427	0.000726037	0.282939
387	quartz diorite	281	Shuangjingzi	X10-46-1-03	0.0181744	0.000609888	0.282922
388	quartz diorite	281	Shuangjingzi	X10-46-1-04	0.0318677	0.00106269	0.282951
389	quartz diorite	281	Shuangjingzi	X10-46-1-05	0.0230404	0.000760082	0.282881
390	quartz diorite	281	Shuangjingzi	X10-46-1-06	0.0333465	0.00109147	0.282931
391	quartz diorite	281	Shuangjingzi	X10-46-1-07	0.0271631	0.000909518	0.282869
392	quartz diorite	281	Shuangjingzi	X10-46-1-08	0.0301177	0.00113117	0.282905
393	quartz diorite	281	Shuangjingzi	X10-46-1-10	0.0219246	0.000779158	0.282915
394	quartz diorite	281	Shuangjingzi	X10-46-1-12	0.0216647	0.000745115	0.282923
395	quartz diorite	281	Shuangjingzi	X10-46-1-13	0.0330064	0.00112497	0.282923
396	quartz diorite	281	Shuangjingzi	X10-46-1-14	0.0175015	0.000598013	0.282928
397	quartz diorite	281	Shuangjingzi	X10-46-1-16	0.0124886	0.000485671	0.282897
398	quartz diorite	281	Shuangjingzi	X10-46-1-17	0.0168028	0.000578654	0.282902
399	quartz diorite	281	Shuangjingzi	X10-46-1-19	0.0285865	0.00102452	0.28292
400	quartz diorite	281	Shuangjingzi	X10-46-1-20	0.0411943	0.00149272	0.282947
401	quartz diorite	281	Shuangjingzi	X10-46-1-22	0.0163361	0.000584862	0.28293
402	quartz diorite	281	Shuangjingzi	X10-46-1-23	0.0322806	0.00107105	0.282944
403	quartz diorite	281	Shuangjingzi	X10-46-1-25	0.0264065	0.000906177	0.282907
404	quartz diorite	281	Shuangjingzi	X10-46-1-26	0.024649	0.000932923	0.28291
405	quartz diorite	281	Shuangjingzi	X10-46-1-27	0.0305484	0.0011206	0.282918
406	quartz diorite	281	Shuangjingzi	X10-46-1-28	0.0167338	0.00060629	0.282881
407	quartz diorite	281	Shuangjingzi	X10-46-1-29	0.0205748	0.000710669	0.282892
408	gneiss	281	Baidunzi	X10-37-1-17	0.132497	0.002713	0.282755
409	granite	281.7	Yinaoxia	151-01	0.054372	0.002172	0.282765
410	granite	281.7	Yinaoxia	151-02	0.034994	0.001475	0.282762
411	granite	281.7	Yinaoxia	151-03	0.053056	0.002256	0.282767
412	granite	281.7	Yinaoxia	151-04	0.041019	0.00169	0.282718
413	granite	281.7	Yinaoxia	151-05	0.045366	0.001855	0.282743
414	granite	281.7	Yinaoxia	151-06	0.026541	0.001123	0.282754
415	granite	281.7	Yinaoxia	151-07	0.054124	0.002187	0.282757
416	granite	281.7	Yinaoxia	151-08	0.046873	0.001943	0.282769
417	granite	281.7	Yinaoxia	151-09	0.037046	0.001562	0.282798
418	granite	281.7	Yinaoxia	151-10	0.04849	0.002126	0.282785
419	granite	281.7	Yinaoxia	151-11	0.030723	0.001363	0.282751
420	granite	281.7	Yinaoxia	151-12	0.056417	0.002495	0.282774
421	granite	281.7	Yinaoxia	151-13	0.038904	0.00169	0.28277
422	granite	281.7	Yinaoxia	151-14	0.06355	0.002608	0.282764
423	granite	281.7	Yinaoxia	151-15	0.053526	0.002262	0.282754
424	granite	281.7	Yinaoxia	151-16	0.033398	0.001502	0.282776
425	granite	281.7	Yinaoxia	151-17	0.024297	0.001143	0.282748
426	granite	281.7	Yinaoxia	151-18	0.107657	0.004769	0.282781
427	granite	281.7	Yinaoxia	151-19	0.054352	0.002283	0.282768
428	granite	281.7	Yinaoxia	151-20	0.045204	0.001974	0.282797
429	granite	281.7	Yinaoxia	151-21	0.031281	0.001328	0.282823
430	dioritic dike	282	Yinaoxia	BS03-5.5	0.0410991	0.00167712	0.282675
431	dioritic dike	282	Yinaoxia	BS03-5.17	0.0493944	0.00191998	0.282678
432	dioritic dike	282	Yinaoxia	BS03-6.1	0.073801	0.00285508	0.282748
433	dioritic dike	282	Yinaoxia	BS03-10.7	0.0424576	0.00170511	0.282734
434	dioritic dike	282	Yinaoxia	BS03-10.13	0.0362836	0.00148034	0.282767
435	dioritic dike	282	Yinaoxia	BS03-10.21	0.0411147	0.00164395	0.282778
436	granodiorite	284	Shuangjingzi	B12-11-1	0.026846	0.000747	0.282902
437	granodiorite	284	Shuangjingzi	Bl 2-11-2	0.037395	0.000964	0.282825
438	granodiorite	284	Shuangjingzi	Bl 2-11-5	0.035445	0.001061	0.282898
439	granodiorite	284	Shuangjingzi	Bl 2-11-6	0.04406	0.001157	0.282945
440	granodiorite	284	Shuangjingzi	Bl 2-11-8	0.041084	0.001083	0.282841
441	granodiorite	284	Shuangjingzi	Bl 2-11-9	0.035853	0.000974	0.282916
442	granodiorite	284	Shuangjingzi	Bl 2-11-11	0.039161	0.001019	0.282903
443	granodiorite	284	Shuangjingzi	Bl 2-11-12	0.035416	0.000895	0.282918
444	granodiorite	284	Shuangjingzi	Bl 2-11-14	0.035326	0.001076	0.282913
445	granodiorite	284	Shuangjingzi	Bl 2-11-16	0.032158	0.000829	0.282934
446	granodiorite	284	Shuangjingzi	Bl 2-11-2 2	0.045523	0.001245	0.282929
447	granodiorite	284	Shuangjingzi	Bl 2-11-2 3	0.033619	0.000926	0.282951
448	granodiorite	284	Shuangjingzi	Bl 2-11-24	0.044961	0.001213	0.282915
449	granodiorite	284	Shuangjingzi	Bl 2-11-2 6	0.042265	0.001201	0.282938
450	granodiorite	284	Shuangjingzi	Bl 2-11-2 7	0.05125	0.001423	0.282901
451	granodiorite	284	Shuangjingzi	Bl 2-11-2 9	0.037755	0.000966	0.28291
452	granite	285	Dongqiyishan	BS07-329-01	0.039092	0.001533	0.282563
453	granite	285	Dongqiyishan	BS07-329-02	0.027098	0.001093	0.282585
454	granite	285	Dongqiyishan	BS07-329-03	0.031463	0.00122	0.282578
455	granite	285	Dongqiyishan	BS07-329-04	0.030719	0.00119	0.282521
456	granite	285	Dongqiyishan	BS07-329-05	0.037949	0.001433	0.282533
457	granite	285	Dongqiyishan	BS07-329-06	0.041895	0.001574	0.282665
458	granite	285	Dongqiyishan	BS07-329-07	0.029701	0.00114	0.282581
459	granite	285	Dongqiyishan	BS07-329-08	0.031602	0.001129	0.282561
460	granite	285	Dongqiyishan	BS07-329-09	0.034271	0.001292	0.282566
461	granite	285	Dongqiyishan	BS07-329-10	0.027232	0.001026	0.282564
462	granite	285	Dongqiyishan	BS07-329-11	0.02498	0.000935	0.282534
463	granite	285	Dongqiyishan	BS07-329-12	0.042987	0.001384	0.282563
464	granite	285	Dongqiyishan	BS07-329-13	0.039225	0.001386	0.282616
465	granite	285	Dongqiyishan	BS07-329-14	0.030399	0.001105	0.282526
466	granite	285	Dongqiyishan	BS07-329-15	0.040872	0.001491	0.282682
467	granite	285	Dongqiyishan	BS07-329-16	0.034607	0.001242	0.282575
468	granite	285	Dongqiyishan	BS07-329-17	0.041398	0.001401	0.282588
469	granite	285	Dongqiyishan	BS07-329-18	0.031053	0.001129	0.282544
470	granite	285	Dongqiyishan	BS07-329-19	0.028448	0.000986	0.282612
471	granite	285	Dongqiyishan	BS07-329-20	0.057125	0.001874	0.282572
472	granite	285	Dongqiyishan	BS07-329-21	0.037177	0.001352	0.28259
473	gneiss	285	Baidunzi	X10-37-1-40	0.058844	0.00111	0.282833
474	orthogneiss	286.3	Shibandun	14SBD04-4	0.0147551	0.000674911	0.282609
475	quartz diorite	287	Shuangjingzi	X10-47-1-01	0.0144331	0.000570992	0.282887
476	quartz diorite	287	Shuangjingzi	X10-47-1-02	0.0301594	0.00115406	0.282866
477	quartz diorite	287	Shuangjingzi	X10-47-1-04	0.0191407	0.000763969	0.282914
478	quartz diorite	287	Shuangjingzi	X10-47-1-06	0.0218526	0.000894005	0.282909
479	quartz diorite	287	Shuangjingzi	X10-47-1-07	0.0167485	0.000644291	0.282897
480	quartz diorite	287	Shuangjingzi	X10-47-1-10	0.0165139	0.000629848	0.282902
481	quartz diorite	287	Shuangjingzi	X10-47-1-11	0.0233925	0.000948162	0.28293
482	quartz diorite	287	Shuangjingzi	X10-47-1-12	0.0154365	0.000651003	0.28294
483	quartz diorite	287	Shuangjingzi	X10-47-1-13	0.026316	0.00105033	0.282918
484	quartz diorite	287	Shuangjingzi	X10-47-1-15	0.0186926	0.000712428	0.282909
485	quartz diorite	287	Shuangjingzi	X10-47-1-17	0.0243813	0.00100605	0.282907
486	quartz diorite	287	Shuangjingzi	X10-47-1-19	0.0199855	0.000803152	0.282915
487	quartz diorite	287	Shuangjingzi	X10-47-1-20	0.033803	0.00136618	0.282972
488	quartz diorite	287	Shuangjingzi	X10-47-1-21	0.0182232	0.000770254	0.282972
489	quartz diorite	287	Shuangjingzi	X10-47-1-25	0.0253677	0.00100656	0.282963
490	quartz diorite	287	Shuangjingzi	X10-47-1-27	0.0231419	0.000910047	0.28291
491	orthogneiss	287.2	Shibandun	14SBD04-17	0.0204939	0.00098172	0.28271
492	orthogneiss	287.2	Shibandun	14SBD04-20	0.0188967	0.000896428	0.282778
493	orthogneiss	288	Shibandun	14SBD04-19	0.0103594	0.000511316	0.282699
494	mylonitic granite	288	Mazongshan	10SYQ08-16	0.050667	0.001766	0.282314
495	gneiss	288	Baidunzi	X10-37-1-23	0.103839	0.001864	0.282753
496	granitic gneiss	288.586	Shibandun	16BS036-12	0.0990247	0.00251297	0.282782
497	orthogneiss	288.9	Shibandun	14SBD04-1	0.0111637	0.000538377	0.282736
498	gneiss	289	Baidunzi	X10-37-1-11	0.102604	0.001749	0.282762
499	granite	290	Yinaoxia	BS07-75-01	0.054372	0.002172	0.282765
500	granite	290	Yinaoxia	BS07-75-02	0.034994	0.001475	0.282762
501	granite	290	Yinaoxia	BS07-75-03	0.053056	0.002256	0.282767
502	granite	290	Yinaoxia	BS07-75-04	0.041019	0.00169	0.282718
503	granite	290	Yinaoxia	BS07-75-05	0.045366	0.001855	0.282743
504	granite	290	Yinaoxia	BS07-75-06	0.026541	0.001123	0.282754
505	granite	290	Yinaoxia	BS07-75-07	0.054124	0.002187	0.282757
506	granite	290	Yinaoxia	BS07-75-08	0.046873	0.001943	0.282769
507	granite	290	Yinaoxia	BS07-75-09	0.037046	0.001562	0.282798
508	granite	290	Yinaoxia	BS07-75-10	0.04849	0.002126	0.282785
509	granite	290	Yinaoxia	BS07-75-11	0.030723	0.001363	0.282751
510	granite	290	Yinaoxia	BS07-75-12	0.056417	0.002495	0.282774
511	granite	290	Yinaoxia	BS07-75-13	0.038904	0.00169	0.28277
512	granite	290	Yinaoxia	BS07-75-14	0.06355	0.002608	0.282764
513	granite	290	Yinaoxia	BS07-75-15	0.053526	0.002262	0.282754
514	granite	290	Yinaoxia	BS07-75-16	0.033398	0.001502	0.282776
515	granite	290	Yinaoxia	BS07-75-17	0.024297	0.001143	0.282748
516	granite	290	Yinaoxia	BS07-75-18	0.107657	0.004769	0.282781
517	granite	290	Yinaoxia	BS07-75-19	0.054352	0.002283	0.282768
518	granite	290	Yinaoxia	BS07-75-20	0.045204	0.001974	0.282797
519	granite	290	Yinaoxia	BS07-75-21	0.031281	0.001328	0.282823
520	orthogneiss	290.4	Shibandun	14SBD04-24	0.0408343	0.00184836	0.282681
521	orthogneiss	290.8	Shibandun	14SBD04-3	0.0250912	0.00107679	0.282645
522	orthogneiss	290.9	Shibandun	14SBD04-23	0.0197341	0.00088708	0.282684
523	felsic vein	291	Baidunzi	X10-37-2-16	0.051057	0.001526	0.282595
524	orthogneiss	291.9	Shibandun	14SBD04-5	0.0191768	0.000877848	0.282765
525	gneiss	292	Baidunzi	X10-37-1-21	0.074217	0.001303	0.282738
526	gneiss	292	Baidunzi	X10-37-1-29	0.0871	0.001547	0.2828
527	gneiss	292	Baidunzi	X10-37-1-48	0.056696	0.001255	0.282807
528	gneiss	292	Baidunzi	X10-37-1-51	0.132517	0.002214	0.282794
529	gneiss	292	Baidunzi	X10-37-1-63	0.078832	0.001485	0.282731
530	orthogneiss	292.4	Shibandun	14SBD04-13	0.0114688	0.000554812	0.282706
531	orthogneiss	293.4	Shibandun	14SBD04-15	0.0124218	0.00059614	0.282705
532	orthogneiss	293.6	Shibandun	14SBD04-11	0.0252535	0.00115673	0.28278
533	orthogneiss	293.8	Shibandun	14SBD04-14	0.0295533	0.00132884	0.282734
534	gneiss	294	Baidunzi	X10-37-1-24	0.058526	0.001091	0.282727
535	felsic vein	294	Baidunzi	X10-37-2-02	0.040971	0.001309	0.282538
536	felsic vein	294	Baidunzi	X10-37-2-05	0.027255	0.000888	0.282563
537	felsic vein	294	Baidunzi	X10-37-2-19	0.048799	0.001451	0.282543
538	orthogneiss	294.1	Shibandun	14SBD04-12	0.0160165	0.000719932	0.282711
539	orthogneiss	294.3	Shibandun	14SBD04-9	0.00827241	0.000406976	0.28271
540	gneiss	295	Baidunzi	X10-37-1-01	0.11134	0.002206	0.282736
541	gneiss	295	Baidunzi	X10-37-1-04	0.083452	0.00137	0.282737
542	felsic vein	295	Baidunzi	X10-37-2-07	0.04691	0.00147	0.282575
543	felsic vein	295	Baidunzi	X10-37-2-10	0.046725	0.001479	0.282607
544	felsic vein	295	Baidunzi	X10-37-2-23	0.059265	0.001778	0.282539
545	gneiss	296	Baidunzi	X10-37-1-09	0.08105	0.001385	0.282762
546	gneiss	296	Baidunzi	X10-37-1-19	0.0653	0.001138	0.282783
547	felsic vein	296	Baidunzi	X10-37-2-09	0.051192	0.001674	0.282561
548	orthogneiss	296.3	Shibandun	14SBD04-16	0.016321	0.000778717	0.282708
549	orthogneiss	296.4	Shibandun	14SBD04-18	0.0128836	0.000614215	0.282684
550	granitic gneiss	297	Hongshishan	10HSS01-6	0.072189	0.002356	0.282871
551	felsic vein	297	Baidunzi	X10-37-2-21	0.044718	0.001399	0.282547
552	orthogneiss	297.4	Shibandun	14SBD04-8	0.0193221	0.000957373	0.282713
553	orthogneiss	298.5	Shibandun	14SBD04-10	0.016254	0.000727545	0.282725
554	felsic vein	299	Baidunzi	X10-37-2-03	0.039512	0.001316	0.282521
555	orthogneiss	299.1	Shibandun	14SBD04-22	0.0170212	0.000799159	0.282692
556	orthogneiss	299.7	Shibandun	14SBD04-6	0.0234451	0.00111344	0.282748
557	orthogneiss	299.9	Shibandun	14SBD06-2	0.0454276	0.00201018	0.282866
558	orthogneiss	300	Shibandun	14SBD06-23	0.0151313	0.000715353	0.282743
559	gneiss	300	Baidunzi	X10-37-1-26	0.114255	0.001998	0.28276
560	gneiss	300	Baidunzi	X10-37-1-28	0.185472	0.003349	0.28279
561	gneiss	300	Baidunzi	X10-37-1-33	0.059903	0.001135	0.282746
562	orthogneiss	300.1	Shibandun	14SBD06-20	0.019082	0.000845755	0.282765
563	orthogneiss	300.3	Shibandun	14SBD06-19	0.0220819	0.000970755	0.282729
564	orthogneiss	300.6	Shibandun	14SBD04-21	0.00750848	0.000384093	0.282728
565	orthogneiss	301.6	Shibandun	14SBD06-11	0.0308168	0.00132768	0.282589
566	felsic vein	302	Baidunzi	X10-37-2-06	0.036113	0.001151	0.282563
567	orthogneiss	302.3	Shibandun	14SBD06-8	0.0196082	0.000859648	0.282601
568	orthogneiss	302.4	Shibandun	14SBD04-7	0.01452	0.000723712	0.282739
569	orthogneiss	302.5	Shibandun	14SBD06-22	0.0248304	0.0011165	0.282669
570	orthogneiss	302.8	Shibandun	14SBD06-9	0.0305727	0.00139914	0.282761
571	granitic gneiss	303	Hongshishan	10HSS01-8	0.060173	0.002116	0.282768
572	tonalite	303	Hazhu	02TW1.8	0.0336	0.0008	0.282727
573	gneiss	303	Baidunzi	X10-37-1-38	0.082575	0.001442	0.282809
574	orthogneiss	303.2	Shibandun	14SBD06-14	0.0284051	0.00125207	0.282749
575	orthogneiss	303.4	Shibandun	14SBD06-12	0.0101781	0.000522783	0.282725
576	granite	303.7	Qiaowan	152-01	0.02226	0.000879	0.282588
577	granite	303.7	Qiaowan	152-02	0.065058	0.002372	0.282629
578	granite	303.7	Qiaowan	152-03	0.064435	0.002357	0.282631
579	granite	303.7	Qiaowan	152-04	0.062716	0.00222	0.282609
580	granite	303.7	Qiaowan	152-05	0.039846	0.001672	0.282634
581	granite	303.7	Qiaowan	152-06	0.008557	0.000334	0.282642
582	granite	303.7	Qiaowan	152-07	0.012372	0.000467	0.282638
583	granite	303.7	Qiaowan	152-08	0.032321	0.001199	0.282611
584	granite	303.7	Qiaowan	152-09	0.017111	0.000636	0.282619
585	granite	303.7	Qiaowan	152-10	0.033448	0.001208	0.282622
586	granite	303.7	Qiaowan	152-11	0.025171	0.001091	0.282663
587	granite	303.7	Qiaowan	152-12	0.045286	0.001732	0.282593
588	granite	303.7	Qiaowan	152-13	0.025908	0.001038	0.282752
589	granite	303.7	Qiaowan	152-14	0.059161	0.002488	0.282709
590	granite	303.7	Qiaowan	152-15	0.028274	0.001037	0.282643
591	granite	303.7	Qiaowan	152-16	0.260524	0.008595	0.282599
592	granite	303.7	Qiaowan	152-17	0.023687	0.000892	0.282656
593	granite	303.7	Qiaowan	152-18	0.020393	0.000758	0.28258
594	granite	303.7	Qiaowan	152-19	0.01665	0.000632	0.282584
595	granite	303.7	Qiaowan	152-20	0.015752	0.000593	0.282583
596	granite	304	Qiaowan	BS07-17-01	0.02226	0.000879	0.282583
597	granite	304	Qiaowan	BS07-17-02	0.065058	0.002372	0.282617
598	granite	304	Qiaowan	BS07-17-03	0.064435	0.002357	0.282618
599	granite	304	Qiaowan	BS07-17-04	0.062716	0.00222	0.282597
600	granite	304	Qiaowan	BS07-17-05	0.039846	0.001672	0.282626
601	granite	304	Qiaowan	BS07-17-06	0.008557	0.000334	0.28264
602	granite	304	Qiaowan	BS07-17-07	0.012372	0.000467	0.282636
603	granite	304	Qiaowan	BS07-17-08	0.032321	0.001199	0.282604
604	granite	304	Qiaowan	BS07-17-09	0.017111	0.000636	0.282616
605	granite	304	Qiaowan	BS07-17-10	0.033448	0.001208	0.282615
606	granite	304	Qiaowan	BS07-17-11	0.025171	0.001091	0.282656
607	granite	304	Qiaowan	BS07-17-12	0.045286	0.001732	0.282585
608	granite	304	Qiaowan	BS07-17-13	0.025908	0.001038	0.282746
609	granite	304	Qiaowan	BS07-17-14	0.059161	0.002488	0.282697
610	granite	304	Qiaowan	BS07-17-15	0.028274	0.001037	0.282637
611	granite	304	Qiaowan	BS07-17-16	0.260524	0.008595	0.282547
612	granite	304	Qiaowan	BS07-17-17	0.023687	0.000892	0.282651
613	granite	304	Qiaowan	BS07-17-18	0.020393	0.000758	0.282576
614	granite	304	Qiaowan	BS07-17-19	0.01665	0.000632	0.282581
615	granite	304	Qiaowan	BS07-17-20	0.015752	0.000593	0.282579
616	orthogneiss	304.3	Shibandun	14SBD06-13	0.055134	0.00246697	0.28277
617	orthogneiss	304.3	Shibandun	14SBD06-17	0.0272923	0.00121019	0.282746
618	orthogneiss	304.6	Shibandun	14SBD06-24	0.0254822	0.00116901	0.282755
619	orthogneiss	305	Shibandun	14SBD06-1	0.0285942	0.00134653	0.282741
620	orthogneiss	305.1	Shibandun	14SBD06-4	0.0143932	0.000669359	0.28273
621	orthogneiss	305.1	Shibandun	14SBD06-10	0.0250227	0.00109921	0.282718
622	orthogneiss	305.6	Shibandun	14SBD06-6	0.0296303	0.00133823	0.282732
623	felsic vein	306	Baidunzi	X10-37-2-15	0.03613	0.001096	0.282579
624	tonalite	307	Hazhu	02TW1.2	0.0368	0.0008	0.282964
625	granitic gneiss	308	Hongshishan	10HSS01-7	0.040932	0.001467	0.28281
626	orthogneiss	308.8	Shibandun	14SBD06-15	0.0169224	0.000800624	0.282721
627	granitic gneiss	309	Hongshishan	10HSS01-3	0.086957	0.002669	0.282909
628	tonalite	309	Hazhu	02TW1.9	0.0549	0.0014	0.28295
629	tonalite	309	Hazhu	02TW1.12	0.0201	0.0005	0.283121
630	tonalite	310	Hazhu	02TW1.5	0.039	0.0009	0.282803
631	tonalite	310	Hazhu	02TW1.14	0.0353	0.0009	0.282956
632	orthogneiss	310.9	Shibandun	14SBD06-16	0.0265	0.00117588	0.282754
633	granitic gneiss	311	Hongshishan	10HSS01-1	0.052031	0.001979	0.282794
634	tonalite	311	Hazhu	02TW1.6	0.0326	0.0008	0.282691
635	tonalite	311	Hazhu	02TW1.7	0.041	0.0009	0.282732
636	tonalite	311	Hazhu	02TW1.13	0.0274	0.0009	0.283211
637	tonalite	311	Hazhu	02TW1.15	0.0201	0.0006	0.282972
638	tonalite	312	Hazhu	02TW1.1	0.0323	0.0007	0.282866
639	tonalite	312	Hazhu	02TW1.11	0.0553	0.0017	0.2831
640	tonalite	312	Hazhu	02TW1.16	0.0291	0.0008	0.283002
641	tonalite	313	Hazhu	02TW1.3	0.0178	0.001	0.282801
642	tonalite	313	Hazhu	02TW1.4	0.0342	0.0008	0.282893
643	orthogneiss	313.8	Shibandun	14SBD06-3	0.0168414	0.000778547	0.28269
644	syenogranite	314	Dongdaquan	DDQ09824-1.1-3	0.098799	0.001962	0.282701
645	tonalite	314	Hazhu	02TW1.10	0.0254	0.0007	0.282776
646	granodiorite	316	Hazhu	7218.2	0.0978	0.0024	0.282986
647	granodiorite	317	Hazhu	7218.3	0.0869	0.0023	0.282879
648	granodiorite	317	Hazhu	7218.1	0.0554	0.0019	0.282791
649	granodiorite	317	Hazhu	7218.15	0.0493	0.0014	0.282933
650	granodiorite	318	Hazhu	7218.1	0.0354	0.001 0	0.282837
651	granodiorite	318	Hazhu	7218.1	0.0515	0.0016	0.282918
652	granodiorite	318	Hazhu	7218.5	0.0819	0.0026	0.282824
653	granodiorite	318	Hazhu	7218.7	0.0647	0.002	0.282824
654	granodiorite	318	Hazhu	7218.11	0.0736	0.0021	0.28283
655	granodiorite	318	Hazhu	7218.11	0.0525	0.0016	0.28284
656	granodiorite	319	Hazhu	7218.6	0.0484	0.0019	0.282848
657	granodiorite	319	Hazhu	7218.8	0.0394	0.0012	0.282841
658	granodiorite	319	Hazhu	7218.9	0.0554	0.0018	0.28289
659	granodiorite	319	Hazhu	7218.16	0.0628	0.0018	0.282858
660	granodiorite	320	Hazhu	7218.13	0.0457	0.0012	0.282865
661	granodiorite	321	Hazhu	7218.12	0.0401	0.0013	0.282856
662	alkine-plagioclase granite	327.6	Shuangjingzi	B12-17-1	0.070591	0.001936	0.282834
663	alkine-plagioclase granite	327.6	Shuangjingzi	Bl2-17-2	0.072155	0.001939	0.282761
664	alkine-plagioclase granite	327.6	Shuangjingzi	Bl2-17-3	0.047956	0.001334	0.28281
665	alkine-plagioclase granite	327.6	Shuangjingzi	Bl2-17-4	0.064774	0.001754	0.282792
666	alkine-plagioclase granite	327.6	Shuangjingzi	Bl 2-17-5	0.059976	0.001618	0.282821
667	alkine-plagioclase granite	327.6	Shuangjingzi	Bl 2-17-6	0.07096	0.001898	0.282832
668	alkine-plagioclase granite	327.6	Shuangjingzi	Bl2-17-7	0.07083	0.001923	0.282838
669	alkine-plagioclase granite	327.6	Shuangjingzi	Bl2-17-9	0.075013	0.001978	0.28282
670	alkine-plagioclase granite	327.6	Shuangjingzi	B12-17-10	0.076708	0.002008	0.282853
671	alkine-plagioclase granite	327.6	Shuangjingzi	Bl 2-17-11	0.075482	0.001927	0.282839
672	alkine-plagioclase granite	327.6	Shuangjingzi	Bl 2-17-12	0.068632	0.001793	0.28287
673	alkine-plagioclase granite	327.6	Shuangjingzi	Bl 2-17-13	0.06872	0.00186	0.282819
674	alkine-plagioclase granite	327.6	Shuangjingzi	B12-17-14	0.038762	0.001055	0.282789
675	alkine-plagioclase granite	327.6	Shuangjingzi	Bl 2-17-15	0.095469	0.00242	0.282769
676	alkine-plagioclase granite	327.6	Shuangjingzi	Bl 2-17-16	0.063995	0.001701	0.282805
677	alkine-plagioclase granite	327.6	Shuangjingzi	Bl 2-17-17	0.064354	0.001853	0.282745
678	alkine-plagioclase granite	327.6	Shuangjingzi	Bl 2-17-18	0.07953	0.002008	0.282808
679	alkine-plagioclase granite	327.6	Shuangjingzi	Bl 2-17-19	0.078403	0.002282	0.282785
680	alkine-plagioclase granite	327.6	Shuangjingzi	Bl 2-17-2 2	0.054084	0.001421	0.282824
681	alkine-plagioclase granite	327.6	Shuangjingzi	Bl 2-17-2 8	0.048212	0.001251	0.282755
682	granodiorite	330	Shuangjingzi	X10-44-1 01	0.0227496	0.00099936	0.282781
683	granodiorite	330	Shuangjingzi	X10-44-1 02	0.0253779	0.00118451	0.282837
684	granodiorite	330	Shuangjingzi	X10-44-1 04	0.0191951	0.000854713	0.282798
685	granodiorite	330	Shuangjingzi	X10-44-1 05	0.0250887	0.0011617	0.282782
686	granodiorite	330	Shuangjingzi	X10-44-1 06	0.028575	0.00133084	0.282796
687	granodiorite	330	Shuangjingzi	X10-44-1 08	0.0235925	0.00107099	0.282799
688	granodiorite	330	Shuangjingzi	X10-44-1 09	0.0244725	0.00113003	0.282737
689	granodiorite	330	Shuangjingzi	X10-44-1 11	0.0214332	0.000995909	0.282785
690	granodiorite	330	Shuangjingzi	X10-44-1 12	0.0523173	0.00218809	0.282821
691	granodiorite	330	Shuangjingzi	X10-44-1 14	0.037631	0.00171321	0.282764
692	quartz diorite	349	Baiheshan	11	0.0263	0.0011	0.282827
693	quartz diorite	349	Baiheshan	16	0.0463	0.0019	0.282742
694	quartz diorite	350	Baiheshan	3	0.0387	0.0016	0.282798
695	quartz diorite	350	Baiheshan	4	0.0405	0.0017	0.282765
696	quartz diorite	350	Baiheshan	5	0.0402	0.0017	0.28282
697	quartz diorite	350	Baiheshan	6	0.035	0.0014	0.282807
698	quartz diorite	350	Baiheshan	14	0.0218	0.0009	0.282774
699	quartz diorite	351	Baiheshan	1	0.0477	0.002	0.282771
700	quartz diorite	351	Baiheshan	2	0.0239	0.001	0.282764
701	quartz diorite	351	Baiheshan	7	0.0494	0.002	0.282734
702	quartz diorite	351	Baiheshan	15	0.0442	0.0018	0.282813
703	quartz diorite	352	Baiheshan	8	0.0422	0.0017	0.282767
704	quartz diorite	352	Baiheshan	9	0.0377	0.0016	0.282791
705	quartz diorite	352	Baiheshan	12	0.0316	0.0013	0.282712
706	quartz diorite	352	Baiheshan	13	0.044	0.0018	0.282797
707	granodiorite	353	Dahuoluo	B70817-2.3-10	0.036414	0.001098	0.282609
708	quartz diorite	353	Baiheshan	10	0.0427	0.0018	0.282845
709	granitic gneiss	361	Hongshishan	10HSS01-9	0.057972	0.00199	0.282546
710	granitic gneiss	366	Hongshishan	10HSS01-10	0.054265	0.001931	0.28261
711	mylonitic granite	371	Mazongshan	10SYQ08-2	0.17093	0.004801	0.282328
712	biotite–plagioclase gneiss	372	Mazongshan	10MZS04-2	0.034963	0.001226	0.282755
713	biotite–plagioclase gneiss	372	Mazongshan	10MZS04-6	0.045042	0.001569	0.28282
714	gneissic granite	373	Wutongjing	BS041-5	0.044162	0.001301	0.282315
715	biotite–plagioclase gneiss	374	Mazongshan	10MZS04-7	0.029861	0.001062	0.282801
716	biotite–plagioclase gneiss	374	Mazongshan	10MZS04-10	0.047133	0.001658	0.282805
717	biotite–plagioclase gneiss	375	Mazongshan	10MZS04-1	0.029567	0.001042	0.282692
718	biotite–plagioclase gneiss	375	Mazongshan	10MZS04-5	0.043481	0.00154	0.282831
719	biotite–plagioclase gneiss	377	Mazongshan	10MZS04-3	0.046472	0.001653	0.282874
720	biotite–plagioclase gneiss	380	Mazongshan	10MZS04-12	0.031265	0.001118	0.282852
721	gneissic granite	389	Wutongjing	BS041-4	0.024569	0.0007	0.282337
722	mylonitic granite	392	Mazongshan	10SYQ08-5	0.028608	0.001074	0.282323
723	syenogranite	395	Shibanjing	PM01TW1-4	0.063353	0.001123	0.282701
724	syenogranite	396	Shibanjing	PM01TW1-3	0.063866	0.001141	0.282653
725	syenogranite	396	Shibanjing	PM01TW1-7	0.037947	0.000688	0.282689
726	syenogranite	396	Shibanjing	PM01TW1-10	0.052137	0.000923	0.28263
727	syenogranite	396	Shibanjing	PM01TW1-18	0.05437	0.000928	0.282638
728	syenogranite	396	Shibanjing	PM01TW1-21	0.048371	0.000825	0.282624
729	gneissic granite	396	Wutongjing	BS041-8	0.03767	0.001111	0.282321
730	K-feldspar granite	397	Huitongshan	B70823-8-1	0.069869	0.002694	0.282641
731	K-feldspar granite	397	Huitongshan	B70823-8-3	0.034999	0.001272	0.282622
732	K-feldspar granite	397	Huitongshan	B70823-8-4	0.029074	0.001046	0.282698
733	K-feldspar granite	397	Huitongshan	B70823-8-5	0.038009	0.001365	0.282664
734	K-feldspar granite	397	Huitongshan	B70823-8-7	0.030087	0.001117	0.282631
735	K-feldspar granite	397	Huitongshan	B70823-8-8	0.066238	0.002095	0.282514
736	K-feldspar granite	397	Huitongshan	B70823-8-9	0.063623	0.002034	0.28258
737	K-feldspar granite	397	Huitongshan	B70823-8-10	0.033024	0.001202	0.282653
738	mylonitic granite	397	Mazongshan	10SYQ05-18	0.04667	0.001484	0.282306
739	syenogranite	397	Shibanjing	PM01TW1-24	0.052416	0.000916	0.28267
740	syenogranite	398	Shibanjing	PM01TW1-1	0.042136	0.000768	0.28269
741	syenogranite	398	Shibanjing	PM01TW1-5	0.054482	0.00096	0.282614
742	syenogranite	398	Shibanjing	PM01TW1-6	0.055091	0.000988	0.282642
743	syenogranite	398	Shibanjing	PM01TW1-15	0.046512	0.000836	0.282728
744	syenogranite	398	Shibanjing	PM01TW1-17	0.076768	0.00131	0.282688
745	syenogranite	398	Shibanjing	PM01TW1-19	0.068111	0.001237	0.282656
746	syenogranite	398	Shibanjing	PM01TW1-20	0.052638	0.000916	0.282623
747	syenogranite	398	Shibanjing	PM01TW1-23	0.074878	0.001254	0.282734
748	syenogranite	399	Shibanjing	PM01TW1-8	0.049999	0.000879	0.282599
749	syenogranite	399	Shibanjing	PM01TW1-9	0.080591	0.001401	0.282756
750	syenogranite	399	Shibanjing	PM01TW1-11	0.049686	0.000858	0.282648
751	syenogranite	399	Shibanjing	PM01TW1-13	0.058571	0.00104	0.282636
752	syenogranite	400	Shibanjing	PM01TW1-16	0.05141	0.000882	0.282658
753	biotite–plagioclase gneiss	401	Mazongshan	10MZS04-4	0.045708	0.001527	0.282732
754	syenogranite	401	Shibanjing	PM01TW1-2	0.024799	0.000504	0.282535
755	syenogranite	401	Shibanjing	PM01TW1-12	0.05945	0.001064	0.282713
756	K-feldspar granite	401.2	Mazongshan	BAI 1-96-1	0.077445	0.001957	0.282659
757	K-feldspar granite	401.2	Mazongshan	BAI 1-96-2	0.102122	0.003377	0.282615
758	K-feldspar granite	401.2	Mazongshan	BAI 1-96-4	0.036451	0.001003	0.282432
759	K-feldspar granite	401.2	Mazongshan	BAI 1-96-5	0.068194	0.001606	0.282633
760	K-feldspar granite	401.2	Mazongshan	BAI 1-96-6	0.054335	0.001483	0.282632
761	K-feldspar granite	401.2	Mazongshan	BAI 1-96-7	0.055989	0.001446	0.282722
762	K-feldspar granite	401.2	Mazongshan	BAI 1-96-9	0.06402	0.001718	0.282658
763	K-feldspar granite	401.2	Mazongshan	BAI 1-96-11	0.07033	0.002191	0.282652
764	K-feldspar granite	401.2	Mazongshan	BAI 1-96-13	0.036827	0.000886	0.282624
765	K-feldspar granite	401.2	Mazongshan	BAI 1-96-14	0.047195	0.001213	0.28269
766	K-feldspar granite	401.2	Mazongshan	BAI 1-96-19	0.061949	0.001459	0.282651
767	K-feldspar granite	401.2	Mazongshan	BAI 1-96-20	0.147572	0.004477	0.28247
768	K-feldspar granite	401.2	Mazongshan	BAI 1-96-21	0.061436	0.001532	0.282737
769	K-feldspar granite	401.2	Mazongshan	BAI 1-96-22	0.099154	0.003126	0.2826
770	K-feldspar granite	401.2	Mazongshan	BAI 1-96-24	0.071745	0.001743	0.282642
771	K-feldspar granite	401.2	Mazongshan	BAI 1-96-26	0.056317	0.00128	0.28268
772	K-feldspar granite	401.2	Mazongshan	BAI 1-96-27	0.089356	0.002146	0.282723
773	K-feldspar granite	401.2	Mazongshan	BAI 1-96-28	0.041956	0.000941	0.282623
774	monzogranite	402	Mazongshan	BS07-136-1	0.031273	0.001235	0.282528
775	monzogranite	402	Mazongshan	BS07-136-2	0.029298	0.001162	0.282535
776	monzogranite	402	Mazongshan	BS07-136-8	0.024299	0.000951	0.282604
777	monzogranite	402	Mazongshan	BS07-136-9	0.019288	0.000749	0.282525
778	monzogranite	402	Mazongshan	BS07-136-10	0.02758	0.001063	0.282604
779	monzogranite	402	Mazongshan	BS07-136-11	0.033553	0.00117	0.282618
780	monzogranite	402	Mazongshan	BS07-136-13	0.022147	0.000852	0.282524
781	monzogranite	402	Mazongshan	BS07-136-14	0.03092	0.001161	0.282553
782	monzogranite	402	Mazongshan	BS07-136-15	0.020628	0.000781	0.282566
783	monzogranite	402	Mazongshan	BS07-136-16	0.032361	0.001194	0.282553
784	monzogranite	402	Mazongshan	BS07-136-17	0.062634	0.00214	0.282516
785	monzogranite	402	Mazongshan	BS07-136-18	0.032106	0.001162	0.282558
786	monzogranite	402	Mazongshan	BS07-136-19	0.022321	0.000847	0.282563
787	syenogranite	402	Shibanjing	PM01TW1-14	0.058571	0.001051	0.282694
788	syenogranite	402	Shibanjing	PM01TW1-22	0.073432	0.001208	0.282662
789	granitic gneiss	403	Hongshishan	10HSS01-11	0.065481	0.002159	0.282673
790	granite	403	Mazongshan	BS07-136-01	0.031273	0.001235	0.282528
791	granite	403	Mazongshan	BS07-136-02	0.029298	0.001162	0.282535
792	granite	403	Mazongshan	BS07-136-03	0.025284	0.001005	0.282561
793	granite	403	Mazongshan	BS07-136-04	0.025835	0.001021	0.282539
794	granite	403	Mazongshan	BS07-136-05	0.019162	0.00078	0.282531
795	granite	403	Mazongshan	BS07-136-06	0.025662	0.001008	0.282583
796	granite	403	Mazongshan	BS07-136-07	0.029658	0.001148	0.282539
797	granite	403	Mazongshan	BS07-136-08	0.024299	0.000951	0.282604
798	granite	403	Mazongshan	BS07-136-09	0.019288	0.000749	0.282525
799	granite	403	Mazongshan	BS07-136-10	0.02758	0.001063	0.282604
800	granite	403	Mazongshan	BS07-136-11	0.033553	0.00117	0.282618
801	granite	403	Mazongshan	BS07-136-12	0.036038	0.001372	0.282576
802	granite	403	Mazongshan	BS07-136-13	0.03092	0.001161	0.282553
803	granite	403	Mazongshan	BS07-136-14	0.020628	0.000781	0.282566
804	granite	403	Mazongshan	BS07-136-15	0.032361	0.001194	0.282553
805	granite	403	Mazongshan	BS07-136-16	0.032106	0.001162	0.282558
806	granite	403	Mazongshan	BS07-136-17	0.022321	0.000847	0.282563
807	granite	403	Mazongshan	BS07-136-18	0.027228	0.00098	0.282582
808	granodiorite	406	Jinwozi	JWZ31-7-08	0.042978	0.001187	0.282466
809	granodiorite	407	Jinwozi	JWZ20-1-13	0.043721	0.001207	0.282466
810	Bt-granodiorite	408	Mazongshan	ZT001-3	0.024013	0.000916	0.282448
811	granodiorite	408	Jinwozi	JWZ31-7-14	0.059922	0.001661	0.282461
812	Bt-granodiorite	409	Mazongshan	ZT001-1	0.031671	0.001173	0.282479
813	Bt-granodiorite	409	Mazongshan	ZT001-4	0.024153	0.000808	0.282478
814	Bt-granodiorite	409	Mazongshan	ZT001-5	0.019627	0.000765	0.2825
815	Bt-granodiorite	409	Mazongshan	ZT001-9	0.018719	0.000733	0.28252
816	Bt-granodiorite	409	Mazongshan	ZT001-10	0.031603	0.001192	0.2825
817	mylonitic granite	410	Mazongshan	10SYQ08-13	0.041339	0.00147	0.282295
818	Bt-granodiorite	410	Mazongshan	ZT001-8	0.019334	0.000723	0.282461
819	Bt-granodiorite	410	Mazongshan	ZT001-13	0.013867	0.000536	0.282439
820	Bt-granodiorite	410	Mazongshan	ZT001-15	0.020279	0.000783	0.282464
821	Bt-granodiorite	411	Mazongshan	ZT001-2	0.04502	0.001647	0.282504
822	Bt-granodiorite	411	Mazongshan	ZT001-7	0.019035	0.000684	0.28251
823	Bt-granodiorite	412	Mazongshan	ZT001-6	0.012171	0.000456	0.282461
824	granodiorite	413	Jinwozi	JWZ31-7-12	0.073739	0.00202	0.282461
825	pyroxene diorite	414	Mingshujing	XJ11-150-02	0.009857	0.000401	0.282569
826	granitic gneiss	414	Hongshishan	10HSS01-12	0.021709	0.000941	0.282446
827	granodiorite	414	Jinwozi	JWZ20-4-08	0.056058	0.001606	0.282482
828	granitic gneiss	415	Hongshishan	10HSS01-4	0.00357	0.000126	0.282467
829	granodiorite	415	Jinwozi	JWZ31-7-15	0.055098	0.00153	0.282469
830	granodiorite	415	Jinwozi	JWZ20-4-01	0.06583	0.001791	0.282536
831	granodiorite	416	Jinwozi	JWZ31-7-11	0.050005	0.001382	0.282451
832	granodiorite	416	Jinwozi	JWZ31-7-13	0.101125	0.002732	0.282442
833	granodiorite	416	Jinwozi	JWZ20-1-11	0.066952	0.001807	0.282472
834	gneissic granite	416	Wutongjing	BS041-11	0.026992	0.000839	0.282329
835	gneissic granite	416	Wutongjing	BS041-12	0.034325	0.001014	0.282329
836	granodiorite	417	Jinwozi	JWZ31-7-02	0.04268	0.0012	0.282433
837	Biotite granite	417	Xiaoxigong	17DJQ10-1-07	0.0109	0.0004	0.282539
838	granodiorite	418	Jinwozi	JWZ31-7-04	0.017567	0.000482	0.281101
839	granodiorite	418	Jinwozi	JWZ20-4-06	0.040993	0.001148	0.282471
840	granodiorite	418	Jinwozi	JWZ20-4-13	0.050637	0.001381	0.282461
841	gneissic granite	418	Wutongjing	BS041-10	0.023961	0.000759	0.282293
842	Biotite granite	418	Xiaoxigong	17DJQ10-1-05	0.0095	0.0004	0.282534
843	Augen gneiss	418	Xiaoxigong	17DJQ8-10-1-16	0.0225	0.001077	0.282559
844	pyroxene diorite	419	Mingshujing	XJ11-150-20	0.016219	0.000728	0.282506
845	granodiorite	419	Jinwozi	JWZ31-7-09	0.049239	0.001344	0.282484
846	Biotite granite	419	Xiaoxigong	17DJQ10-1-22	0.0047	0.0002	0.282476
847	granite	420	Huitongshan	LYB19 04	0.018572	0.000902	0.282588
848	granite	420	Huitongshan	LYB19 17	0.015597	0.000749	0.282535
849	biotite–plagioclase gneiss	420	Mazongshan	10MZS04-13	0.04485	0.001509	0.282721
850	granodiorite	420	Jinwozi	JWZ20-1-02	0.046484	0.001245	0.282477
851	Biotite granite	420	Xiaoxigong	17DJQ10-1-12	0.0116	0.0005	0.282517
852	Biotite granite	420	Xiaoxigong	17DJQ10-1-21	0.0183	0.0007	0.282458
853	Biotite granite	420	Xiaoxigong	17DJQ10-1-26	0.0125	0.0005	0.282508
854	Biotite granite	420	Xiaoxigong	17DJQ10-1-28	0.0099	0.0004	0.28249
855	Biotite granite	420	Xiaoxigong	17DJQ10-1-29	0.0162	0.0006	0.282525
856	Biotite granite	420	Xiaoxigong	17DJQ10-1-31	0.0121	0.0005	0.282514
857	Biotite granite	420	Xiaoxigong	17DJQ10-1-32	0.0092	0.0004	0.282534
858	Biotite granite	420	Xiaoxigong	17DJQ10-1-33	0.0113	0.0004	0.28248
859	Biotite granite	420	Xiaoxigong	17DJQ10-1-34	0.0134	0.0005	0.282514
860	granite	421	Huitongshan	LYB19 06	0.014552	0.000718	0.282553
861	granite	421	Huitongshan	LYB19 08	0.015018	0.000733	0.282555
862	granodiorite	421	Jinwozi	JWZ20-1-15	0.023481	0.000651	0.282484
863	granodiorite	421	Jinwozi	JWZ20-4-05	0.047861	0.001341	0.282484
864	Biotite granite	421	Xiaoxigong	17DJQ10-1-06	0.0161	0.0006	0.282442
865	Biotite granite	421	Xiaoxigong	17DJQ10-1-13	0.0142	0.0006	0.282492
866	Biotite granite	421	Xiaoxigong	17DJQ10-1-23	0.0075	0.0003	0.282511
867	Biotite granite	421	Xiaoxigong	17DJQ10-1-30	0.0059	0.0002	0.282437
868	Augen gneiss	421	Xiaoxigong	17DJQ8-10-1-19	0.0147	0.000653	0.282454
869	quartz monzonite	421.4	Mazongshan	BAI 1-91-1	0.026536	0.000639	0.282425
870	quartz monzonite	421.4	Mazongshan	BAI 1-91-2	0.027499	0.000665	0.282299
871	quartz monzonite	421.4	Mazongshan	BAI 1-91-3	0.015336	0.000434	0.282361
872	quartz monzonite	421.4	Mazongshan	BAI 1-91-4	0.055518	0.001307	0.282426
873	quartz monzonite	421.4	Mazongshan	BAI 1-91-6	0.037736	0.000905	0.282459
874	quartz monzonite	421.4	Mazongshan	BAI 1-91-7	0.020999	0.000592	0.282426
875	quartz monzonite	421.4	Mazongshan	BAI 1-91-8	0.031038	0.000741	0.282447
876	quartz monzonite	421.4	Mazongshan	BAI 1-91-9	0.047927	0.001179	0.282502
877	quartz monzonite	421.4	Mazongshan	BAI 1-91-10	0.030038	0.00072	0.282492
878	quartz monzonite	421.4	Mazongshan	BAI 1-91-11	0.065902	0.001519	0.282474
879	quartz monzonite	421.4	Mazongshan	BAI 1-91-12	0.033792	0.000863	0.28226
880	quartz monzonite	421.4	Mazongshan	BAI 1-91-13	0.032451	0.000786	0.282483
881	quartz monzonite	421.4	Mazongshan	BAI 1-91-14	0.046347	0.001094	0.282478
882	quartz monzonite	421.4	Mazongshan	BAI 1-91-15	0.016751	0.000414	0.282374
883	quartz monzonite	421.4	Mazongshan	BAI 1-91-16	0.023058	0.000564	0.282374
884	quartz monzonite	421.4	Mazongshan	BAI 1-91-18	0.043079	0.001015	0.282454
885	quartz monzonite	421.4	Mazongshan	BAI 1-91-19	0.018254	0.000459	0.282325
886	quartz monzonite	421.4	Mazongshan	BAI 1-91-21	0.044579	0.001003	0.28249
887	granodiorite	422	Jinwozi	JWZ20-4-09	0.057293	0.001583	0.28245
888	granodiorite	422	Jinwozi	JWZ20-4-14	0.042615	0.001196	0.282502
889	gneissic granite	422	Wutongjing	BS041-6	0.027527	0.000818	0.282305
890	Biotite granite	422	Xiaoxigong	17DJQ10-1-18	0.0184	0.0007	0.282501
891	Biotite granite	422	Xiaoxigong	17DJQ10-1-20	0.0074	0.0003	0.282511
892	Augen gneiss	422	Xiaoxigong	17DJQ8-10-1-25	0.0139	0.000697	0.282689
893	Augen gneiss	422	Xiaoxigong	17DJQ8-10-1-23	0.0157	0.000759	0.28275
894	granite	423	Huitongshan	LYB19 09	0.02035	0.000976	0.282497
895	granite	423	Huitongshan	LYB19 16	0.013729	0.000644	0.282572
896	pyroxene diorite	423	Mingshujing	XJ11-150-05	0.024405	0.001076	0.282584
897	mylonitic granite	423	Mazongshan	10SYQ05-16	0.043201	0.001571	0.282475
898	mylonitic granite	423	Mazongshan	10SYQ08-4	0.138246	0.004053	0.282417
899	Mylonitizcd diorite	423	Xiaoxigong	15BS47-1.4	0.0148	0.0006	0.282495
900	Augen gneiss	423	Xiaoxigong	17DJQ8-10-1-24	0.014	0.000703	0.282688
901	Mylonitizcd diorite	423	Xiaoxigong	15BS51-1.5	0.0155	0.0005	0.282613
902	granite	424	Huitongshan	LYB19 02	0.011591	0.000544	0.282558
903	granite	424	Huitongshan	LYB19 12	0.01613	0.000759	0.282588
904	granite	424	Huitongshan	LYB19 13	0.01485	0.000712	0.282584
905	granite	424	Huitongshan	LYB19 14	0.013388	0.000641	0.282586
906	granite	424	Huitongshan	LYB19 15	0.012693	0.000599	0.282573
907	mylonitic monzogranite	424	Yuejinshan	Z005-10	0.060436	0.002252	0.282602
908	mylonitic monzogranite	424	Yuejinshan	Z005-12	0.034637	0.00123	0.282548
909	granodiorite	424	Jinwozi	JWZ20-4-12	0.088644	0.002516	0.282458
910	Augen gneiss	424	Xiaoxigong	17DJQ8-10-1-21	0.0191	0.000898	0.282737
911	granite	425	Huitongshan	LYB19 01	0.010055	0.000476	0.282589
912	granite	425	Huitongshan	LYB19 03	0.012214	0.000587	0.282557
913	granite	425	Huitongshan	LYB19 10	0.013565	0.000664	0.282557
914	granite	425	Huitongshan	LYB19 11	0.011004	0.00052	0.282572
915	granite	425	Huitongshan	LYB19 18	0.012992	0.000612	0.282549
916	monzogranite	425	Mazongshan	BS07-136-3	0.025284	0.001005	0.282561
917	monzogranite	425	Mazongshan	BS07-136-4	0.025835	0.001021	0.282539
918	monzogranite	425	Mazongshan	BS07-136-5	0.019162	0.00078	0.282531
919	monzogranite	425	Mazongshan	BS07-136-6	0.025662	0.001008	0.282583
920	monzogranite	425	Mazongshan	BS07-136-7	0.029658	0.001148	0.282539
921	monzogranite	425	Mazongshan	BS07-136-12	0.036038	0.001372	0.282576
922	monzogranite	425	Mazongshan	BS07-136-20	0.027228	0.00098	0.282582
923	monzogranite	425	Mazongshan	BS07-136-21	0.022729	0.000882	0.28243
924	gneissic granite	425	Wutongjing	BS041-1	0.027812	0.000726	0.282314
925	gneissic granite	425	Wutongjing	BS041-7	0.01244	0.000427	0.282289
926	Augen gneiss	425	Xiaoxigong	17DJQ8-10-1-15	0.0159	0.000762	0.282453
927	Augen gneiss	425	Xiaoxigong	17DJQ8-10-1-20	0.0112	0.000554	0.282574
928	Augen gneiss	425	Xiaoxigong	17DJQ8-10-3-09	0.0107	0.000512	0.282463
929	granite	426	Huitongshan	LYB19 07	0.017086	0.000806	0.282575
930	mylonitic monzogranite	426	Yuejinshan	Z005-3	0.080728	0.00279	0.282475
931	granodiorite	426	Jinwozi	JWZ20-1-01	0.059925	0.001613	0.282443
932	granodiorite	426	Jinwozi	JWZ20-1-12	0.046312	0.001233	0.282466
933	Augen gneiss	426	Xiaoxigong	17DJQ8-10-1-18	0.0179	0.000832	0.282499
934	Augen gneiss	426	Xiaoxigong	17DJQ8-10-1-22	0.0199	0.000982	0.282685
935	Augen gneiss	426	Xiaoxigong	17DJQ14-1-2-03	0.0222	0.001057	0.282726
936	Augen gneiss	426	Xiaoxigong	17DJQ14-1-2-12	0.0142	0.000695	0.282699
937	granite	427	Huitongshan	LYB19 05	0.014584	0.000705	0.282568
938	granite	427	Huitongshan	LYB19 19	0.017939	0.000815	0.282558
939	biotite–plagioclase gneiss	427	Mazongshan	10MZS04-9	0.036063	0.00131	0.282745
940	mylonitic monzogranite	427	Yuejinshan	Z005-1	0.052072	0.001836	0.282465
941	mylonitic monzogranite	427	Yuejinshan	Z005-5	0.039163	0.001379	0.282493
942	mylonitic monzogranite	427	Yuejinshan	Z005-6	0.024779	0.000907	0.282593
943	mylonitic monzogranite	427	Yuejinshan	Z005-8	0.031145	0.001115	0.282503
944	mylonitic monzogranite	427	Yuejinshan	Z005-11	0.046007	0.001661	0.282538
945	mylonitic monzogranite	427	Yuejinshan	Z005-14	0.032217	0.001165	0.282482
946	granodiorite	427	Jinwozi	JWZ20-4-04	0.042505	0.001176	0.282482
947	Augen gneiss	427	Xiaoxigong	17DJQ8-10-1-01	0.0197	0.000876	0.282399
948	Augen gneiss	427	Xiaoxigong	17DJQ8-10-1-09	0.0144	0.000692	0.282484
949	Augen gneiss	427	Xiaoxigong	17DJQ8-10-3-08	0.0284	0.001261	0.282457
950	Augen gneiss	427	Xiaoxigong	17DJQ8-10-3-12	0.0126	0.000593	0.28249
951	Mylonitizcd diorite	427	Xiaoxigong	15BS51-1.15	0.0175	0.0006	0.282639
952	Mylonitizcd diorite	427	Xiaoxigong	15BS51-1.22	0.0199	0.0007	0.282543
953	granite	428	Huitongshan	LYB19 20	0.013806	0.00065	0.282579
954	pyroxene diorite	428	Mingshujing	XJ11-150-11	0.008994	0.000404	0.282541
955	quartz monzonite	428	Shibanjing	X10-77-2-01	0.0248107	0.000984261	0.282328
956	quartz monzonite	428	Shibanjing	X10-77-2-03	0.0146364	0.000661292	0.282281
957	quartz monzonite	428	Shibanjing	X10-77-2-04	0.0139011	0.000511804	0.282335
958	quartz monzonite	428	Shibanjing	X10-77-2-06	0.0238849	0.000887556	0.282325
959	quartz monzonite	428	Shibanjing	X10-77-2-08	0.0231625	0.000855311	0.282295
960	quartz monzonite	428	Shibanjing	X10-77-2-09	0.0189113	0.000705497	0.282316
961	quartz monzonite	428	Shibanjing	X10-77-2-11	0.0106885	0.00041763	0.282328
962	quartz monzonite	428	Shibanjing	X10-77-2-12	0.0281706	0.00104167	0.282303
963	quartz monzonite	428	Shibanjing	X10-77-2-13	0.0319055	0.00119251	0.282366
964	quartz monzonite	428	Shibanjing	X10-77-2-14	0.0275981	0.00104338	0.282321
965	quartz monzonite	428	Shibanjing	X10-77-2-15	0.0302651	0.00116082	0.282386
966	quartz monzonite	428	Shibanjing	X10-77-2-17	0.016275	0.00063636	0.282359
967	quartz monzonite	428	Shibanjing	X10-77-2-18	0.0156586	0.000605283	0.282324
968	quartz monzonite	428	Shibanjing	X10-77-2-19	0.0186038	0.000718697	0.282291
969	quartz monzonite	428	Shibanjing	X10-77-2-21	0.0243091	0.000901784	0.282098
970	quartz monzonite	428	Shibanjing	X10-77-2-22	0.021694	0.000814856	0.282315
971	quartz monzonite	428	Shibanjing	X10-77-2-24	0.00853849	0.000427821	0.282285
972	quartz monzonite	428	Shibanjing	X10-77-2-25	0.0368592	0.00138592	0.282325
973	mylonitic monzogranite	428	Yuejinshan	Z005-4	0.027543	0.000996	0.282522
974	mylonitic monzogranite	428	Yuejinshan	Z005-7	0.057531	0.001998	0.282597
975	mylonitic monzogranite	428	Yuejinshan	Z005-9	0.065601	0.002305	0.282472
976	granodiorite	428	Jinwozi	JWZ20-1-09	0.078201	0.002086	0.282447
977	gneissic granite	428	Wutongjing	BS041-3	0.02828	0.000759	0.282363
978	Mylonitizcd diorite	428	Xiaoxigong	15BS47-1.1	0.0128	0.0005	0.282523
979	Mylonitizcd diorite	428	Xiaoxigong	15BS47-1.3	0.0196	0.0008	0.282415
980	Mylonitizcd diorite	428	Xiaoxigong	17DJQ11-1-01	0.0132	0.0006	0.282464
981	Augen gneiss	428	Xiaoxigong	17DJQ8-10-3-13	0.0072	0.000368	0.282583
982	Mylonitizcd diorite	428	Xiaoxigong	15BS51-1.13	0.0148	0.0006	0.282651
983	mylonitic monzogranite	429	Yuejinshan	Z005-2	0.036825	0. 001288	0.282554
984	granodiorite	429	Jinwozi	JWZ31-7-06	0.079771	0.002234	0.282463
985	granodiorite	429	Jinwozi	JWZ20-4-07	0.053039	0.001431	0.28249
986	gneissic granite	429	Wutongjing	BS041-2	0.016937	0.000459	0.282332
987	granite	430	Mingshujing	XJ11-143-02	0.021816	0.000876	0.282653
988	diorite	430	Mingshujing	XJ11-140-02	0.018303	0.000809	0.282719
989	pyroxene diorite	430	Mingshujing	XJ11-150-06	0.043773	0.001599	0.282388
990	mylonitic granite	430	Mazongshan	10SYQ08-7	0.11662	0.003431	0.28232
991	mylonitized granite	430	Hongliuxia	X10-52-1-03	0.036809	0.00122479	0.2825
992	mylonitized granite	430	Hongliuxia	X10-52-1-05	0.0527902	0.00162516	0.282526
993	mylonitized granite	430	Hongliuxia	X10-52-1-07	0.0491086	0.00175204	0.282474
994	mylonitized granite	430	Hongliuxia	X10-52-1-08	0.0222057	0.000711204	0.2825
995	mylonitized granite	430	Hongliuxia	X10-52-1-10	0.0748748	0.0022418	0.282739
996	mylonitized granite	430	Hongliuxia	X10-52-1-11	0.0942396	0.00298071	0.282638
997	mylonitized granite	430	Hongliuxia	X10-52-1-14	0.0499718	0.00165906	0.282654
998	mylonitized granite	430	Hongliuxia	X10-52-1-15	0.046977	0.0015779	0.282759
999	mylonitized granite	430	Hongliuxia	X10-52-1-16	0.107226	0.00324904	0.282659
1000	mylonitized granite	430	Hongliuxia	X10-52-1-17	0.056573	0.00201635	0.282503
1001	mylonitized granite	430	Hongliuxia	X10-52-1-18	0.071101	0.00244201	0.282697
1002	mylonitized granite	430	Hongliuxia	X10-52-1-19	0.0400907	0.00150386	0.282632
1003	mylonitized granite	430	Hongliuxia	X10-52-1-20	0.0485314	0.00157272	0.28262
1004	mylonitized granite	430	Hongliuxia	X10-52-1-21	0.0182172	0.000672222	0.282533
1005	mylonitized granite	430	Hongliuxia	X10-52-1-23	0.0527087	0.00189053	0.282544
1006	mylonitized granite	430	Hongliuxia	X10-52-1-24	0.0423461	0.00129217	0.282569
1007	mylonitized granite	430	Hongliuxia	X10-52-1-27	0.0552801	0.00179146	0.282624
1008	mylonitized granite	430	Hongliuxia	X10-52-1-25	0.14984	0.0040072	0.282899
1009	granodiorite	430	Jinwozi	JWZ31-7-07	0.068151	0.001901	0.282452
1010	granodiorite	430	Jinwozi	JWZ20-1-07	0.080013	0.002174	0.282441
1011	granodiorite	430	Jinwozi	JWZ20-4-03	0.061611	0.001708	0.282493
1012	Mylonitizcd diorite	430	Xiaoxigong	15BS47-1.2	0.011	0.0004	0.282566
1013	Mylonitizcd diorite	430	Xiaoxigong	17DJQ11-1-02	0.014	0.0006	0.282504
1014	Augen gneiss	430	Xiaoxigong	17DJQ8-10-2-02	0.0144	0.000679	0.282562
1015	Augen gneiss	430	Xiaoxigong	17DJQ8-10-2-11	0.0098	0.000491	0.282575
1016	Augen gneiss	430	Xiaoxigong	17DJQ8-10-3-07	0.0138	0.000662	0.28254
1017	Augen gneiss	430	Xiaoxigong	17DJQ8-10-3-23	0.0125	0.000612	0.282564
1018	Augen gneiss	430	Xiaoxigong	17DJQ14-1-1-09	0.0105	0.00052	0.282663
1019	granite	430.37	Qiaowan	16BS092-11	0.00862731	0.000184739	0.282307
1020	granite	430.652	Qiaowan	16BS092-08	0.0385612	0.00132841	0.282294
1021	Augen gneiss	431	Xiaoxigong	17DJQ8-10-2-05	0.0142	0.000657	0.282554
1022	Augen gneiss	431	Xiaoxigong	17DJQ14-1-1-01	0.0137	0.000668	0.282705
1023	Augen gneiss	431	Xiaoxigong	17DJQ14-1-2-07	0.0119	0.000589	0.282698
1024	Mylonitizcd diorite	431	Xiaoxigong	15BS51-1.8	0.0164	0.0006	0.282602
1025	granite	432	Mingshujing	XJ11-143-16	0.025371	0.001012	0.282678
1026	diorite	432	Mingshujing	XJ11-140-18	0.048907	0.002073	0.282801
1027	gneissic granite	432	Wutongjing	BS041-9	0.017983	0.000558	0.282316
1028	Mylonitizcd diorite	432	Xiaoxigong	17DJQ11-1-04	0.0122	0.0005	0.282512
1029	Augen gneiss	432	Xiaoxigong	17DJQ8-10-1-12	0.0154	0.000744	0.282528
1030	Augen gneiss	432	Xiaoxigong	17DJQ8-10-2-01	0.0139	0.000675	0.282606
1031	Augen gneiss	432	Xiaoxigong	17DJQ8-10-2-04	0.0053	0.000279	0.282564
1032	Augen gneiss	432	Xiaoxigong	17DJQ8-10-3-15	0.0126	0.000614	0.282479
1033	Augen gneiss	432	Xiaoxigong	17DJQ14-1-2-06	0.0097	0.000483	0.282681
1034	Mylonitizcd diorite	432	Xiaoxigong	15BS51-1.1	0.0214	0.0008	0.282615
1035	Mylonitizcd diorite	432	Xiaoxigong	15BS51-1.4	0.0144	0.0006	0.282591
1036	Mylonitizcd diorite	432	Xiaoxigong	15BS51-1.10	0.0185	0.0007	0.282577
1037	granite	433	Mingshujing	XJ11-143-11	0.019553	0.000765	0.282684
1038	diorite	433	Mingshujing	XJ11-140-03	0.01048	0.00047	0.282638
1039	pyroxene diorite	433	Mingshujing	XJ11-150-21	0.044472	0.001675	0.28218
1040	mylonitic granite	433	Mazongshan	10SYQ08-1	0.037415	0.001362	0.282292
1041	mylonitized granite	433	Hongliuxia	X10-51-1-01	0.0156402	0.000590524	0.282465
1042	mylonitized granite	433	Hongliuxia	X10-51-1-03	0.0264669	0.000989701	0.282574
1043	mylonitized granite	433	Hongliuxia	X10-51-1-04	0.0430161	0.00160683	0.282613
1044	mylonitized granite	433	Hongliuxia	X10-51-1-05	0.0301679	0.00110769	0.282616
1045	mylonitized granite	433	Hongliuxia	X10-51-1-06	0.100401	0.00314631	0.282678
1046	mylonitized granite	433	Hongliuxia	X10-51-1-07	0.0497101	0.0018418	0.282585
1047	mylonitized granite	433	Hongliuxia	X10-51-1-08	0.0419134	0.00156308	0.28258
1048	mylonitized granite	433	Hongliuxia	X10-51-1-10	0.0296024	0.00113017	0.282583
1049	mylonitized granite	433	Hongliuxia	X10-51-1-11	0.041008	0.00156017	0.282621
1050	mylonitized granite	433	Hongliuxia	X10-51-1-13	0.0389559	0.001423	0.282587
1051	mylonitized granite	433	Hongliuxia	X10-51-1-15	0.0340133	0.00127355	0.282632
1052	mylonitized granite	433	Hongliuxia	X10-51-1-16	0.0334014	0.00124895	0.282625
1053	mylonitized granite	433	Hongliuxia	X10-51-1-18	0.0347591	0.00126834	0.282568
1054	mylonitized granite	433	Hongliuxia	X10-51-1-19	0.0327528	0.00128082	0.282585
1055	mylonitized granite	433	Hongliuxia	X10-51-1-21	0.0231587	0.000868186	0.282519
1056	mylonitized granite	433	Hongliuxia	X10-51-1-22	0.0459877	0.00177843	0.28259
1057	granite	433	Shibanjing	X10-72-1-03	0.0220106	0.000847087	0.282344
1058	granite	433	Shibanjing	X10-72-1-05	0.0231969	0.000879436	0.282298
1059	granite	433	Shibanjing	X10-72-1-06	0.0199365	0.0007621	0.282337
1060	granite	433	Shibanjing	X10-72-1-07	0.039692	0.00146599	0.282307
1061	granite	433	Shibanjing	X10-72-1-08	0.0307891	0.00115574	0.28232
1062	granite	433	Shibanjing	X10-72-1-10	0.0204396	0.000771593	0.282338
1063	granite	433	Shibanjing	X10-72-1-12	0.0268078	0.000993779	0.282312
1064	granite	433	Shibanjing	X10-72-1-13	0.016902	0.000643154	0.282291
1065	granite	433	Shibanjing	X10-72-1-14	0.0229444	0.000894895	0.282316
1066	granite	433	Shibanjing	X10-72-1-15	0.0287655	0.00102851	0.282299
1067	granite	433	Shibanjing	X10-72-1-16	0.0250202	0.000943053	0.282299
1068	granodiorite	433	Jinwozi	JWZ31-7-03	0.052978	0.001478	0.282444
1069	granodiorite	433	Jinwozi	JWZ20-1-03	0.039699	0.00111	0.28246
1070	granodiorite	433	Jinwozi	JWZ20-1-10	0.044292	0.001236	0.282469
1071	mylonitic granite	433	Qiaowan	X10-98-2-01	0.017517	0.000732	0.282114
1072	mylonitic granite	433	Qiaowan	X10-98-2-02	0.025012	0.000966	0.282118
1073	mylonitic granite	433	Qiaowan	X10-98-2-03	0.024924	0.000943	0.282155
1074	mylonitic granite	433	Qiaowan	X10-98-2-04	0.02477	0.000946	0.282176
1075	mylonitic granite	433	Qiaowan	X10-98-2-05	0.03	0.001144	0.282155
1076	mylonitic granite	433	Qiaowan	X10-98-2-06	0.023765	0.000925	0.282174
1077	mylonitic granite	433	Qiaowan	X10-98-2-07	0.020695	0.000774	0.282125
1078	mylonitic granite	433	Qiaowan	X10-98-2-08	0.013991	0.000539	0.282185
1079	mylonitic granite	433	Qiaowan	X10-98-2-09	0.019419	0.000742	0.282135
1080	mylonitic granite	433	Qiaowan	X10-98-2-10	0.023142	0.000879	0.282089
1081	mylonitic granite	433	Qiaowan	X10-98-2-11	0.029042	0.001102	0.282177
1082	mylonitic granite	433	Qiaowan	X10-98-2-12	0.023332	0.000895	0.282179
1083	mylonitic granite	433	Qiaowan	X10-98-2-13	0.029235	0.001084	0.282087
1084	Mylonitizcd diorite	433	Xiaoxigong	17DJQ11-1-05	0.0195	0.0009	0.282558
1085	Mylonitizcd diorite	433	Xiaoxigong	17DJQ11-1-06	0.015	0.0007	0.282485
1086	Mylonitizcd diorite	433	Xiaoxigong	17DJQ11-1-07	0.0158	0.0007	0.282462
1087	Mylonitizcd diorite	433	Xiaoxigong	17DJQ11-1-09	0.0183	0.0008	0.282532
1088	Mylonitizcd diorite	433	Xiaoxigong	17DJQ11-1-10	0.0213	0.0009	0.28246
1089	Mylonitizcd diorite	433	Xiaoxigong	17DJQ11-1-12	0.0102	0.0005	0.282559
1090	Mylonitizcd diorite	433	Xiaoxigong	17DJQ11-1-13	0.01	0.0005	0.282502
1091	Augen gneiss	433	Xiaoxigong	17DJQ8-10-1-03	0.0074	0.000356	0.282569
1092	Augen gneiss	433	Xiaoxigong	17DJQ8-10-1-14	0.0303	0.001666	0.282795
1093	Augen gneiss	433	Xiaoxigong	17DJQ8-10-3-02	0.0098	0.000478	0.282488
1094	Augen gneiss	433	Xiaoxigong	17DJQ8-10-3-04	0.0176	0.000837	0.282533
1095	Augen gneiss	433	Xiaoxigong	17DJQ14-1-1-05	0.0159	0.000803	0.282688
1096	Augen gneiss	433	Xiaoxigong	17DJQ14-1-1-07	0.025	0.001201	0.282716
1097	Augen gneiss	433	Xiaoxigong	17DJQ14-1-2-11	0.0212	0.001021	0.282677
1098	Mylonitizcd diorite	433	Xiaoxigong	15BS51-1.23	0.0156	0.0006	0.282638
1099	granite	434	Mingshujing	XJ11-143-22	0.018359	0.000753	0.282666
1100	granite	434	Mingshujing	XJ11-143-23	0.025226	0.00105	0.282692
1101	granodiorite	434	Jinwozi	JWZ20-1-14	0.103349	0.002955	0.282448
1102	granodiorite	434	Jinwozi	JWZ20-4-10	0.038416	0.001306	0.282595
1103	Mylonitizcd diorite	434	Xiaoxigong	15BS47-1.6	0.0133	0.0005	0.282526
1104	Mylonitizcd diorite	434	Xiaoxigong	15BS50-2.13	0.0131	0.0005	0.282476
1105	Mylonitizcd diorite	434	Xiaoxigong	17DJQ11-1-14	0.0107	0.0005	0.282518
1106	Mylonitizcd diorite	434	Xiaoxigong	17DJQ11-1-15	0.0139	0.0006	0.282535
1107	Mylonitizcd diorite	434	Xiaoxigong	17DJQ11-1-16	0.0086	0.0004	0.282534
1108	Mylonitizcd diorite	434	Xiaoxigong	17DJQ11-1-18	0.0159	0.0007	0.282565
1109	Mylonitizcd diorite	434	Xiaoxigong	17DJQ11-1-22	0.0094	0.0004	0.282514
1110	Augen gneiss	434	Xiaoxigong	17DJQ8-10-1-05	0.0125	0.000605	0.282452
1111	Augen gneiss	434	Xiaoxigong	17DJQ8-10-2-06	0.0116	0.000559	0.282437
1112	Augen gneiss	434	Xiaoxigong	17DJQ14-1-2-01	0.0154	0.000747	0.282654
1113	Augen gneiss	434	Xiaoxigong	17DJQ14-1-2-05	0.0169	0.000872	0.282722
1114	Augen gneiss	434	Xiaoxigong	17DJQ14-1-2-15	0.0109	0.000538	0.28273
1115	Mylonitizcd diorite	434	Xiaoxigong	15BS51-1.20	0.0115	0.0004	0.282546
1116	granodiorite	434.4	Mazongshan	BAI 1-118-1	0.016534	0.00046	0.28266
1117	granodiorite	434.4	Mazongshan	BAI 1-118-2	0.019969	0.000534	0.28268
1118	granodiorite	434.4	Mazongshan	BAI 1-118-3	0.027842	0.000714	0.282734
1119	granodiorite	434.4	Mazongshan	BAI 1-118-4	0.021818	0.000576	0.282685
1120	granodiorite	434.4	Mazongshan	BAI 1-118-5	0.030402	0.000757	0.282721
1121	granodiorite	434.4	Mazongshan	BAI 1-118-6	0.022694	0.000571	0.282734
1122	granodiorite	434.4	Mazongshan	BAI 1-118-7	0.025629	0.000636	0.282695
1123	granodiorite	434.4	Mazongshan	BAI 1-118-8	0.026015	0.000657	0.282725
1124	granodiorite	434.4	Mazongshan	BAI 1-118-9	0.027662	0.000686	0.282775
1125	granodiorite	434.4	Mazongshan	BAI 1-118-10	0.030331	0.000759	0.28271
1126	granodiorite	434.4	Mazongshan	BAI 1-118-11	0.028898	0.000727	0.282705
1127	granodiorite	434.4	Mazongshan	BAI 1-130-1	0.030091	0.000798	0.282698
1128	granodiorite	434.4	Mazongshan	BAI 1-130-2	0.041012	0.001054	0.282705
1129	granodiorite	434.4	Mazongshan	BAI 1-130-3	0.022494	0.000545	0.282528
1130	granodiorite	434.4	Mazongshan	BAI 1-130-5	0.066015	0.001469	0.282774
1131	granodiorite	434.4	Mazongshan	BAI 1-130-6	0.03937	0.000806	0.28282
1132	granodiorite	434.4	Mazongshan	BAI 1-130-8	0.034821	0.000676	0.28274
1133	granodiorite	434.4	Mazongshan	BAI 1-130-9	0.058334	0.001187	0.282795
1134	granodiorite	434.4	Mazongshan	BAI 1-130-10	0.02558	0.000543	0.282808
1135	granodiorite	434.4	Mazongshan	BAI 1-130-11	0.020149	0.000439	0.282786
1136	granodiorite	434.4	Mazongshan	BAI 1-130-13	0.011708	0.000307	0.282744
1137	granite	435	Mingshujing	XJ11-143-01	0.028701	0.001157	0.282482
1138	granite	435	Mingshujing	XJ11-143-25	0.036488	0.001423	0.282744
1139	diorite	435	Mingshujing	XJ11-140-16	0.007159	0.000352	0.282633
1140	mylonitic granite	435	Mazongshan	10SYQ05-17	0.043394	0.001526	0.28252
1141	granodiorite	435	Jinwozi	JWZ20-4-11	0.072619	0.001997	0.282495
1142	Mylonitizcd diorite	435	Xiaoxigong	15BS47-1.7	0.0182	0.0007	0.282564
1143	Mylonitizcd diorite	435	Xiaoxigong	15BS50-2.5	0.0137	0.0006	0.282403
1144	Mylonitizcd diorite	435	Xiaoxigong	17DJQ11-1-23	0.0087	0.0004	0.282518
1145	Mylonitizcd diorite	435	Xiaoxigong	17DJQ11-1-26	0.0116	0.0005	0.282504
1146	Augen gneiss	435	Xiaoxigong	17DJQ8-10-1-08	0.0095	0.000429	0.282604
1147	Augen gneiss	435	Xiaoxigong	17DJQ8-10-2-17	0.0123	0.000601	0.28258
1148	Augen gneiss	435	Xiaoxigong	17DJQ8-10-3-03	0.0183	0.000899	0.28251
1149	Augen gneiss	435	Xiaoxigong	17DJQ14-1-1-06	0.0221	0.001055	0.282596
1150	Augen gneiss	435	Xiaoxigong	17DJQ14-1-1-15	0.0208	0.000972	0.282662
1151	Augen gneiss	435	Xiaoxigong	17DJQ14-1-1-16	0.0096	0.000483	0.282688
1152	Augen gneiss	435	Xiaoxigong	17DJQ14-1-2-18	0.0221	0.001101	0.282701
1153	Mylonitizcd diorite	435	Xiaoxigong	15BS51-1.7	0.0297	0.0011	0.282597
1154	Mylonitizcd diorite	435	Xiaoxigong	15BS51-1.14	0.0155	0.0006	0.282549
1155	quartz diorite	435.4	Mazongshan	BA11-87-1	0.036957	0.00088	0.282423
1156	quartz diorite	435.4	Mazongshan	BAI 1-87-4	0.047922	0.001458	0.282488
1157	quartz diorite	435.4	Mazongshan	BAI 1-87-6	0.033823	0.000968	0.282494
1158	quartz diorite	435.4	Mazongshan	BAI 1-87-7	0.035538	0.000914	0.282426
1159	quartz diorite	435.4	Mazongshan	BAI 1-87-8	0.041655	0.001114	0.282488
1160	quartz diorite	435.4	Mazongshan	BAI 1-87-9	0.048976	0.001418	0.282405
1161	quartz diorite	435.4	Mazongshan	BAI 1-87-11	0.033905	0.000862	0.282559
1162	quartz diorite	435.4	Mazongshan	BAI 1-87-13	0.044281	0.001021	0.282458
1163	quartz diorite	435.4	Mazongshan	BAI 1-87-14	0.033929	0.00082	0.282472
1164	quartz diorite	435.4	Mazongshan	BAI 1-87-15	0.083123	0.001964	0.282472
1165	quartz diorite	435.4	Mazongshan	BAI 1-87-16	0.061472	0.001294	0.282488
1166	quartz diorite	435.4	Mazongshan	BAI 1-87-22	0.029573	0.000847	0.282297
1167	quartz diorite	435.4	Mazongshan	BAI 1-87-23	0.039487	0.000915	0.282496
1168	quartz diorite	435.4	Mazongshan	BAI 1-87-24	0.056334	0.001514	0.282457
1169	quartz diorite	435.4	Mazongshan	BAI 1-87-25	0.039908	0.001117	0.282269
1170	quartz diorite	435.4	Mazongshan	BAI 1-87-26	0.052864	0.001216	0.282488
1171	quartz diorite	435.4	Mazongshan	BAI 1-87-27	0.041112	0.001252	0.282459
1172	granite	436	Mingshujing	XJ11-143-04	0.00831	0.000393	0.282636
1173	granite	436	Mingshujing	XJ11-143-10	0.016435	0.000665	0.282695
1174	granite	436	Mingshujing	XJ11-143-12	0.019812	0.000771	0.282665
1175	granite	436	Mingshujing	XJ11-143-13	0.029602	0.001125	0.282735
1176	granite	436	Mingshujing	XJ11-143-15	0.023941	0.000935	0.282701
1177	granite	436	Mingshujing	XJ11-143-20	0.016909	0.000682	0.282682
1178	granite	436	Mingshujing	XJ11-143-21	0.022315	0.000863	0.282476
1179	mylonitic granite	436	Mazongshan	10SYQ05-10	0.039531	0.001357	0.282398
1180	mylonitic granite	436	Mazongshan	10SYQ08-11	0.049241	0.00174	0.282339
1181	granodiorite	436	Jinwozi	JWZ20-1-08	0.044636	0.001186	0.282456
1182	Mylonitizcd diorite	436	Xiaoxigong	15BS47-1.5	0.0177	0.0007	0.282544
1183	Mylonitizcd diorite	436	Xiaoxigong	17DJQ11-1-27	0.0178	0.0008	0.282507
1184	Mylonitizcd diorite	436	Xiaoxigong	17DJQ11-1-28	0.0213	0.0009	0.282465
1185	Augen gneiss	436	Xiaoxigong	17DJQ8-10-3-06	0.0195	0.000916	0.28252
1186	Augen gneiss	436	Xiaoxigong	17DJQ8-10-3-18	0.0127	0.000626	0.282515
1187	Augen gneiss	436	Xiaoxigong	17DJQ14-1-1-18	0.0281	0.001281	0.282709
1188	Augen gneiss	436	Xiaoxigong	17DJQ14-1-2-02	0.0152	0.000738	0.282666
1189	granite	437	Mingshujing	XJ11-143-05	0.026856	0.001055	0.28272
1190	granite	437	Mingshujing	XJ11-143-06	0.014619	0.000588	0.28264
1191	granite	437	Mingshujing	XJ11-143-09	0.026792	0.001065	0.282675
1192	granite	437	Mingshujing	XJ11-143-17	0.021522	0.00084	0.28265
1193	granite	437	Mingshujing	XJ11-143-19	0.028076	0.001205	0.282739
1194	granite	437	Mingshujing	XJ11-143-24	0.035045	0.001344	0.282753
1195	diorite	437	Mingshujing	XJ11-140-12	0.009067	0.000424	0.282643
1196	diorite	437	Mingshujing	XJ11-140-22	0.033252	0.001451	0.282754
1197	pyroxene diorite	437	Mingshujing	XJ11-150-18	0.016983	0.000815	0.282504
1198	mylonitic granite	437	Mazongshan	10SYQ05-6	0.036513	0.00131	0.282477
1199	granodiorite	437	Jinwozi	JWZ31-7-01	0.069884	0.001969	0.282462
1200	granodiorite	437	Jinwozi	JWZ20-4-02	0.071445	0.001983	0.282456
1201	Mylonitizcd diorite	437	Xiaoxigong	15BS50-2.1	0.0165	0.0006	0.282518
1202	Mylonitizcd diorite	437	Xiaoxigong	15BS50-2.4	0.0242	0.0009	0.282392
1203	Mylonitizcd diorite	437	Xiaoxigong	17DJQ11-1-30	0.0106	0.0005	0.282545
1204	Augen gneiss	437	Xiaoxigong	17DJQ8-10-3-01	0.0081	0.000407	0.282559
1205	Augen gneiss	437	Xiaoxigong	17DJQ14-1-2-10	0.0124	0.00062	0.282592
1206	Mylonitizcd diorite	437	Xiaoxigong	15BS51-1.11	0.0139	0.0005	0.282626
1207	granite	438	Mingshujing	XJ11-143-08	0.01931	0.000766	0.282632
1208	granite	438	Mingshujing	XJ11-143-14	0.032565	0.001383	0.282734
1209	granite	438	Mingshujing	XJ11-143-18	0.018852	0.000761	0.282648
1210	diorite	438	Mingshujing	XJ11-140-07	0.056836	0.002344	0.282859
1211	diorite	438	Mingshujing	XJ11-140-13	0.002954	0.000147	0.28264
1212	granitic gneiss	438	Mazongshan	10SYQ03-15	0.023837	0.000871	0.282322
1213	mylonitized granite	438	Hongliuxia	X10-54-1-03	0.0337496	0.0012778	0.28251
1214	mylonitized granite	438	Hongliuxia	X10-54-1-04	0.0302567	0.00123437	0.282488
1215	mylonitized granite	438	Hongliuxia	X10-54-1-05	0.055139	0.00177933	0.282561
1216	mylonitized granite	438	Hongliuxia	X10-54-1-22	0.0485969	0.00165084	0.282497
1217	mylonitized granite	438	Hongliuxia	X10-54-1-23	0.031272	0.00123003	0.282498
1218	mylonitized granite	438	Hongliuxia	X10-54-1-24	0.0347582	0.00137106	0.282594
1219	mylonitized granite	438	Hongliuxia	X10-54-1-27	0.0242957	0.00100029	0.28231
1220	mylonitized granite	438	Hongliuxia	X10-54-1-28	0.0151387	0.000593768	0.282361
1221	mylonitized granite	438	Hongliuxia	X10-54-1-30	0.0530071	0.00169791	0.282714
1222	Mylonitizcd diorite	438	Xiaoxigong	15BS47-1.20	0.0152	0.0006	0.282564
1223	Mylonitizcd diorite	438	Xiaoxigong	15BS50-2.16	0.0115	0.0005	0.282524
1224	Augen gneiss	438	Xiaoxigong	17DJQ8-10-2-09	0.0101	0.000507	0.282471
1225	Augen gneiss	438	Xiaoxigong	17DJQ8-10-2-15	0.0203	0.000898	0.282492
1226	Augen gneiss	438	Xiaoxigong	17DJQ8-10-3-14	0.0135	0.00066	0.28255
1227	Augen gneiss	438	Xiaoxigong	17DJQ14-1-1-19	0.0077	0.000389	0.282623
1228	Augen gneiss	438	Xiaoxigong	17DJQ14-1-2-14	0.0172	0.000865	0.282722
1229	granite	439	Mingshujing	XJ11-143-03	0.016104	0.000643	0.282656
1230	granite	439	Mingshujing	XJ11-143-07	0.017964	0.000743	0.282669
1231	granite	439	Shibanjing	X10-77-1-01	0.0213703	0.000848292	0.282207
1232	granite	439	Shibanjing	X10-77-1-02	0.0359581	0.0014138	0.282311
1233	granite	439	Shibanjing	X10-77-1-03	0.0629037	0.00244672	0.282373
1234	granite	439	Shibanjing	X10-77-1-05	0.048355	0.00186411	0.282319
1235	granite	439	Shibanjing	X10-77-1-06	0.029907	0.00117445	0.282217
1236	granite	439	Shibanjing	X10-77-1-07	0.0313726	0.00124112	0.282383
1237	granite	439	Shibanjing	X10-77-1-09	0.0473707	0.00182983	0.282354
1238	granite	439	Shibanjing	X10-77-1-11	0.0508344	0.00199044	0.282346
1239	granite	439	Shibanjing	X10-77-1-12	0.0749885	0.00278144	0.282436
1240	granite	439	Shibanjing	X10-77-1-14	0.0507086	0.00195109	0.282368
1241	granite	439	Shibanjing	X10-77-1-19	0.0541952	0.00206537	0.282329
1242	granite	439	Shibanjing	X10-77-1-20	0.0312972	0.00137723	0.282172
1243	granite	439	Shibanjing	X10-77-1-22	0.0322031	0.00135874	0.282286
1244	granite	439	Shibanjing	X10-77-1-23	0.0485597	0.00192028	0.282354
1245	granite	439	Shibanjing	X10-77-1-26	0.048537	0.00213854	0.282308
1246	granite	439	Shibanjing	X10-77-1-28	0.0296117	0.00116604	0.282296
1247	granite	439	Shibanjing	X10-77-1-29	0.0401562	0.0018827	0.282339
1248	granite	439	Shibanjing	X10-77-1-30	0.0220327	0.000911863	0.282361
1249	Augen gneiss	439	Xiaoxigong	17DJQ8-10-1-13	0.0125	0.000594	0.282537
1250	Augen gneiss	439	Xiaoxigong	17DJQ14-1-1-03	0.012	0.000592	0.282634
1251	Augen gneiss	439	Xiaoxigong	17DJQ14-1-1-14	0.0112	0.000559	0.282652
1252	Augen gneiss	439	Xiaoxigong	17DJQ14-1-2-04	0.0109	0.000534	0.282678
1253	Augen gneiss	439	Xiaoxigong	17DJQ14-1-2-09	0.0175	0.000831	0.28268
1254	diorite	440	Mingshujing	XJ11-140-11	0.021029	0.000914	0.282657
1255	diorite	440	Mingshujing	XJ11-140-14	0.016985	0.00075	0.282641
1256	diorite	440	Mingshujing	XJ11-140-19	0.014587	0.000679	0.282644
1257	biotite–plagioclase gneiss	440	Mazongshan	10MZS04-8	0.011428	0.000364	0.282668
1258	granodiorite	440	Jinwozi	JWZ20-1-04	0.081874	0.002253	0.282481
1259	Mylonitizcd diorite	440	Xiaoxigong	15BS50-2.2	0.0159	0.0006	0.282482
1260	Mylonitizcd diorite	440	Xiaoxigong	15BS50-2.6	0.0197	0.0008	0.282378
1261	Augen gneiss	440	Xiaoxigong	17DJQ14-1-1-11	0.0217	0.001027	0.282718
1262	Mylonitizcd diorite	440	Xiaoxigong	15BS51-1.12	0.0191	0.0007	0.282579
1263	diorite	441	Mingshujing	XJ11-140-01	0.00526	0.000244	0.28267
1264	diorite	441	Mingshujing	XJ11-140-04	0.01454	0.000668	0.282631
1265	diorite	441	Mingshujing	XJ11-140-08	0.0381	0.001635	0.282755
1266	diorite	441	Mingshujing	XJ11-140-10	0.033623	0.001416	0.282744
1267	diorite	441	Mingshujing	XJ11-140-15	0.031989	0.001362	0.282717
1268	diorite	441	Mingshujing	XJ11-140-21	0.041231	0.001778	0.282836
1269	diorite	441	Mingshujing	XJ11-140-24	0.015034	0.000693	0.282697
1270	mylonitic granite	441	Mazongshan	10SYQ05-4	0.040601	0.001547	0.282498
1271	granodiorite	441	Jinwozi	JWZ31-7-10	0.0194	0.000588	0.281725
1272	Mylonitizcd diorite	441	Xiaoxigong	15BS47-1.13	0.0089	0.0004	0.282568
1273	Mylonitizcd diorite	441	Xiaoxigong	15BS47-1.19	0.0115	0.0004	0.282579
1274	Augen gneiss	441	Xiaoxigong	17DJQ8-10-2-07	0.0071	0.000356	0.28252
1275	diorite	442	Mingshujing	XJ11-140-05	0.023907	0.00105	0.282684
1276	diorite	442	Mingshujing	XJ11-140-09	0.031657	0.001382	0.282712
1277	mylonitic granite	442	Mazongshan	10SYQ05-19	0.037519	0.001377	0.282484
1278	Mylonitizcd diorite	442	Xiaoxigong	15BS50-2.7	0.0135	0.0006	0.282494
1279	Augen gneiss	442	Xiaoxigong	17DJQ8-10-2-18	0.0096	0.000475	0.282603
1280	Augen gneiss	442	Xiaoxigong	17DJQ14-1-1-04	0.0168	0.000869	0.282701
1281	diorite	443	Mingshujing	XJ11-140-06	0.007828	0.000361	0.282657
1282	diorite	443	Mingshujing	XJ11-140-17	0.019159	0.000852	0.282673
1283	diorite	443	Mingshujing	XJ11-140-20	0.013189	0.000561	0.282686
1284	mylonitic granite	443	Mazongshan	10SYQ05-15	0.042974	0.001538	0.28238
1285	mylonitized granite	443	Hongliuxia	X10-50-1-03	0.0274613	0.000880158	0.282501
1286	mylonitized granite	443	Hongliuxia	X10-50-1-04	0.0318905	0.00102466	0.282537
1287	mylonitized granite	443	Hongliuxia	X10-50-1-06	0.022405	0.000712398	0.282528
1288	mylonitized granite	443	Hongliuxia	X10-50-1-07	0.0301229	0.00102596	0.282388
1289	mylonitized granite	443	Hongliuxia	X10-50-1-09	0.0376819	0.00127499	0.28241
1290	mylonitized granite	443	Hongliuxia	X10-50-1-11	0.0677502	0.00243223	0.282592
1291	mylonitized granite	443	Hongliuxia	X10-50-1-12	0.0588631	0.00209055	0.282658
1292	mylonitized granite	443	Hongliuxia	X10-50-1-13	0.0651139	0.00230482	0.282699
1293	mylonitized granite	443	Hongliuxia	X10-50-1-14	0.0370869	0.00136272	0.282568
1294	mylonitized granite	443	Hongliuxia	X10-50-1-16	0.0241132	0.000878697	0.282604
1295	mylonitized granite	443	Hongliuxia	X10-50-1-19	0.0266506	0.000965473	0.282632
1296	mylonitized granite	443	Hongliuxia	X10-50-1-20	0.0572183	0.00203962	0.282649
1297	mylonitized granite	443	Hongliuxia	X10-50-1-24	0.0639608	0.00204201	0.282622
1298	Mylonitizcd diorite	443	Xiaoxigong	15BS47-1.10	0.0098	0.0004	0.282547
1299	Mylonitizcd diorite	443	Xiaoxigong	15BS47-1.14	0.008	0.0003	0.282531
1300	Mylonitizcd diorite	443	Xiaoxigong	15BS47-1.18	0.0107	0.0004	0.282534
1301	Mylonitizcd diorite	443	Xiaoxigong	15BS47-1.21	0.0158	0.0006	0.282551
1302	Mylonitizcd diorite	443	Xiaoxigong	15BS50-2.9	0.0073	0.0003	0.282491
1303	Mylonitizcd diorite	443	Xiaoxigong	15BS50-2.12	0.0271	0.0011	0.28244
1304	Biotite granite	443	Xiaoxigong	17DJQ10-1-25	0.0081	0.0003	0.282465
1305	Augen gneiss	443	Xiaoxigong	17DJQ8-10-1-17	0.0072	0.000369	0.28257
1306	Augen gneiss	443	Xiaoxigong	17DJQ14-1-2-08	0.0172	0.000798	0.282693
1307	diorite	444	Mingshujing	XJ11-140-23	0.015425	0.000702	0.282646
1308	pyroxene diorite	444	Mingshujing	XJ11-150-04	0.009575	0.000446	0.282454
1309	mylonitic granite	444	Mazongshan	10SYQ05-1	0.038423	0.001506	0.282316
1310	mylonitized granite	444	Hongliuxia	X10-49-1-01	0.0320282	0.00122811	0.282618
1311	mylonitized granite	444	Hongliuxia	X10-49-1-03	0.0283339	0.00103145	0.282599
1312	mylonitized granite	444	Hongliuxia	X10-49-1-04	0.0169697	0.000594251	0.282626
1313	mylonitized granite	444	Hongliuxia	X10-49-1-05	0.0492764	0.0017418	0.282523
1314	mylonitized granite	444	Hongliuxia	X10-49-1-06	0.0434864	0.00161025	0.282546
1315	mylonitized granite	444	Hongliuxia	X10-49-1-07	0.0169704	0.000661732	0.282557
1316	mylonitized granite	444	Hongliuxia	X10-49-1-08	0.0211724	0.000788548	0.282429
1317	mylonitized granite	444	Hongliuxia	X10-49-1-09	0.0226352	0.000816316	0.282596
1318	mylonitized granite	444	Hongliuxia	X10-49-1-10	0.0363204	0.00138175	0.282633
1319	mylonitized granite	444	Hongliuxia	X10-49-1-12	0.0438238	0.00166727	0.28265
1320	mylonitized granite	444	Hongliuxia	X10-49-1-19	0.0363684	0.00130315	0.282609
1321	mylonitized granite	444	Hongliuxia	X10-49-1-20	0.0164831	0.000684706	0.282597
1322	mylonitized granite	444	Hongliuxia	X10-49-1-22	0.0332211	0.00125039	0.282622
1323	mylonitized granite	444	Hongliuxia	X10-49-1-14	0.0246012	0.000978004	0.282459
1324	mylonitized granite	444	Hongliuxia	X10-49-1-21	0.0509772	0.00182574	0.282547
1325	mylonitized granite	444	Hongliuxia	X10-49-1-17	0.0917008	0.00312703	0.282781
1326	Mylonitizcd diorite	444	Xiaoxigong	15BS47-1.15	0.0168	0.0007	0.282579
1327	Mylonitizcd diorite	444	Xiaoxigong	15BS47-1.12	0.0092	0.0004	0.282568
1328	Mylonitizcd diorite	444	Xiaoxigong	15BS47-1.17	0.0136	0.0006	0.282506
1329	Augen gneiss	444	Xiaoxigong	17DJQ8-10-2-12	0.0121	0.000584	0.282588
1330	Augen gneiss	444	Xiaoxigong	17DJQ8-10-2-19	0.0089	0.00042	0.282547
1331	Augen gneiss	444	Xiaoxigong	17DJQ14-1-1-25	0.024	0.001166	0.28265
1332	pyroxene diorite	445	Mingshujing	XJ11-150-14	0.009857	0.000401	0.282653
1333	mylonitic granite	445	Mazongshan	10SYQ05-24	0.03311	0.001199	0.282364
1334	granite	445	Shibanjing	X10-69-1-01	0.0189774	0.000785277	0.282343
1335	granite	445	Shibanjing	X10-69-1-02	0.0157646	0.000588919	0.282393
1336	granite	445	Shibanjing	X10-69-1-03	0.0435727	0.00158671	0.282393
1337	granite	445	Shibanjing	X10-69-1-04	0.0404342	0.00152554	0.28244
1338	granite	445	Shibanjing	X10-69-1-05	0.0326552	0.00123333	0.282354
1339	granite	445	Shibanjing	X10-69-1-06	0.0384253	0.00141686	0.282368
1340	granite	445	Shibanjing	X10-69-1-07	0.0237397	0.000923413	0.282417
1341	granite	445	Shibanjing	X10-69-1-08	0.03061	0.0011472	0.282408
1342	granite	445	Shibanjing	X10-69-1-09	0.0291132	0.0010901	0.282369
1343	granite	445	Shibanjing	X10-69-1-10	0.0346881	0.00125349	0.28235
1344	granite	445	Shibanjing	X10-69-1-11	0.0129019	0.00055504	0.282313
1345	granite	445	Shibanjing	X10-69-1-12	0.0386947	0.00139317	0.282342
1346	granite	445	Shibanjing	X10-69-1-13	0.0141719	0.000570375	0.282328
1347	granite	445	Shibanjing	X10-69-1-14	0.0434726	0.00159056	0.282424
1348	granite	445	Shibanjing	X10-69-1-15	0.0225817	0.000869431	0.28245
1349	granite	445	Shibanjing	X10-69-1-16	0.00983077	0.00045791	0.28235
1350	granodiorite	445	Jinwozi	JWZ20-1-06	0.059533	0.001607	0.282505
1351	Augen gneiss	445	Xiaoxigong	17DJQ8-10-2-21	0.0117	0.000548	0.282452
1352	Augen gneiss	445	Xiaoxigong	17DJQ14-1-1-13	0.0082	0.000416	0.282669
1353	pyroxene diorite	446	Mingshujing	XJ11-150-01	0.003525	0.00019	0.282537
1354	pyroxene diorite	446	Mingshujing	XJ11-150-07	0.016983	0.000815	0.282429
1355	granitic gneiss	446	Mazongshan	10SYQ03-8	0.04659	0.001467	0.28236
1356	mylonitic granite	446	Mazongshan	10SYQ05-13	0.04461	0.001476	0.282512
1357	mylonitic granite	446	Mazongshan	10SYQ05-22	0.030901	0.001136	0.282505
1358	mylonitic granite	446	Mazongshan	10SYQ05-23	0.037281	0.001384	0.282502
1359	mylonitized granite	446	Hongliuxia	X10-48-1-01	0.0393822	0.00127153	0.282552
1360	mylonitized granite	446	Hongliuxia	X10-48-1-02	0.0348046	0.00115248	0.282572
1361	mylonitized granite	446	Hongliuxia	X10-48-1-03	0.0314991	0.000944284	0.282522
1362	mylonitized granite	446	Hongliuxia	X10-48-1-04	0.0374041	0.00124086	0.282559
1363	mylonitized granite	446	Hongliuxia	X10-48-1-05	0.0590166	0.00178485	0.282686
1364	mylonitized granite	446	Hongliuxia	X10-48-1-06	0.0424862	0.00153856	0.282616
1365	mylonitized granite	446	Hongliuxia	X10-48-1-07	0.0241862	0.000826351	0.282564
1366	mylonitized granite	446	Hongliuxia	X10-48-1-08	0.0491571	0.00159279	0.282623
1367	mylonitized granite	446	Hongliuxia	X10-48-1-09	0.0567333	0.00172835	0.282612
1368	mylonitized granite	446	Hongliuxia	X10-48-1-10	0.0397483	0.00133063	0.282469
1369	mylonitized granite	446	Hongliuxia	X10-48-1-12	0.0797169	0.0026457	0.282677
1370	mylonitized granite	446	Hongliuxia	X10-48-1-13	0.0301021	0.00099658	0.282558
1371	mylonitized granite	446	Hongliuxia	X10-48-1-14	0.0448443	0.00159198	0.282589
1372	mylonitized granite	446	Hongliuxia	X10-48-1-16	0.0598754	0.00189909	0.282609
1373	mylonitized granite	446	Hongliuxia	X10-48-1-17	0.0390256	0.00137159	0.282565
1374	mylonitized granite	446	Hongliuxia	X10-48-1-18	0.0433878	0.001469	0.282635
1375	mylonitized granite	446	Hongliuxia	X10-48-1-19	0.0353192	0.0011894	0.282606
1376	mylonitized granite	446	Hongliuxia	X10-48-1-21	0.0414982	0.00141705	0.282568
1377	mylonitized granite	446	Hongliuxia	X10-48-1-22	0.0565792	0.00203751	0.282643
1378	mylonitized granite	446	Hongliuxia	X10-48-1-23	0.0406152	0.00131111	0.282611
1379	mylonitized granite	446	Hongliuxia	X10-48-1-24	0.0593139	0.00186186	0.282624
1380	mylonitized granite	446	Hongliuxia	X10-48-1-25	0.0265346	0.000915027	0.282572
1381	Mylonitizcd diorite	446	Xiaoxigong	15BS50-2.8	0.01	0.0004	0.282482
1382	Mylonitizcd diorite	446	Xiaoxigong	15BS50-2.11	0.0195	0.0008	0.282535
1383	Augen gneiss	446	Xiaoxigong	17DJQ8-10-2-24	0.0089	0.000442	0.282558
1384	Augen gneiss	446	Xiaoxigong	17DJQ8-10-2-23	0.0129	0.000637	0.282505
1385	Augen gneiss	446	Xiaoxigong	17DJQ14-1-2-13	0.0134	0.00072	0.282646
1386	mylonitic granite	447	Mazongshan	10SYQ05-21	0.035104	0.00124	0.282424
1387	Bt-granodiorite	447	Mazongshan	ZT001-11	0.030048	0.001106	0.282462
1388	Augen gneiss	447	Xiaoxigong	17DJQ14-1-1-12	0.0181	0.000903	0.28274
1389	Mylonitizcd diorite	447	Xiaoxigong	15BS51-1.16	0.0147	0.0006	0.282635
1390	pyroxene diorite	448	Mingshujing	XJ11-150-09	0.044472	0.001675	0.282254
1391	pyroxene diorite	448	Mingshujing	XJ11-150-16	0.024405	0.001076	0.282515
1392	pyroxene diorite	448	Mingshujing	XJ11-150-17	0.043773	0.001599	0.282549
1393	mylonitic granite	448	Mazongshan	10SYQ05-20	0.018737	0.000694	0.282224
1394	Biotite granite	448	Xiaoxigong	17DJQ10-1-17	0.0114	0.0004	0.282441
1395	Augen gneiss	448	Xiaoxigong	17DJQ8-10-2-22	0.0097	0.000459	0.282545
1396	Augen gneiss	448	Xiaoxigong	17DJQ14-1-1-10	0.0124	0.000612	0.282702
1397	Mylonitizcd diorite	448	Xiaoxigong	15BS51-1.21	0.0113	0.0004	0.282636
1398	pyroxene diorite	449	Mingshujing	XJ11-150-19	0.087019	0.003062	0.282535
1399	pyroxene diorite	449	Mingshujing	XJ11-150-22	0.012681	0.000516	0.282681
1400	mylonitic granite	449	Mazongshan	10SYQ05-12	0.038151	0.001337	0.282509
1401	Augen gneiss	449	Xiaoxigong	17DJQ14-1-3-28	0.0129	0.000631	0.282705
1402	Augen gneiss	449	Xiaoxigong	17DJQ14-1-3-29	0.0176	0.000878	0.282742
1403	Augen gneiss	449	Xiaoxigong	17DJQ14-1-3-30	0.0161	0.00077	0.282707
1404	Augen gneiss	449	Xiaoxigong	17DJQ14-1-3-31	0.0137	0.000682	0.28264
1405	pyroxene diorite	450	Mingshujing	XJ11-150-10	0.012681	0.000516	0.282469
1406	pyroxene diorite	450	Mingshujing	XJ11-150-12	0.016219	0.000728	0.282506
1407	granitic gneiss	450	Mazongshan	10SYQ03-19	0.023571	0.000843	0.282299
1408	mylonitic granite	450	Mazongshan	10SYQ05-8	0.030677	0.001194	0.282442
1409	diorite	450	Shibanjing	X10-73-1-01	0.0104507	0.000454227	0.282192
1410	diorite	450	Shibanjing	X10-73-1-02	0.0238622	0.000975751	0.282127
1411	diorite	450	Shibanjing	X10-73-1-03	0.0102515	0.000432579	0.282119
1412	diorite	450	Shibanjing	X10-73-1-04	0.00919742	0.000399634	0.282151
1413	diorite	450	Shibanjing	X10-73-1-05	0.0126308	0.000518986	0.282149
1414	diorite	450	Shibanjing	X10-73-1-06	0.0103167	0.000432212	0.28211
1415	diorite	450	Shibanjing	X10-73-1-07	0.0120049	0.000522276	0.282084
1416	diorite	450	Shibanjing	X10-73-1-08	0.0181246	0.000728795	0.282084
1417	diorite	450	Shibanjing	X10-73-1-09	0.0103768	0.000436879	0.282088
1418	diorite	450	Shibanjing	X10-73-1-11	0.0152522	0.000631202	0.282118
1419	diorite	450	Shibanjing	X10-73-1-12	0.024999	0.00102831	0.282126
1420	diorite	450	Shibanjing	X10-73-1-14	0.0048747	0.000161263	0.28202
1421	diorite	450	Shibanjing	X10-73-1-15	0.0100364	0.000432046	0.282112
1422	Mylonitizcd diorite	450	Xiaoxigong	15BS50-2.3	0.0151	0.0006	0.282566
1423	Mylonitizcd diorite	450	Xiaoxigong	15BS50-2.18	0.022	0.001	0.282516
1424	Augen gneiss	450	Xiaoxigong	17DJQ14-1-1-02	0.0197	0.000987	0.282697
1425	Augen gneiss	450	Xiaoxigong	17DJQ14-1-3-27	0.0141	0.000695	0.282688
1426	pyroxene diorite	451	Mingshujing	XJ11-150-13	0.003525	0.00019	0.282139
1427	mylonitic granite	451	Mazongshan	10SYQ05-14	0.034662	0.001318	0.282498
1428	granodiorite	451	Jinwozi	JWZ31-7-05	0.054187	0.001501	0.282443
1429	Mylonitizcd diorite	451	Xiaoxigong	15BS50-2.14	0.0306	0.0012	0.282501
1430	mylonitic granite	452	Mazongshan	10SYQ05-5	0.034622	0.001335	0.282506
1431	mylonitic granite	452	Mazongshan	10SYQ08-15	0.09593	0.002704	0.282215
1432	mylonitic monzogranite	452	Yuejinshan	Z005-15	0.063454	0.002184	0.282579
1433	Mylonitizcd diorite	452	Xiaoxigong	15BS50-2.10	0.0136	0.0006	0.282541
1434	Augen gneiss	452	Xiaoxigong	17DJQ14-1-3-22	0.0176	0.000815	0.28274
1435	pyroxene diorite	453	Mingshujing	XJ11-150-03	0.008994	0.000404	0.282278
1436	pyroxene diorite	453	Mingshujing	XJ11-150-08	0.087019	0.003062	0.282168
1437	mylonitic granite	453	Mazongshan	10SYQ05-11	0.014678	0.000546	0.282237
1438	mylonitic granite	454	Mazongshan	10SYQ08-14	0.08456	0.002556	0.282342
1439	Augen gneiss	454	Xiaoxigong	17DJQ14-1-3-20	0.022	0.001053	0.28269
1440	Augen gneiss	454	Xiaoxigong	17DJQ14-1-3-21	0.0212	0.001053	0.282681
1441	Augen gneiss	454	Xiaoxigong	17DJQ14-1-3-24	0.0137	0.000656	0.282695
1442	mylonitic granite	455	Mazongshan	10SYQ05-7	0.055047	0.001781	0.282469
1443	mylonitized granite	455	Hongliuxia	X10-52-1-22	0.029192	0.000941205	0.282636
1444	diorite	455	Shibanjing	X10-71-1-01	0.00801364	0.000328622	0.282076
1445	diorite	455	Shibanjing	X10-71-1-02	0.00889332	0.000368612	0.282098
1446	diorite	455	Shibanjing	X10-71-1-03	0.0084674	0.000350583	0.282089
1447	diorite	455	Shibanjing	X10-71-1-04	0.00974554	0.00040626	0.282099
1448	diorite	455	Shibanjing	X10-71-1-05	0.00880208	0.000362042	0.282105
1449	diorite	455	Shibanjing	X10-71-1-06	0.00837964	0.000346737	0.282142
1450	diorite	455	Shibanjing	X10-71-1-07	0.0112696	0.000460119	0.282104
1451	diorite	455	Shibanjing	X10-71-1-08	0.0137286	0.000562429	0.282097
1452	diorite	455	Shibanjing	X10-71-1-09	0.0111974	0.000461314	0.282121
1453	diorite	455	Shibanjing	X10-71-1-10	0.00851657	0.000350413	0.282121
1454	diorite	455	Shibanjing	X10-71-1-11	0.0118823	0.00048396	0.282154
1455	diorite	455	Shibanjing	X10-71-1-12	0.0116453	0.000472208	0.282111
1456	diorite	455	Shibanjing	X10-71-1-13	0.010866	0.000429582	0.282101
1457	diorite	455	Shibanjing	X10-71-1-14	0.0113916	0.000458116	0.28213
1458	diorite	455	Shibanjing	X10-71-1-15	0.0075918	0.000316455	0.282147
1459	diorite	455	Shibanjing	X10-71-1-16	0.0137352	0.000550862	0.282154
1460	diorite	455	Shibanjing	X10-71-1-17	0.00874799	0.000352387	0.282116
1461	granodiorite	455	Jinwozi	JWZ20-1-05	0.048551	0.001313	0.28244
1462	Augen gneiss	456	Xiaoxigong	17DJQ14-1-3-19	0.0154	0.00075	0.282725
1463	Augen gneiss	456	Xiaoxigong	17DJQ14-1-3-23	0.0151	0.000747	0.282722
1464	Augen gneiss	457	Xiaoxigong	17DJQ14-1-3-25	0.0286	0.001339	0.282744
1465	augen gneiss	459	Mazongshan	10SYQ07-13	0.011412	0.00043	0.28234
1466	augen gneiss	460	Mazongshan	10SYQ07-2	0.03455	0.00121	0.282282
1467	granitic gneiss	463	Mazongshan	10SYQ03-16	0.017376	0.000645	0.282331
1468	mylonitic granite	463	Mazongshan	10SYQ08-6	0.104697	0.003059	0.282314
1469	granitic gneiss	464	Mazongshan	10SYQ03-10	0.015941	0.000627	0.282362
1470	mylonitic granite	464	Mazongshan	10SYQ05-9	0.032858	0.001229	0.282502
1471	augen gneiss	464	Mazongshan	10SYQ07-6	0.040941	0.001468	0.282317
1472	augen gneiss	464	Mazongshan	10SYQ07-10	0.029206	0.000997	0.282329
1473	granitic gneiss	465	Mazongshan	10SYQ03-17	0.025837	0.001005	0.282338
1474	augen gneiss	465	Mazongshan	10SYQ07-3	0.026668	0.00092	0.282325
1475	augen gneiss	465	Mazongshan	10SYQ07-11	0.028113	0.000989	0.282329
1476	augen gneiss	466	Mazongshan	10SYQ07-4	0.042123	0.001375	0.282382
1477	diorite	466	Shibanjing	X10-70-1-01	0.00989527	0.000419112	0.282077
1478	diorite	466	Shibanjing	X10-70-1-04	0.0159392	0.000621715	0.282097
1479	diorite	466	Shibanjing	X10-70-1-05	0.00933112	0.000384979	0.282107
1480	diorite	466	Shibanjing	X10-70-1-06	0.0131945	0.000531049	0.282111
1481	diorite	466	Shibanjing	X10-70-1-07	0.0183651	0.000697521	0.282047
1482	diorite	466	Shibanjing	X10-70-1-08	0.0119736	0.000507055	0.282081
1483	diorite	466	Shibanjing	X10-70-1-10	0.00831035	0.000356839	0.282124
1484	diorite	466	Shibanjing	X10-70-1-11	0.0139707	0.000566128	0.282138
1485	diorite	466	Shibanjing	X10-70-1-12	0.00837538	0.000349533	0.282124
1486	diorite	466	Shibanjing	X10-70-1-13	0.0106154	0.000424604	0.282088
1487	diorite	466	Shibanjing	X10-70-1-14	0.0187183	0.000743744	0.282143
1488	diorite	466	Shibanjing	X10-70-1-15	0.00998517	0.000447066	0.28215
1489	diorite	466	Shibanjing	X10-70-1-16	0.00978282	0.000395764	0.282076
1490	diorite	466	Shibanjing	X10-70-1-17	0.00974327	0.000408962	0.282128
1491	diorite	466	Shibanjing	X10-70-1-18	0.0128733	0.000523655	0.282102
1492	granitic gneiss	467	Mazongshan	10SYQ03-18	0.020074	0.000772	0.282324
1493	augen gneiss	467	Mazongshan	10SYQ07-7	0.040038	0.00136	0.282276
1494	Augen gneiss	467	Xiaoxigong	17DJQ14-1-3-26	0.0159	0.000781	0.282668
1495	granitic gneiss	468	Mazongshan	10SYQ03-21	0.012657	0.000522	0.282323
1496	mylonitic granite	469	Mazongshan	10SYQ05-2	0.035332	0.001279	0.282292
1497	mylonitic granite	469	Mazongshan	10SYQ08-17	0.038714	0.00141	0.282332
1498	monzogranite	469	Baixianishan	MSD09821-6.1-5	0.07892	0.002024	0.282685
1499	granitic gneiss	470	Mazongshan	10SYQ03-14	0.020676	0.000785	0.282299
1500	mylonitic granite	471	Mazongshan	10SYQ05-25	0.023214	0.000894	0.282291
1501	granitic gneiss	472	Mazongshan	10SYQ03-23	0.017806	0.000717	0.282325
1502	mylonitized granite	472	Hongliuxia	X10-51-1-23	0.023291	0.000878136	0.282548
1503	pyroxene diorite	473	Mingshujing	XJ11-150-15	0.009575	0.000446	0.282015
1504	mylonitized granite	473	Hongliuxia	X10-51-1-12	0.0366131	0.00133842	0.282612
1505	granitic gneiss	475	Mazongshan	10SYQ03-13	0.018301	0.00075	0.282339
1506	augen gneiss	475	Mazongshan	10SYQ07-12	0.040324	0.001453	0.282274
1507	mylonitic granite	475	Mazongshan	10SYQ08-10	0.09242	0.002814	0.282359
1508	mylonitic granite	476	Mazongshan	10SYQ08-12	0.089107	0.002656	0.282305
1509	granitic gneiss	479	Mazongshan	10SYQ03-20	0.0181	0.000747	0.282316
1510	Bt-granodiorite	479	Mazongshan	ZT001-14	0.046011	0.001543	0.282398
1511	diorite	480	Shibanjing	X10-70-1-09	0.0163773	0.000604693	0.282082
1512	mylonitic granite	482	Mazongshan	10SYQ08-9	0.072658	0.002227	0.282341
1513	granitic gneiss	484	Mazongshan	10SYQ03-7	0.019524	0.000768	0.282337
1514	mylonitic granite	484	Mazongshan	10SYQ05-3	0.02837	0.001029	0.282203
1515	monzogranite	486	Baixianishan	MSD09821-6.1-8	0.065993	0.001379	0.282582
1516	granitic gneiss	487	Mazongshan	10SYQ03-4	0.020666	0.000816	0.282338
1517	mylonitic granite	487	Mazongshan	10SYQ08-3	0.063461	0.002219	0.282309
1518	granitic gneiss	488	Mazongshan	10SYQ03-12	0.012982	0.000558	0.282356
1519	granitic gneiss	489	Mazongshan	10SYQ03-2	0.036009	0.00126	0.282362
1520	granitic gneiss	490	Mazongshan	10SYQ03-11	0.017324	0.000704	0.282331
1521	granitic gneiss	491	Mazongshan	10SYQ03-6	0.020258	0.00078	0.282317
1522	granitic gneiss	491	Mazongshan	10SYQ03-9	0.02918	0.001062	0.282353
1523	augen gneiss	491	Mazongshan	10SYQ07-14	0.029666	0.001041	0.282296
1524	granitic gneiss	495	Hongshishan	10HSS01-5	0.056463	0.001932	0.282314
1525	augen gneiss	495	Mazongshan	10SYQ07-1	0.049704	0.001693	0.28229
1526	augen gneiss	495	Mazongshan	10SYQ07-8	0.032287	0.001163	0.282293
1527	diorite	496	Shibanjing	X10-70-1-02	0.0104086	0.000431633	0.28211
1528	augen gneiss	500	Mazongshan	10SYQ07-5	0.041349	0.001431	0.282324
1529	augen gneiss	501	Mazongshan	10SYQ07-9	0.06157	0.002301	0.282202
1530	mylonitic granite	501	Mazongshan	10SYQ08-8	0.069084	0.002225	0.282337
1531	granitic gneiss	502	Mazongshan	10SYQ03-3	0.022915	0.000895	0.282334
1532	granitic gneiss	503	Mazongshan	10SYQ03-1	0.019309	0.000779	0.282333
1533	mylonitic monzogranite	504	Yuejinshan	Z005-13	0.04461	0.0016	0.282344
1534	granitic gneiss	506	Mazongshan	10SYQ03-5	0.022427	0.00086	0.282346
1535	augen gneiss	506	Mazongshan	10SYQ07-15	0.06218	0.002092	0.282275
1536	granitic gneiss	515	Mazongshan	10SYQ03-22	0.020704	0.000829	0.28235
1537	plagioclase granite	515	Yueyashan ophiolite	HBS5309-1	0.152433	0.004435	0.282971
1538	Bt-granodiorite	516	Mazongshan	ZT001-12	0.023146	0.000958	0.282514
1539	plagiogranite	520	Baiyunshan ophiolite	Tw4027-3-1	0.040647	0.001774	0.282848
1540	plagiogranite	520	Baiyunshan ophiolite	Tw4027-3-2	0.036625	0.001589	0.28288
1541	plagiogranite	520	Baiyunshan ophiolite	Tw4027-3-3	0.031234	0.001413	0.282859
1542	plagiogranite	520	Baiyunshan ophiolite	Tw4027-3-4	0.043976	0.001898	0.28289
1543	plagiogranite	520	Baiyunshan ophiolite	Tw4027-3-5	0.050476	0.002187	0.282893
1544	plagiogranite	520	Baiyunshan ophiolite	Tw4027-3-6	0.051363	0.002218	0.282884
1545	plagiogranite	520	Baiyunshan ophiolite	Tw4027-3-7	0.044698	0.001948	0.282765
1546	plagioclase granite	525	Yueyashan ophiolite	HBS5309-12	0.110501	0.0037	0.282924
1547	plagioclase granite	530	Yueyashan ophiolite	HBS5309-2	0.120447	0.003657	0.283002
1548	plagioclase granite	533	Yueyashan ophiolite	HBS5309-11	0.165812	0.005297	0.282959
1549	plagioclase granite	534	Yueyashan ophiolite	HBS5309-10	0.150306	0.004826	0.282976
1550	plagioclase granite	535	Yueyashan ophiolite	HBS5309-3	0.083238	0.002675	0.28294
1551	plagioclase granite	537	Yueyashan ophiolite	HBS5309-6	0.13491	0.004326	0.282925
1552	plagioclase granite	538	Yueyashan ophiolite	HBS5309-5	0.0878	0.00287	0.282977
1553	plagioclase granite	538.3	Yueyashan ophiolite	HBS5309-9	0.168795	0.005236	0.282882
1554	plagioclase granite	543.6	Yueyashan ophiolite	HBS5309-4	0.163014	0.004803	0.283094
1555	plagioclase granite	545	Yueyashan ophiolite	HBS5309-7	0.078504	0.002565	0.282919
1556	plagioclase granite	548	Yueyashan ophiolite	HBS5309-8	0.068924	0.002274	0.282901
1557	granitic gneiss	849	Hongshishan	10HSS01-13	0.055955	0.001904	0.282384
1558	gneiss	868	Baidunzi	X10-37-1-10	0.097211	0.001517	0.282199
1559	gneiss	877	Baidunzi	X10-37-1-49	0.099652	0.001672	0.282266
1560	augen gneiss	879.71	Gubaoquan	X11-101-1-15	0.0399992	0.00121378	0.2824
1561	gneiss	881	Baidunzi	X10-37-1-30	0.073304	0.00123	0.282252
1562	augen two-mica granitic gneiss	881.26	Gubaoquan	X11-97-2_23	0.04565	0.00136593	0.282191
1563	augen gneiss	882.868	Gubaoquan	X11-101-1-12	0.0362865	0.00110291	0.282432
1564	two-mica granitic gneiss	883.682	Gubaoquan	X11-100-1-08	0.057446	0.00153222	0.282265
1565	two-mica granitic gneiss	883.857	Gubaoquan	X11-100-1-36	0.0796308	0.00241625	0.282099
1566	mylonitized monzonite	884	Baishantang	TW8823-1	0.051668	0.00152155	0.282164
1567	mylonitized monzonite	884	Baishantang	TW8823-3	0.0428461	0.00129673	0.282183
1568	mylonitized monzonite	884	Baishantang	TW8823-6	0.0696983	0.00185383	0.282252
1569	mylonitized monzonite	884	Baishantang	TW8823-7	0.106606	0.00265942	0.282226
1570	mylonitized monzonite	884	Baishantang	TW8823-8	0.0529148	0.0015783	0.282193
1571	mylonitized monzonite	884	Baishantang	TW8823-9	0.0478367	0.00140075	0.282159
1572	mylonitized monzonite	884	Baishantang	TW8823-10	0.0634248	0.00159135	0.28216
1573	mylonitized monzonite	884	Baishantang	TW8823-12	0.0433969	0.00129888	0.282177
1574	mylonitized monzonite	884	Baishantang	TW8823-13	0.0619556	0.00160818	0.28223
1575	mylonitized monzonite	884	Baishantang	TW8823-14	0.0646273	0.00183857	0.282161
1576	mylonitized monzonite	884	Baishantang	TW8823-20	0.0763832	0.00202853	0.282209
1577	two-mica granitic gneiss	884.045	Gubaoquan	X11-100-1-07	0.101259	0.00271386	0.282344
1578	two-mica plagioclase gneiss	884.833	Gubaoquan	X11-99-1-07	0.0666757	0.00187087	0.282237
1579	augen gneiss	885.581	Gubaoquan	X11-101-1_27	0.0187168	0.00060531	0.282131
1580	augen gneiss	886.244	Gubaoquan	X11-101-1-01	0.0534312	0.00144914	0.282188
1581	two-mica granitic gneiss	886.439	Gubaoquan	X11-100-1-05	0.0751112	0.00204006	0.28224
1582	augen gneiss	886.942	Gubaoquan	X11-101-1-06	0.167094	0.00472237	0.282585
1583	two-mica granitic gneiss	887.62	Gubaoquan	X11-100-1-26	0.108345	0.00323447	0.28219
1584	gneiss	888	Baidunzi	X10-37-1-32	0.099656	0.001675	0.282219
1585	two-mica granitic gneiss	888.042	Gubaoquan	X11-100-1-14	0.0208292	0.000633733	0.281918
1586	augen gneiss	888.326	Gubaoquan	X11-101-1-18	0.0539568	0.00160963	0.282327
1587	augen gneiss	889.256	Gubaoquan	X11-101-1_28	0.0533232	0.00154772	0.282176
1588	two-mica plagioclase gneiss	889.924	Gubaoquan	X11-99-1-11	0.0085831	0.000284193	0.282101
1589	gneiss	890	Baidunzi	X10-37-1-06	0.127931	0.002076	0.282211
1590	gneiss	890	Baidunzi	X10-37-1-44	0.098488	0.001958	0.282199
1591	augen gneiss	890.066	Gubaoquan	X11-99-2-11	0.0272966	0.000836345	0.282276
1592	augen two-mica granitic gneiss	890.078	Gubaoquan	X11-97-2_21	0.0448404	0.00140904	0.282201
1593	augen gneiss	890.131	Gubaoquan	X11-99-2-33	0.0607603	0.00180046	0.282268
1594	augen two-mica granitic gneiss	890.526	Gubaoquan	X11-97-2-03	0.0513022	0.00168099	0.282206
1595	two-mica plagioclase gneiss	890.714	Gubaoquan	X11-99-1-13	0.0690185	0.00174969	0.282252
1596	two-mica granitic gneiss	890.968	Gubaoquan	X11-100-1-16	0.0628866	0.00184447	0.282274
1597	granitic gneiss	891	Gubaoquan	21	0.0709	0.002243	0.2822
1598	augen two-mica granitic gneiss	891.343	Gubaoquan	X11-97-2-04	0.0380039	0.00121673	0.282177
1599	augen gneiss	891.38	Gubaoquan	X11-99-2-05	0.0427976	0.00127264	0.282215
1600	granitic gneiss	891.485	Gubaoquan	X10-27-2-07	0.0269593	0.000784339	0.282238
1601	augen two-mica granitic gneiss	891.486	Gubaoquan	X11-97-2-16	0.0457389	0.0013212	0.282181
1602	augen gneiss	891.651	Gubaoquan	X11-99-2-01	0.0827275	0.00258952	0.282253
1603	granitic gneiss	891.805	Gubaoquan	X10-27-2-31	0.0373006	0.00108044	0.282243
1604	augen gneiss	892.11	Gubaoquan	X11-99-2-03	0.0765836	0.00242299	0.282194
1605	augen gneiss	892.28	Gubaoquan	X11-99-2-35	0.0527881	0.0016506	0.282275
1606	granitic gneiss	892.487	Gubaoquan	X10-27-2-03	0.0301701	0.000826094	0.282306
1607	augen gneiss	892.562	Gubaoquan	X11-99-2-18	0.138361	0.00413938	0.282269
1608	two-mica plagioclase gneiss	892.643	Gubaoquan	X11-99-1-18	0.069258	0.00208936	0.282296
1609	two-mica plagioclase gneiss	892.842	Gubaoquan	X11-99-1_30	0.0665304	0.00210732	0.282289
1610	two-mica granitic gneiss	893.073	Gubaoquan	X11-100-1-35	0.0715712	0.00194012	0.282347
1611	augen gneiss	893.353	Gubaoquan	X11-99-2-24	0.046685	0.00134504	0.282223
1612	two-mica granitic gneiss	893.553	Gubaoquan	X11-100-1-24	0.0779002	0.00249296	0.282311
1613	two-mica granitic gneiss	893.639	Gubaoquan	X11-100-1-12	0.0796727	0.0021465	0.282299
1614	mylonitized granite	894	Baishantang	TW25-1	0.0463004	0.00143753	0.282179
1615	mylonitized granite	894	Baishantang	TW25-3	0.14066	0.00336492	0.282252
1616	mylonitized granite	894	Baishantang	TW25-4	0.143497	0.0035805	0.28221
1617	mylonitized granite	894	Baishantang	TW25-6	0.0644512	0.00176246	0.282213
1618	mylonitized granite	894	Baishantang	TW25-7	0.0486266	0.00141381	0.282181
1619	mylonitized granite	894	Baishantang	TW25-8	0.0691328	0.00195455	0.282197
1620	mylonitized granite	894	Baishantang	TW25-19	0.0401722	0.00111556	0.282212
1621	mylonitized granite	894	Baishantang	TW25-22	0.0626617	0.00163153	0.282175
1622	mylonitized granite	894	Baishantang	TW25-23	0.0566975	0.0016849	0.282168
1623	mylonitized granite	894	Baishantang	TW25-25	0.0738536	0.00192259	0.282277
1624	mylonitized granite	894	Baishantang	TW25-27	0.0640097	0.00171277	0.28225
1625	two-mica plagioclase gneiss	894.168	Gubaoquan	X11-99-1_26	0.0775717	0.00233764	0.282263
1626	augen gneiss	894.698	Gubaoquan	X11-101-1_24	0.0292161	0.000878082	0.282421
1627	augen gneiss	894.751	Gubaoquan	X11-101-1_29	0.161395	0.00415281	0.282485
1628	granitic gneiss	894.764	Gubaoquan	X10-27-2-05	0.0253553	0.000696022	0.282315
1629	two-mica plagioclase gneiss	894.852	Gubaoquan	X11-99-1_24	0.0414903	0.00116164	0.282172
1630	augen two-mica granitic gneiss	894.993	Gubaoquan	X11-97-2_25	0.0324546	0.000900609	0.282175
1631	granitic gneiss	895	Baishantang	TW26-1	0.0553537	0.00160929	0.282148
1632	granitic gneiss	895	Baishantang	TW26-3	0.0437341	0.00133818	0.282059
1633	granitic gneiss	895	Baishantang	TW26-4	0.0887198	0.00245643	0.282256
1634	granitic gneiss	895	Baishantang	TW26-5	0.0509323	0.00153124	0.282258
1635	granitic gneiss	895	Baishantang	TW26-7	0.0959029	0.00292153	0.282212
1636	granitic gneiss	895	Baishantang	TW26-9	0.0521176	0.00159454	0.282194
1637	granitic gneiss	895	Baishantang	TW26-12	0.0528604	0.00148168	0.282167
1638	granitic gneiss	895	Baishantang	TW26-16	0.0684158	0.00195328	0.282212
1639	granitic gneiss	895	Baishantang	TW26-17	0.0796955	0.00232883	0.282193
1640	granitic gneiss	895	Baishantang	TW26-18	0.0745173	0.00219675	0.282211
1641	granitic gneiss	895	Baishantang	TW26-19	0.0516998	0.00152124	0.282167
1642	granitic gneiss	895	Baishantang	TW26-20	0.0884014	0.00275914	0.282241
1643	augen two-mica granitic gneiss	895.09	Gubaoquan	X11-97-2-13	0.0227557	0.00065314	0.28218
1644	augen gneiss	895.267	Gubaoquan	X11-99-2-06	0.10892	0.0032071	0.282285
1645	granitic gneiss	895.276	Gubaoquan	X10-27-2-09	0.018503	0.000560195	0.282264
1646	two-mica plagioclase gneiss	895.365	Gubaoquan	X11-99-1-17	0.069662	0.00215836	0.282324
1647	augen two-mica granitic gneiss	895.403	Gubaoquan	X11-97-2-06	0.0870983	0.0026141	0.282297
1648	two-mica plagioclase gneiss	895.592	Gubaoquan	X11-99-1-14	0.0883206	0.0024675	0.282307
1649	augen gneiss	895.627	Gubaoquan	X11-101-1_35	0.0925963	0.00241794	0.282339
1650	two-mica plagioclase gneiss	895.628	Gubaoquan	X11-99-1-06	0.0530512	0.00167725	0.282231
1651	two-mica granitic gneiss	895.694	Gubaoquan	X11-100-1-18	0.0631065	0.00187011	0.282264
1652	granitic gneiss	895.737	Gubaoquan	X10-27-2-06	0.0281232	0.000768617	0.282312
1653	two-mica granitic gneiss	895.901	Gubaoquan	X11-100-1-34	0.0875629	0.00250179	0.282311
1654	granitic gneiss	895.96	Gubaoquan	X10-27-2-15	0.0283977	0.000787206	0.282279
1655	granitic gneiss	896	Gubaoquan	5	0.04937	0.001554	0.28221
1656	granitic gneiss	896	Gubaoquan	8	0.06254	0.001949	0.28224
1657	granitic gneiss	896	Gubaoquan	11	0.06923	0.002144	0.28224
1658	augen gneiss	896.081	Gubaoquan	X11-101-1-04	0.0976355	0.00263101	0.282349
1659	two-mica plagioclase gneiss	896.625	Gubaoquan	X11-99-1-05	0.0534903	0.00159282	0.2822
1660	augen gneiss	896.632	Gubaoquan	X11-99-2-13	0.153661	0.00468476	0.281895
1661	granitic gneiss	896.7	Gubaoquan	X10-27-2-18	0.0322478	0.0008633	0.282295
1662	augen gneiss	896.844	Gubaoquan	X11-101-1-09	0.15433	0.00391504	0.282421
1663	two-mica plagioclase gneiss	896.917	Gubaoquan	X11-99-1-02	0.0554674	0.00187641	0.282259
1664	augen gneiss	897.08	Gubaoquan	X11-99-2-09	0.0685595	0.00197283	0.282299
1665	granitic gneiss	897.332	Gubaoquan	X10-27-2-02	0.0297541	0.000818146	0.28227
1666	granitic gneiss	897.358	Gubaoquan	X10-27-2-23	0.0258427	0.000764075	0.282248
1667	two-mica granitic gneiss	897.716	Gubaoquan	X11-100-1-30	0.0401433	0.0011	0.282228
1668	two-mica plagioclase gneiss	897.869	Gubaoquan	X11-99-1-09	0.0574741	0.00164795	0.282236
1669	two-mica plagioclase gneiss	897.887	Gubaoquan	X11-99-1-12	0.0684269	0.00214918	0.282334
1670	granitic gneiss	898	Gubaoquan	19	0.04771	0.001534	0.28225
1671	augen gneiss	898.329	Gubaoquan	X11-99-2-21	0.052971	0.00133681	0.282278
1672	augen gneiss	898.781	Gubaoquan	X11-99-2-28	0.0439546	0.00127252	0.282256
1673	augen gneiss	898.863	Gubaoquan	X11-99-2-14	0.0713	0.00193696	0.282288
1674	granitic gneiss	898.897	Gubaoquan	X10-27-2-36	0.0192856	0.00054359	0.282244
1675	granitic gneiss	898.907	Gubaoquan	X10-27-2-14	0.0272459	0.000753054	0.282275
1676	augen gneiss	898.943	Gubaoquan	X11-99-2-19	0.0696839	0.00222176	0.282073
1677	granitic gneiss	899.276	Gubaoquan	X10-27-2-28	0.0320709	0.000959906	0.282217
1678	granitic gneiss	899.403	Gubaoquan	X10-27-2-17	0.0301149	0.000846503	0.282308
1679	augen gneiss	899.437	Gubaoquan	X11-99-2-29	0.135933	0.0039692	0.282248
1680	augen two-mica granitic gneiss	899.872	Gubaoquan	X11-97-2-15	0.048659	0.00139798	0.282164
1681	augen gneiss	899.908	Gubaoquan	X11-99-2-36	0.0551405	0.001817	0.282274
1682	augen gneiss	900.086	Gubaoquan	X11-99-2-12	0.060079	0.00174251	0.28227
1683	two-mica granitic gneiss	900.233	Gubaoquan	X11-100-1-01	0.0532306	0.00137309	0.282241
1684	granitic gneiss	900.424	Gubaoquan	X10-27-2-12	0.0277569	0.00077526	0.282263
1685	granitic gneiss	900.764	Gubaoquan	X10-27-2-11	0.0284083	0.000825289	0.282245
1686	granitic gneiss	901	Gubaoquan	10	0.04805	0.001509	0.28222
1687	augen gneiss	901.032	Gubaoquan	X11-99-2-26	0.0517815	0.00150761	0.282219
1688	augen two-mica granitic gneiss	901.505	Gubaoquan	X11-97-2-01	0.0689151	0.00227032	0.282258
1689	two-mica granitic gneiss	901.52	Gubaoquan	X11-100-1-13	0.055456	0.00178349	0.281784
1690	augen two-mica granitic gneiss	901.585	Gubaoquan	X11-97-2-11	0.0444216	0.00124917	0.282159
1691	augen two-mica granitic gneiss	901.671	Gubaoquan	X11-97-2-10	0.0723036	0.00217568	0.282316
1692	augen gneiss	901.757	Gubaoquan	X11-99-2-34	0.0365641	0.00110322	0.282157
1693	granitic gneiss	902	Gubaoquan	9	0.08141	0.002584	0.28224
1694	augen two-mica granitic gneiss	902.819	Gubaoquan	X11-97-2-09	0.0449075	0.00133463	0.282213
1695	two-mica plagioclase gneiss	902.826	Gubaoquan	X11-99-1-03	0.0531611	0.00162213	0.282219
1696	two-mica plagioclase gneiss	903.268	Gubaoquan	X11-99-1-16	0.0402259	0.00117022	0.282247
1697	two-mica plagioclase gneiss	903.399	Gubaoquan	X11-99-1-10	0.0745879	0.00205091	0.282303
1698	granitic gneiss	903.563	Gubaoquan	X10-27-2-04	0.0174978	0.000498536	0.2825
1699	two-mica plagioclase gneiss	903.673	Gubaoquan	X11-99-1_27	0.0677122	0.00213917	0.282291
1700	augen gneiss	903.911	Gubaoquan	X11-101-1-11	0.0236826	0.000740409	0.282444
1701	granitic gneiss	904	Gubaoquan	12	0.05983	0.001877	0.28226
1702	granitic gneiss	904	Gubaoquan	16	0.04995	0.001571	0.28221
1703	granitic gneiss	904.139	Gubaoquan	X10-27-2-30	0.0300068	0.000883018	0.282222
1704	granitic gneiss	904.586	Gubaoquan	X10-27-2-24	0.0617408	0.00170962	0.282362
1705	two-mica granitic gneiss	904.586	Gubaoquan	X11-100-1-29	0.125987	0.00334242	0.282357
1706	granitic gneiss	904.592	Gubaoquan	X10-27-2-16	0.0217789	0.000594477	0.282291
1707	granitic gneiss	905	Gubaoquan	23	0.03553	0.001099	0.28221
1708	two-mica granitic gneiss	905.089	Gubaoquan	X11-100-1-02	0.0764003	0.00206858	0.282269
1709	granitic gneiss	905.328	Gubaoquan	X10-27-2-29	0.100469	0.00279671	0.282311
1710	two-mica plagioclase gneiss	905.804	Gubaoquan	X11-99-1-04	0.0544826	0.00191648	0.282299
1711	granitic gneiss	906	Gubaoquan	3	0.0639	0.002031	0.28227
1712	augen gneiss	906.062	Gubaoquan	X11-99-2-07	0.0534332	0.00157233	0.282255
1713	granitic gneiss	906.071	Gubaoquan	X10-27-2-21	0.0350643	0.00101611	0.282275
1714	two-mica plagioclase gneiss	906.099	Gubaoquan	X11-99-1_29	0.0573746	0.00179014	0.282301
1715	augen two-mica granitic gneiss	906.506	Gubaoquan	X11-97-2-12	0.0649773	0.00182185	0.282193
1716	granitic gneiss	907	Gubaoquan	14	0.05437	0.001727	0.28223
1717	granitic gneiss	907	Gubaoquan	22	0.09754	0.003032	0.28226
1718	granitic gneiss	908	Gubaoquan	1	0.05524	0.001751	0.28222
1719	gneiss	908	Baidunzi	X10-37-1-39	0.077761	0.001562	0.282205
1720	granitic gneiss	909	Gubaoquan	15	0.05527	0.001752	0.28225
1721	granitic gneiss	909	Gubaoquan	17	0.05541	0.001744	0.28223
1722	augen gneiss	910.413	Gubaoquan	X11-99-2-22	0.0922296	0.00285133	0.281902
1723	migmatization gneiss	918.233	Yadan	X10-7-4 09	0.0476016	0.00170263	0.282225
1724	migmatization gneiss	919.039	Yadan	X10-7-4 12	0.0494321	0.00181502	0.282203
1725	migmatization gneiss	920.91	Yadan	X10-7-4 10	0.0502009	0.0018357	0.282123
1726	migmatization gneiss	921.074	Yadan	X10-7-4 17	0.0489988	0.00180716	0.282206
1727	migmatization gneiss	925.69	Yadan	X10-7-4 16	0.021646	0.000788183	0.282404
1728	migmatization gneiss	930.64	Yadan	X10-7-4 07	0.0580841	0.00215147	0.282153
1729	migmatization gneiss	932.739	Yadan	X10-7-4 22	0.034119	0.00128975	0.28228
1730	migmatization gneiss	937.702	Yadan	X10-7-4 13	0.015111	0.000533102	0.282174
1731	migmatization gneiss	938.24	Yadan	X10-7-4 03	0.048381	0.00178478	0.282172
1732	migmatization gneiss	938.678	Yadan	X10-7-4 04	0.0478123	0.00179214	0.282197
1733	migmatization gneiss	938.795	Yadan	X10-7-4 15	0.0254725	0.000931989	0.282343
1734	migmatization gneiss	940.075	Yadan	X10-7-4 01	0.0554321	0.00202239	0.282281
1735	migmatization gneiss	943.263	Yadan	X10-7-4 24	0.055217	0.00197221	0.28219
1736	migmatization gneiss	951.806	Yadan	X10-7-4 11	0.0403874	0.0015047	0.282239
1737	mylonitic granite	985	Qiaowan	X10-98-2-14	0.02418	0.000897	0.282165
1738	augen gneiss	990.331	Gubaoquan	X11-99-2-08	0.117245	0.00355693	0.282051
1739	augen gneiss	992.665	Gubaoquan	X11-101-1_23	0.0207958	0.000650716	0.282437
1740	granitic gneiss	993.251	Gubaoquan	X10-27-2-25	0.0351543	0.000995748	0.282004
1741	augen gneiss	993.691	Gubaoquan	X11-101-1-08	0.134368	0.00344864	0.282403
1742	granitic gneiss	994.06	Gubaoquan	X10-27-2-32	0.0344319	0.000987081	0.282216
1743	augen gneiss	994.593	Gubaoquan	X11-101-1-17	0.0392991	0.00119104	0.282069
1744	two-mica granitic gneiss	995.168	Gubaoquan	X11-100-1-15	0.017215	0.000531195	0.282439
1745	two-mica granitic gneiss	1087.04	Gubaoquan	X11-100-1-09	0.147241	0.00436081	0.282232
1746	augen two-mica granitic gneiss	1253.7	Gubaoquan	X11-97-2_28	0.1616	0.0047771	0.282343
1747	granitic gneiss	1268	Hongshishan	10HSS01-2	0.040994	0.001384	0.282168
1748	augen two-mica granitic gneiss	1320.37	Gubaoquan	X11-97-2-17	0.102151	0.00283053	0.282312
1749	augen two-mica granitic gneiss	1373.77	Gubaoquan	X11-97-2_33	0.0346747	0.00103502	0.28189
1750	two-mica plagioclase gneiss	1375.93	Gubaoquan	X11-99-1_36	0.0244877	0.000712492	0.281871
1751	granitic gneiss	1395.33	Shibandun	16BS036-19	0.0449186	0.00178236	0.282103
1752	granitic gneiss	1396.34	Shibandun	16BS036-06	0.0703232	0.00235732	0.282252
1753	granitic gneiss	1400	Shibandun	16BS036-16	0.0552736	0.00211433	0.282102
1754	granitic gneiss	1400	Shibandun	16BS036-11	0.0624973	0.00187842	0.282251
1755	granitic gneiss	1401	Jiujing	16BS077-29	0.0623212	0.00207125	0.282031
1756	granitic gneiss	1401	Jiujing	16BS077-27	0.0638656	0.00216339	0.282072
1757	granitic gneiss	1401	Jiujing	16BS077-26	0.0842989	0.00245432	0.282098
1758	granitic gneiss	1401	Jiujing	16BS077-25	0.055566	0.00178237	0.282039
1759	granitic gneiss	1401	Jiujing	16BS077-21	0.0688618	0.00272157	0.282215
1760	granitic gneiss	1401	Jiujing	16BS077-20	0.0573208	0.0020945	0.282092
1761	granitic gneiss	1401	Jiujing	16BS077-19	0.0615472	0.00218664	0.282071
1762	granitic gneiss	1401	Jiujing	16BS077-17	0.0836261	0.00268376	0.282135
1763	granitic gneiss	1401	Jiujing	16BS077-15	0.0552588	0.00165346	0.282071
1764	granitic gneiss	1401	Jiujing	16BS077-13	0.0922137	0.00263047	0.282105
1765	granitic gneiss	1401	Jiujing	16BS077-11	0.0708515	0.00248218	0.282121
1766	granitic gneiss	1401	Jiujing	16BS077-10	0.0617313	0.00183059	0.282101
1767	granitic gneiss	1401	Jiujing	16BS077-07	0.0570851	0.00201526	0.282093
1768	granitic gneiss	1401	Jiujing	16BS077-06	0.0529901	0.00164667	0.282064
1769	granitic gneiss	1401	Jiujing	16BS077-02	0.0913009	0.00321169	0.28205
1770	granitic gneiss	1401	Jiujing	16BS077-01	0.0870034	0.00293616	0.282069
1771	granitic gneiss	1402.7	Shibandun	16BS036-10	0.0525967	0.00220853	0.282298
1772	granodiorite	1403	Jiujing	16BS072-23	0.0339851	0.00120224	0.282037
1773	granodiorite	1403	Jiujing	16BS072-22	0.102018	0.00365381	0.282068
1774	granodiorite	1403	Jiujing	16BS072-21	0.067618	0.00220002	0.282071
1775	granodiorite	1403	Jiujing	16BS072-20	0.0343941	0.00120569	0.282073
1776	granodiorite	1403	Jiujing	16BS072-19	0.0377183	0.00117158	0.282088
1777	granodiorite	1403	Jiujing	16BS072-17	0.0731897	0.00253096	0.282084
1778	granodiorite	1403	Jiujing	16BS072-16	0.0655696	0.00221576	0.282058
1779	granodiorite	1403	Jiujing	16BS072-14	0.0541029	0.00168483	0.282026
1780	granodiorite	1403	Jiujing	16BS072-11	0.0495475	0.00153945	0.282043
1781	granodiorite	1403	Jiujing	16BS072-10	0.0600143	0.0020844	0.282027
1782	granodiorite	1403	Jiujing	16BS072-08	0.0696462	0.00206371	0.282056
1783	granodiorite	1403	Jiujing	16BS072-07	0.0747529	0.00233934	0.282109
1784	granodiorite	1403	Jiujing	16BS072-06	0.0428963	0.0014905	0.282097
1785	granodiorite	1403	Jiujing	16BS072-04	0.0597486	0.00204689	0.282041
1786	granodiorite	1403	Jiujing	16BS072-02	0.0451507	0.00157984	0.282039
1787	granodiorite	1403	Jiujing	16BS072-01	0.0731944	0.00254562	0.282086
1788	granodiorite	1404	Jiujing	16BS069-24	0.0487598	0.00154282	0.282
1789	granodiorite	1404	Jiujing	16BS069-23	0.0343709	0.00124447	0.282014
1790	granodiorite	1404	Jiujing	16BS069-22	0.0255236	0.000947532	0.282038
1791	granodiorite	1404	Jiujing	16BS069-21	0.025296	0.000953883	0.282034
1792	granodiorite	1404	Jiujing	16BS069-20	0.0323368	0.00116959	0.28202
1793	granodiorite	1404	Jiujing	16BS069-18	0.0688904	0.00227478	0.28201
1794	granodiorite	1404	Jiujing	16BS069-17	0.0379269	0.00129176	0.282019
1795	granodiorite	1404	Jiujing	16BS069-14	0.0393402	0.00138744	0.282035
1796	granodiorite	1404	Jiujing	16BS069-13	0.0294752	0.00102348	0.282035
1797	granodiorite	1404	Jiujing	16BS069-11	0.0290813	0.000913496	0.282031
1798	granodiorite	1404	Jiujing	16BS069-10	0.0376464	0.00116411	0.282047
1799	granodiorite	1404	Jiujing	16BS069-07	0.0428996	0.00142388	0.282012
1800	granodiorite	1404	Jiujing	16BS069-05	0.0222023	0.000788699	0.282033
1801	granodiorite	1404	Jiujing	16BS069-04	0.0335792	0.00123292	0.28203
1802	granodiorite	1404	Jiujing	16BS069-02	0.0352395	0.00119515	0.282021
1803	granodiorite	1404	Jiujing	16BS069-01	0.0251071	0.000833733	0.28202
1804	granitic gneiss	1404.56	Shibandun	16BS036-23	0.0546411	0.00201617	0.282243
1805	granitic gneiss	1406.39	Shibandun	16BS036-01	0.0704263	0.00165344	0.282138
1806	granite	1406.7	Qiaowan	16BS092-06	0.0701362	0.00195848	0.282068
1807	granodiorite	1407	Jiujing	16BS070-1-24	0.0491499	0.00175853	0.282077
1808	granodiorite	1407	Jiujing	16BS070-1-23	0.0646304	0.00212295	0.282101
1809	granodiorite	1407	Jiujing	16BS070-1-22	0.0614546	0.00190792	0.282136
1810	granodiorite	1407	Jiujing	16BS070-1-21	0.0620914	0.0021274	0.282084
1811	granodiorite	1407	Jiujing	16BS070-1-20	0.0438492	0.00145792	0.282075
1812	granodiorite	1407	Jiujing	16BS070-1-19	0.0335873	0.00126421	0.282141
1813	granodiorite	1407	Jiujing	16BS070-1-14	0.0437105	0.00157821	0.282078
1814	granodiorite	1407	Jiujing	16BS070-1-13	0.0361948	0.00128894	0.282071
1815	granodiorite	1407	Jiujing	16BS070-1-11	0.0626458	0.00227387	0.282096
1816	granodiorite	1407	Jiujing	16BS070-1-08	0.0377869	0.00113988	0.282061
1817	granodiorite	1407	Jiujing	16BS070-1-07	0.060648	0.00203493	0.282105
1818	granodiorite	1407	Jiujing	16BS070-1-06	0.0583153	0.00170829	0.282096
1819	granodiorite	1407	Jiujing	16BS070-1-03	0.0954387	0.00274073	0.282146
1820	granodiorite	1407	Jiujing	16BS070-1-02	0.078272	0.00263049	0.282112
1821	granodiorite	1407	Jiujing	16BS070-1-01	0.085782	0.00246826	0.282091
1822	granite	1408.07	Qiaowan	16BS092-12	0.0701457	0.00197673	0.282247
1823	gneiss	1418	Jiujing	16BS070-2-24	0.079662	0.00203819	0.2821
1824	gneiss	1418	Jiujing	16BS070-2-21	0.0432191	0.00112714	0.282078
1825	gneiss	1418	Jiujing	16BS070-2-20	0.0489037	0.00130929	0.282064
1826	gneiss	1418	Jiujing	16BS070-2-19	0.0728416	0.00174332	0.28209
1827	gneiss	1418	Jiujing	16BS070-2-17	0.0509601	0.00129095	0.282072
1828	gneiss	1418	Jiujing	16BS070-2-16	0.0481644	0.00115809	0.282129
1829	gneiss	1418	Jiujing	16BS070-2-13	0.0612783	0.00143409	0.282138
1830	gneiss	1418	Jiujing	16BS070-2-12	0.0463169	0.00112625	0.282077
1831	gneiss	1418	Jiujing	16BS070-2-11	0.055988	0.00154561	0.282101
1832	gneiss	1418	Jiujing	16BS070-2-10	0.0671398	0.001828	0.282091
1833	gneiss	1418	Jiujing	16BS070-2-08	0.0454895	0.0012702	0.282072
1834	gneiss	1418	Jiujing	16BS070-2-06	0.0406979	0.00111825	0.2821
1835	gneiss	1418	Jiujing	16BS070-2-04	0.0506806	0.00131503	0.282196
1836	gneiss	1418	Jiujing	16BS070-2-03	0.0343514	0.000888415	0.282055
1837	gneiss	1418	Jiujing	16BS070-2-02	0.0494998	0.00141193	0.282091
1838	gneiss	1418	Jiujing	16BS070-2-01	0.0663646	0.00191226	0.282108
1839	granite	1431.96	Qiaowan	16BS092-02	0.0922174	0.00197901	0.282174
1840	granite	1434.68	Qiaowan	16BS092-09	0.0660759	0.0014523	0.282106
1841	augen two-mica granitic gneiss	1438.89	Gubaoquan	X11-97-2_31	0.0801163	0.00252519	0.282289
1842	two-mica plagioclase gneiss	1442.6	Gubaoquan	X11-99-1_20	0.0501814	0.00157955	0.28229
1843	augen gneiss	1442.6	Gubaoquan	X11-99-2-02	0.0440835	0.00118487	0.281909
1844	gar-bearing granite	1450	Jiujing	16BS075-24	0.08361	0.00242936	0.28213
1845	gar-bearing granite	1450	Jiujing	16BS075-22	0.0617826	0.00182427	0.282067
1846	gar-bearing granite	1450	Jiujing	16BS075-19	0.0388863	0.00150228	0.282218
1847	gar-bearing granite	1450	Jiujing	16BS075-18	0.0631705	0.0018066	0.28209
1848	gar-bearing granite	1450	Jiujing	16BS075-13	0.0726874	0.00212733	0.282079
1849	gar-bearing granite	1450	Jiujing	16BS075-12	0.0653604	0.00195047	0.282077
1850	gar-bearing granite	1450	Jiujing	16BS075-11	0.0640973	0.00184713	0.282096
1851	gar-bearing granite	1450	Jiujing	16BS075-10	0.0707457	0.00209769	0.282119
1852	gar-bearing granite	1450	Jiujing	16BS075-09	0.160161	0.00417259	0.282118
1853	gar-bearing granite	1450	Jiujing	16BS075-07	0.0408403	0.00126313	0.28217
1854	gar-bearing granite	1450	Jiujing	16BS075-05	0.0498928	0.00149348	0.282086
1855	gar-bearing granite	1450	Jiujing	16BS075-03	0.0560801	0.00196524	0.282094
1856	gar-bearing granite	1450	Jiujing	16BS075-02	0.0689996	0.00244793	0.282085
1857	gar-bearing granite	1450	Jiujing	16BS075-01	0.125119	0.00406738	0.282192
1858	two-mica plagioclase gneiss	1472.22	Gubaoquan	X11-99-1_25	0.0850303	0.00265887	0.282314
1859	two-mica granitic gneiss	1479.63	Gubaoquan	X11-100-1-06	0.0592227	0.00180345	0.281998
1860	granitic gneiss	1489	Gubaoquan	X10-27-2-01	0.034104	0.00100918	0.281792
1861	augen two-mica granitic gneiss	1494.75	Gubaoquan	X11-97-2_34	0.0483683	0.00148179	0.28197
1862	two-mica granitic gneiss	1498.15	Gubaoquan	X11-100-1-23	0.0528209	0.0015641	0.28194
1863	augen two-mica granitic gneiss	1505.87	Gubaoquan	X11-97-2-18	0.0352951	0.000951397	0.28183
1864	augen two-mica granitic gneiss	1519.66	Gubaoquan	X11-97-2-08	0.0380441	0.00121737	0.282086
1865	biotite–plagioclase gneiss	1527	Mazongshan	10MZS04-11	0.035107	0.001297	0.282307
1866	augen two-mica granitic gneiss	1532.41	Gubaoquan	X11-97-2_32	0.0488094	0.00138393	0.281903
1867	augen two-mica granitic gneiss	1706.48	Gubaoquan	X11-97-2_30	0.0299202	0.000944882	0.282085
1868	gneiss	1756	Baidunzi	X10-37-1-41	0.077111	0.00147	0.281815
1869	augen gneiss	1781.17	Gubaoquan	X11-99-2-30	0.0323519	0.000936841	0.281875
1870	augen two-mica granitic gneiss	1811.11	Gubaoquan	X11-97-2_27	0.0313074	0.000992811	0.281701
1871	augen two-mica granitic gneiss	1847.22	Gubaoquan	X11-97-2_20	0.0261973	0.000907363	0.281845
1872	rhyolite	264	40. 55 °	14YJZ-Tw2-8	0.019395	0.000716	0.282706
1873	rhyolite	268	40. 55 °	14YJZ-Tw2-3	0.029514	0.001037	0.282721
1874	rhyolite	270	40. 55 °	14YJZ-Tw2-6	0.024658	0.000765	0.2827
1875	rhyolite	270	40. 55 °	14YJZ-Tw2-7	0.020677	0.000642	0.282687
1876	rhyolite	273	Yinaoxia	1	0.047357	0.001247	0.282675
1877	rhyolite	273	Yinaoxia	2	0.046499	0.00112	0.282484
1878	rhyolite	273	Yinaoxia	3	0.051301	0.001222	0.282636
1879	rhyolite	273	Yinaoxia	4	0.04011	0.000992	0.282525
1880	rhyolite	273	Yinaoxia	8	0.065815	0.001748	0.282697
1881	rhyolite	273	Yinaoxia	9	0.04945	0.001216	0.28261
1882	rhyolite	273	Yinaoxia	10	0.060333	0.001401	0.282651
1883	rhyolite	273	Yinaoxia	11	0.081851	0.002055	0.282722
1884	rhyolite	273	Yinaoxia	12	0.061228	0.001517	0.2827
1885	rhyolite	273	Yinaoxia	14	0.091039	0.002257	0.282723
1886	rhyolite	273	Yinaoxia	15	0.06841	0.001565	0.282657
1887	rhyolite	273	Yinaoxia	19	0.060558	0.001521	0.28266
1888	rhyolite	273	Yinaoxia	21	0.046523	0.001189	0.282669
1889	rhyolite	273	Yinaoxia	23	0.061033	0.001426	0.282549
1890	rhyolite	273	Yinaoxia	24	0.047166	0.00117	0.28244
1891	rhyolite	274	40. 55 °	14YJZ-Tw2-5	0.013997	0.00051	0.282657
1892	rhyolite	274	40. 54 °	16DS-Tw5-3	0.036011	0.001224	0.283013
1893	rhyolite	275	40. 55 °	14YJZ-Tw2-4	0.019238	0.000693	0.282676
1894	rhyolite	276	40. 54 °	16DS-Tw5-8	0.039741	0.001347	0.283028
1895	rhyolite	277	40. 55 °	14YJZ-Tw2-1	0.039635	0.001365	0.282758
1896	rhyolite	277	40. 55 °	14YJZ-Tw2-2	0.036396	0.001247	0.282742
1897	rhyolite	278	40. 54 °	16DS-Tw5-2	0.051798	0.00168	0.28308
1898	rhyolite	278	40. 54 °	16DS-Tw5-5	0.029444	0.001054	0.282926
1899	rhyolite	279	40. 54 °	16DS-Tw5-1	0.031249	0.001046	0.282957
1900	rhyolite	279.1	Bijiashan	HSS6-1		0.001463	0.282684
1901	rhyolite	279.1	Bijiashan	HSS6-2		0.000816	0.282676
1902	rhyolite	279.1	Bijiashan	HSS6-3		0.000924	0.282818
1903	rhyolite	279.1	Bijiashan	HSS6-4		0.003889	0.282844
1904	rhyolite	279.1	Bijiashan	HSS6-5		0.002201	0.282961
1905	rhyolite	279.1	Bijiashan	HSS6-6		0.000558	0.282609
1906	rhyolite	279.1	Bijiashan	HSS6-7		0.002221	0.282839
1907	rhyolite	279.1	Bijiashan	HSS6-8		0.001145	0.282659
1908	rhyolite	279.1	Bijiashan	HSS6-9		0.001226	0.282945
1909	rhyolite	279.1	Bijiashan	HSS6-10		0.006239	0.282871
1910	rhyolite	279.1	Bijiashan	HSS6-11		0.001223	0.282729
1911	rhyolite	279.1	Bijiashan	HSS6-12		0.001342	0.283075
1912	rhyolite	279.1	Bijiashan	HSS6-13		0.002372	0.282753
1913	rhyolite	282	40. 55 °	14YJZ-Tw2-11	0.022074	0.000659	0.282653
1914	rhyolite	283	40. 54 °	16DS-Tw5-6	0.043656	0.001445	0.283002
1915	rhyolite	284	40. 54 °	16DS-Tw5-4	0.028672	0.000975	0.282962
1916	rhyolite	284	40. 54 °	16DS-Tw5-7	0.028461	0.000981	0.282959
1917	rhyolite	285	41. 05°	14SHJ-Tw2-11	0.034415	0.001163	0.282639
1918	rhyolite	286	40. 55 °	14YJZ-Tw2-9	0.017977	0.000566	0.282639
1919	rhyolite	287	40. 81 °	14SHSS-Tw1-9	0.030946	0.001101	0.282797
1920	rhyolite	287	40. 73 °	13GQ-Twl-4	0.017501	0.000477	0.282674
1921	rhyolite	287	40. 73 °	13GQ-Twl-6	0.038311	0.000985	0.282822
1922	rhyolite	288	40. 81 °	14SHSS-Tw1-4	0.055013	0.001888	0.282906
1923	rhyolite	288	41. 05°	14SHJ-Tw2-5	0.044369	0.001572	0.282725
1924	rhyolite	288	40. 54 °	16DS-Tw5-9	0.029144	0.00099	0.283032
1925	rhyolite	289	41. 05°	14SHJ-Tw2-3	0.02563	0.000859	0.282694
1926	rhyolite	290	40. 73 °	13GQ-Twl-9	0.097933	0.002381	0.282809
1927	rhyolite	291	40. 81 °	14SHSS-Tw1-13	0.033472	0.001254	0.282795
1928	rhyolite	291	40. 73 °	13GQ-Twl-7	0.067086	0.001706	0.282707
1929	rhyolite	292	40. 73 °	13GQ-Twl-1	0.06061	0.001574	0.282758
1930	rhyolite	293	40. 81 °	14SHSS-Tw1-8	0.023885	0.000767	0.282732
1931	rhyolite	293	41. 05°	14SHJ-Tw2-6	0.058266	0.001869	0.282816
1932	rhyolite	293	41. 05°	14SHJ-Tw2-9	0.029564	0.000998	0.282713
1933	rhyolite	293	41. 05°	14SHJ-Tw2-12	0.052643	0.001611	0.282872
1934	rhyolite	294	40. 81 °	14SHSS-Tw1-14	0.045456	0.001284	0.282833
1935	rhyolite	294	40. 73 °	13GQ-Twl-8	0.083368	0.002073	0.282671
1936	rhyolite	295	40. 81 °	14SHSS-Tw1-3	0.0268	0.000792	0.282775
1937	rhyolite	295	41. 05°	14SHJ-Tw2-8	0.029372	0.000877	0.282631
1938	rhyolite	296	40. 81 °	14SHSS-Tw1-2	0.033164	0.001037	0.282844
1939	rhyolite	296	40. 81 °	14SHSS-Tw1-6	0.031857	0.000968	0.282733
1940	rhyolite	296	40. 81 °	14SHSS-Tw1-7	0.029166	0.000902	0.282787
1941	rhyolite	296	41. 05°	14SHJ-Tw2-1	0.029586	0.000995	0.282765
1942	rhyolite	296	41. 05°	14SHJ-Tw2-2	0.064691	0.00199	0.282784
1943	rhyolite	296	40. 73 °	13GQ-Twl-10	0.095959	0.002275	0.28273
1944	rhyolite	298	40. 73 °	13GQ-Twl-11	0.058705	0.001364	0.282764
1945	rhyolite	298	40. 73 °	13GQ-Twl-12	0.059641	0.001379	0.282756
1946	rhyolite	300	40. 81 °	14SHSS-Tw1-12	0.022686	0.000733	0.282794
1947	rhyolite	301	40. 81 °	14SHSS-Tw1-1	0.054544	0.001908	0.282865
1948	rhyolite	301	40. 81 °	14SHSS-Tw1-10	0.029325	0.000885	0.282737
1949	rhyolite	301	40. 73 °	13GQ-Twl-5	0.027241	0.000747	0.282711
1950	dacite	328	Shuangjingzi	X10-45-1-02	0.0845352	0.00323798	0.282915
1951	dacite	328	Shuangjingzi	X10-45-1-03	0.0874907	0.00325463	0.282849
1952	dacite	328	Shuangjingzi	X10-45-1-04	0.0758342	0.002883	0.282892
1953	dacite	328	Shuangjingzi	X10-45-1-05	0.0683523	0.00255565	0.282889
1954	dacite	328	Shuangjingzi	X10-45-1-06	0.0646923	0.0023594	0.282938
1955	dacite	328	Shuangjingzi	X10-45-1-08	0.0748915	0.0027546	0.282945
1956	dacite	328	Shuangjingzi	X10-45-1-09	0.0753036	0.00290059	0.282907
1957	dacite	328	Shuangjingzi	X10-45-1-10	0.0502742	0.00188102	0.282746
1958	dacite	328	Shuangjingzi	X10-45-1-12	0.0727531	0.00273449	0.282833
1959	dacite	328	Shuangjingzi	X10-45-1-13	0.065856	0.00244436	0.282876
1960	dacite	328	Shuangjingzi	X10-45-1-14	0.0675053	0.00256329	0.282827
1961	dacite	328	Shuangjingzi	X10-45-1-15	0.0356713	0.00136073	0.282747
1962	dacite	328	Shuangjingzi	X10-45-1-17	0.0877964	0.00329825	0.282839
1963	dacite	328	Shuangjingzi	X10-45-1-18	0.140474	0.00509135	0.282901
1964	spilite	355	Shuangjingzi	JDTW02-17	0.089345	0.001636	0.282766
1965	spilite	356	Shuangjingzi	JDTW02-22	0.042602	0.000871	0.28284
1966	spilite	359	Shuangjingzi	JDTW02-13	0.06313	0.001208	0.282736
1967	spilite	360	Shuangjingzi	JDTW02-18	0.07912	0.001629	0.28284
1968	spilite	360	Shuangjingzi	JDTW02-21	0.056363	0.000972	0.282778
1969	spilite	360	Shuangjingzi	JDTW02-27	0.084355	0.001644	0.282833
1970	spilite	361	Shuangjingzi	JDTW02-01	0.043593	0.000909	0.282766
1971	spilite	361	Shuangjingzi	JDTW02-26	0.078191	0.001511	0.282744
1972	spilite	362	Shuangjingzi	JDTW02-03	0.044826	0.000879	0.28285
1973	spilite	363	Shuangjingzi	JDTW02-23	0.06004	0.001151	0.282725
1974	spilite	364	Shuangjingzi	JDTW02-24	0.070908	0.001198	0.282879
1975	andesite	415.3	Xiaohuangshan	BA11-62-1	0.055509	0.001234	0.282886
1976	andesite	415.3	Xiaohuangshan	BA11-62-2	0.08583	0.001894	0.282884
1977	andesite	415.3	Xiaohuangshan	BA11-62-3	0.034288	0.00077	0.282853
1978	andesite	415.3	Xiaohuangshan	BA11-62-4	0.060754	0.001289	0.28285
1979	andesite	415.3	Xiaohuangshan	BA11-62-5	0.053486	0.001129	0.282861
1980	andesite	415.3	Xiaohuangshan	BA11-62-6	0.036571	0.000783	0.282879
1981	andesite	415.3	Xiaohuangshan	BA11-62-7	0.075019	0.001581	0.282777
1982	andesite	415.3	Xiaohuangshan	BA11-62-8	0.040164	0.00083	0.282884
1983	andesite	415.3	Xiaohuangshan	BA11-62-9	0.046374	0.000991	0.282829
1984	andesite	415.3	Xiaohuangshan	BA11-62-10	0.038126	0.000794	0.282837
1985	andesite	415.3	Xiaohuangshan	BA11-62-11	0.08077	0.001634	0.282858
1986	andesite	415.3	Xiaohuangshan	BA11-62-12	0.080306	0.001617	0.282907
1987	andesite	415.3	Xiaohuangshan	BA11-62-13	0.077121	0.001603	0.282876
1988	andesite	415.3	Xiaohuangshan	BA11-62-14	0.040197	0.000869	0.282919
1989	rhyolite	420	40. 73 °	13GQ-Twl-2	0.057339	0.001344	0.282773
1990	andesite	420.5	Xiaohuangshan	BA11-60-2	0.050196	0.001667	0.282748
1991	andesite	420.5	Xiaohuangshan	BA11-60-3	0.106726	0.003714	0.282846
1992	andesite	420.5	Xiaohuangshan	BA11-60-4	0.071748	0.002551	0.282917
1993	andesite	420.5	Xiaohuangshan	BA11-60-5	0.106081	0.00349	0.282892
1994	andesite	420.5	Xiaohuangshan	BA11-60-7	0.104532	0.003909	0.282876
1995	andesite	420.5	Xiaohuangshan	BA11-60-8	0.033209	0.001188	0.282851
1996	andesite	420.5	Xiaohuangshan	BA11-60-11	0.103133	0.003569	0.282901
1997	andesite	420.5	Xiaohuangshan	BA11-60-12	0.094765	0.003169	0.282899
1998	andesite	420.5	Xiaohuangshan	BA11-60-14	0.074136	0.002449	0.282846
[truncated: 2,086 more rows]
